# Supplementary material
Source: PubMed Central journal article supplement (PMC6583104)
Supplement: jama-320-450-s001.pdf [file jama-320-450-s001.pdf]

1 This Clinical Trial Protocol contains the following items:

2

3 1. Original protocol, revised protocol, and a summary of all amendments.

4

5 2. Original statistical analysis plan, final statistical analysis, and summary of all  
6 amendments.

7

## 9 **Table of Contents**

|    |                                                                 |    |
|----|-----------------------------------------------------------------|----|
| 10 | Original Protocol .....                                         | 5  |
| 11 | Specific Aims .....                                             | 5  |
| 12 | Background .....                                                | 6  |
| 13 | Recruitment.....                                                | 9  |
| 14 | Informed Consent .....                                          | 11 |
| 15 | Inclusion Criteria .....                                        | 11 |
| 16 | Exclusion Criteria: .....                                       | 12 |
| 17 | Study Procedural Overview .....                                 | 12 |
| 18 | Outcome Measures & Procedures .....                             | 16 |
| 19 | Description of Measures .....                                   | 21 |
| 20 | Anthropometric Measurements .....                               | 21 |
| 21 | Triceps Skinfolds .....                                         | 21 |
| 22 | Accelerometers .....                                            | 22 |
| 23 | Energy Intake .....                                             | 22 |
| 24 | Study Questionnaire .....                                       | 23 |
| 25 | Social Networks.....                                            | 23 |
| 26 | Genetics .....                                                  | 23 |
| 27 | Barriers to Physical Activity Questionnaire.....                | 23 |
| 28 | Control Measures .....                                          | 23 |
| 29 | Incentives.....                                                 | 24 |
| 30 | Data Collection Incentives.....                                 | 24 |
| 31 | Intervention Incentives .....                                   | 24 |
| 32 | Control Incentives.....                                         | 25 |
| 33 | Health-related Incentives.....                                  | 25 |
| 34 | Randomization .....                                             | 26 |
| 35 | Risk/Benefit Analysis .....                                     | 26 |
| 36 | Data and Safety Monitoring Plan .....                           | 28 |
| 37 | Policy for Blinding in COPTR .....                              | 29 |
| 38 | Study Design, Statistical Consideration and Analysis Plan ..... | 36 |
| 39 | Study Design .....                                              | 36 |
| 40 | Primary Research Question and Hypothesis .....                  | 37 |
| 41 | Primary Outcome .....                                           | 37 |

|    |                                                                                               |    |
|----|-----------------------------------------------------------------------------------------------|----|
| 42 | Primary Analysis.....                                                                         | 37 |
| 43 | Statistical model and approach .....                                                          | 37 |
| 44 | Figure 11.1: Projected BMI trajectories over time.....                                        | 39 |
| 45 | Assumptions with Justification.....                                                           | 39 |
| 46 | Missing data including level of attrition, lost to follow-up, and missing data treatment..... | 40 |
| 47 | Detectable Difference, Sample Size, and Power .....                                           | 42 |
| 48 | Analysis for Possible Effect Modifiers .....                                                  | 44 |
| 49 | Analysis for Possible Effect Mediators .....                                                  | 44 |
| 50 | Secondary Hypotheses and Analysis.....                                                        | 44 |
| 51 | Additional Analyses .....                                                                     | 46 |
| 52 | References.....                                                                               | 49 |
| 53 | Revised Protocol.....                                                                         | 53 |
| 54 | Specific Aims .....                                                                           | 53 |
| 55 | Background.....                                                                               | 54 |
| 56 | Recruitment.....                                                                              | 58 |
| 57 | Informed Consent .....                                                                        | 59 |
| 58 | Inclusion Criteria: .....                                                                     | 60 |
| 59 | Exclusion Criteria .....                                                                      | 61 |
| 60 | Study Procedural Overview .....                                                               | 62 |
| 61 | Outcome Measures & Procedures.....                                                            | 67 |
| 62 | Description of Measures .....                                                                 | 72 |
| 63 | Anthropometric Measurements .....                                                             | 72 |
| 64 | Triceps Skinfolds.....                                                                        | 72 |
| 65 | Accelerometers .....                                                                          | 72 |
| 66 | Energy Intake .....                                                                           | 73 |
| 67 | Study Questionnaire.....                                                                      | 73 |
| 68 | Metro Parks Staff Questionnaire on Preschool Programs.....                                    | 73 |
| 69 | Social Networks.....                                                                          | 74 |
| 70 | Patient Activation Survey .....                                                               | 74 |
| 71 | Genetics/Epigenetics.....                                                                     | 74 |
| 72 | Pregnancy Sub-Cohort (GROW Baby).....                                                         | 74 |
| 73 | Family Functioning .....                                                                      | 75 |
| 74 | Household Social Network Relationships.....                                                   | 75 |
| 75 | Qualitative Semi-Structured Interviews .....                                                  | 75 |
| 76 |                                                                                               |    |

|     |                                                                                           |     |
|-----|-------------------------------------------------------------------------------------------|-----|
| 77  | Control Measures .....                                                                    | 76  |
| 78  | Incentives .....                                                                          | 78  |
| 79  | Data Collection Incentives .....                                                          | 78  |
| 80  | Intervention Incentives .....                                                             | 79  |
| 81  | Health-related Incentives .....                                                           | 80  |
| 82  | Randomization .....                                                                       | 80  |
| 83  | Risk/Benefit Analysis .....                                                               | 81  |
| 84  | Data Safety and Monitoring Plan .....                                                     | 82  |
| 85  | Policy for Blinding in COPTR .....                                                        | 83  |
| 86  | Study Design, Statistical Consideration and Analysis Plan .....                           | 91  |
| 87  | Study Design .....                                                                        | 91  |
| 88  | Primary Research Question and Hypothesis .....                                            | 91  |
| 89  | Primary Outcome .....                                                                     | 91  |
| 90  | Primary Analysis .....                                                                    | 92  |
| 91  | Detectable Difference, Sample Size, and Power .....                                       | 95  |
| 92  | Analysis for Possible Effect Modifiers .....                                              | 97  |
| 93  | Analysis for Possible Effect Mediators .....                                              | 97  |
| 94  | Secondary Hypotheses and Analysis .....                                                   | 98  |
| 95  | Additional Analyses .....                                                                 | 99  |
| 96  | References .....                                                                          | 103 |
| 97  | Summary of all Amendments of the GROW Trial .....                                         | 106 |
| 98  | Original Statistical Analysis Plan Reviewed and approved by the DSMB in April, 2012 ..... | 108 |
| 99  | Final Statistical Analysis Plan Finalized in November, 2016 .....                         | 110 |
| 100 | Summary of Primary Analysis Adjustments, Clarifications and Specifications .....          | 113 |

101  
102  
103

104 **Original Protocol**

105

106 **Specific Aims**

107 This research includes one primary and five secondary specific aims:

108

109 *Primary Aims:*

110 **1. Aim 1:** Evaluate the efficacy of a multi-level intervention, addressing nutrition and  
111 physical activity, at public community recreation centers with high-risk parent- preschool  
112 child (ages 3-5) dyads to promote pediatric obesity prevention.

113 **1.1. Hypothesis 1:** The BMI trajectories of children in the treatment group will accelerate  
114 at a slower rate than those in the control group over time.  
115

116 *Secondary Aims:*

117 **2. Aim 2:** Compare the effect of the intervention in children whose parents made  
118 significant changes in their dietary and/or physical activity behaviors to the effect in  
119 children whose parents did not.

120 **2.1. Hypothesis 2:** Relative to children in the control condition, children participating in  
121 the treatment condition will:

122 **2.1.1.** Have lower sedentary activity levels (as measured by actigraphy data) after  
123 the intensive phase of the intervention (T2) and at study completion and

124 **2.1.2.** Have better adherence to age-specific USDA nutrition recommendations,  
125 (e.g., age-appropriate total calories increased fruits and vegetables, decreased  
126 sugar sweetened beverages [measured via diet recall data]), after the intensive  
127 phase (T2) and at study completion.  
128

129 **3. Aim 3:** Evaluate the effect of parents' physical activity levels and dietary behaviors on  
130 children's levels of the same.

131 **3.1. Hypothesis 3:** Parents who have significantly lower sedentary activity levels  
132 (compared to baseline) after treatment and who have better adherence to USDA  
133 nutrition recommendations (age-appropriate total calories increased fruits and  
134 vegetables, decreased sugar sweetened beverages [measured via diet recall data])

135 will be more likely than parents who have higher sedentary activity levels and who  
136 do not adhere to USDA nutrition recommendations to have children who will show

137 **3.1.1.** Decreased sedentary activity levels post-treatment and

138 **3.1.2.** Better adherence to USDA nutrition recommendations (as measured in 2.1.2,  
139 above)  
140

141 **4. Aim 4:** Explore the potential for developing new social networks and their effect on child  
142 nutrition and physical activity.

143 **4.1. Hypothesis 4:** Parents in the treatment group will develop new social networks and  
144 the strength of those social networks will be positively associated with reduced  
145 sedentary activity levels and improved dietary behaviors (measured as indicated  
146 above) among both parents and children.  
147

- 148       **5. Aim 5:** Evaluate the moderating relationship between genetic risk factors and child BMI  
149 trajectories over the course of the study.  
150       **5.1. Hypothesis 5:** Higher levels of child genetic susceptibility to obesity (i.e., a higher  
151 genetic risk score)<sup>1</sup> will be significantly associated with heavier-for-age BMI at  
152 baseline, and this susceptibility will moderate children’s growth in BMI over time.  
153
- 154       **6. Aim 6:** Assess the degree to which implementation of the GROW program encourages  
155 additional lifestyle programming for preschool children and their parents in the Metro  
156 Community Centers.  
157       **6.1. Hypothesis 6:** The two Metro Community centers participating in the GROW trial  
158 will implement a higher number of activity and or nutrition programs for families (as  
159 defined by the centers) with young children at the end of the study compared to non-  
160 participating Metro Community Centers.  
161

## 162 **Background**

### 163 ***Early childhood is a critical time for obesity prevention.***

164 Changes in physical activity and diet, among many other factors, have contributed to epidemic  
165 levels of childhood obesity in the U.S.<sup>2-6</sup> Obesity rates have tripled among children and  
166 adolescents over the past thirty years<sup>7,8</sup>, with Latino and African-American populations at  
167 disproportionately higher risk.<sup>4,8,9</sup> At the current rates of childhood obesity, 30 to 40% of today’s  
168 children may eventually develop type 2 diabetes and reduce their life expectancy.<sup>10</sup> Nader et al  
169 demonstrated that children who were ever overweight during the preschool period were five  
170 times as likely to be overweight adolescents.<sup>11</sup> And the chances of overweight increases as the  
171 child ages. In that same study, 80% of school-age children who were ever overweight during  
172 this period went on to become overweight adolescents. The significance of mounting risk for  
173 sustained overweight and its consequences cannot be overstated. In the Harvard Growth Study,  
174 overweight adolescents as adults had a two-fold increase in all-cause mortality and an  
175 increased morbidity due to cardiovascular disease.<sup>12</sup> It is not merely overweight/obesity in  
176 childhood that poses the risk for later increased mortality and morbidity as an adult, **the slope**  
177 **of early weight gain is a potent predictor.**<sup>13,14</sup> For example, Leunisson et al showed that rapid  
178 weight gain without concomitant growth in height during the first three months of infancy is  
179 linked with reduced insulin sensitivity in early adulthood. **Furthermore, Barker et al**  
180 **demonstrated that the risk of adult coronary events was more strongly related to the**  
181 **rapid childhood gain in BMI than to BMI attained at any particular age.**<sup>13</sup> **Consequently,**  
182 **this proposal will address prevention of rapid BMI gain during early childhood, fostering**  
183 **normal growth for those children who have a normal BMI (>50% and <85%) and**  
184 **improving BMI trajectories for those children who already have a BMI ≥ 85% <95% at**  
185 **ages 3-5 years.** There is little evidence documenting successful behavioral interventions to  
186 prevent early childhood obesity<sup>15-17</sup> and even less evidence concerning which factors may be  
187 crucial to success. Consequently, the Institute of Medicine (IOM)<sup>18,19</sup> and the *Strategic Plan for*  
188 *NIH Obesity Research*<sup>20,21</sup> call for a community-engaged, culturally-relevant, family-centered  
189 approach to obesity prevention that can be sustainable.

190

### 191 ***Family plays a crucial role in pediatric obesity prevention.***

192 Family influences normative expectations of how and what to eat as well as how often to be  
193 physically active.<sup>22,23</sup> Moreover, families control the home environment that shapes children's  
194 early childhood choices, establishing behavioral habits.<sup>24</sup> For example, in the Viva La Familia  
195 study, random 24-hour dietary recalls of almost 1000 children showed that 67% of children's  
196 meals occurred at home and that most of these meals were high density, low nutrient foods,  
197 consistent with their parents' choices.<sup>25</sup> Parental involvement in programs to reduce overweight  
198 in children has been moderately successful, and is considered an important component of  
199 weight loss programs targeting children.<sup>26,27</sup> Many of these programs were focused on  
200 treatment, however, the same association appears to exist for prevention efforts as reported in a  
201 recent meta-analysis of randomized trials to prevent childhood obesity.<sup>28</sup> Parents' role appears  
202 to be as both models to their children and as active participants in creating a healthy  
203 environment that encourages healthy lifestyles. Children are nearly six times more likely to be  
204 physically active if their parents are physically active.<sup>29</sup>

205 One important component of parental involvement is the use of behavior change methods such  
206 as parent-child contracting to set clear goals for nutrition and activity and self-monitoring of  
207 caloric intake and activity.<sup>27,30</sup> Epstein's report of 10-year treatment outcomes for obese children  
208 indicates long-term success among families who used parent-child contracts to set clear  
209 goals.<sup>27</sup> In a 2006 position paper, the American Dietetic Association (ADA)<sup>31,32</sup> recommended  
210 that effective, developmentally appropriate pediatric obesity interventions include the following  
211 elements:

- 212 1) Parent training/modeling (involving behavioral counseling targeted at parents to improve their  
213 parenting skills);
- 214 2) Behavior modification training (involving goal setting, modeling, and self-monitoring);
- 215 3) Promotion of physical activity (including the reduction of sedentary behaviors); and
- 216 4) Nutrition counseling/education (including the provision of more general information on foods,  
217 shopping, and nutrition to promote healthful eating).

218 ***Obesity is impacted by both the physical and social environment.***

219 It is not only the family that exerts influence over preschooler nutrition and physical activity  
220 habits, but both the physical and social environment.

221 ***Physical Environment:*** A developing area of research examines the impact of access to physical  
222 activity on increased activity levels. In a study by Wilson et al, access to physical activity such  
223 as neighborhood trails was associated with increased physical activity in low SES groups.<sup>33</sup>  
224 These same groups tend to have a higher likelihood of obesity.<sup>34</sup> Likewise, Sallis et al  
225 discovered that proximity of exercise facilities to one's home was associated with increased  
226 amounts of exercise.<sup>35</sup> Unfortunately, more physical activity barriers exist for residents living in  
227 poorer communities. For example, Estabrooks found that fewer free physical activity resources,  
228 such as parks and playground exist, in poorer communities.<sup>36</sup> Lack of affordable, safe, and  
229 accessible recreation facilities and programs have been cited as contributing to children's  
230 watching more TV at home, which in turn is associated with increased rates of obesity.<sup>5,37</sup>  
231 Creating links to free, accessible recreation would be especially important in areas where low  
232 SES populations live. **Public community centers provide access to physical activity for  
233 those populations at highest risk for obesity. Through our existing partnership between  
234 the Department of Pediatrics at Vanderbilt University Medical Center (VUMC) and Metro  
235 Parks and Recreation, we have the opportunity to conduct and test a community center  
236 based intervention that can reach this high risk population.**



237 ***Social Environment:*** Research now suggests that we have underestimated the influence of the  
238 social environment on shaping obesity-related behaviors. Social networks have been linked to  
239 obesity in adults and adolescents.<sup>38-41</sup> From a recently completed afterschool intervention  
240 (Gesell PI), we have initial support for our approach to spread physical activity through a newly  
241 developed network. Results indicated that children's existing friendships heavily influenced their  
242 routine level of physical activity. The strongest influence on the amount of time children spent in  
243 moderate-to-vigorous activity in the afterschool hours was the activity level of their immediate  
244 friends. Children consistently made adjustments to activity levels of 10% or more in order to  
245 emulate the activity levels of their peers (OR=6.89,  $p<.01$ ). The child's own age (OR=.92,  $p<.10$ )  
246 and obesity status (OR=.66,  $p<.10$ ) had statistically significant but relatively small direct effects  
247 on the individual's activity level. Gender had no direct effect on activity.<sup>42</sup> In another recently  
248 published study, we found that a new social network evolved among parents enrolled in a  
249 community-based obesity prevention RCT: Parents selectively formed friendship ties based on  
250 child BMI z-score, ( $t=2.08$ ,  $p<.05$ ), thus revealing the tendency for mothers to form new  
251 friendships with mothers whose children have similar body types.<sup>43</sup> Together, this work supports  
252 our proposition of utilizing the social influences of social networks that form during our  
253 intervention to amplify obesity-preventing behavior change. In the GROW intervention we will  
254 build new social networks through: frequent contact and facilitated interaction in structured small  
255 group activities.

256 Although the terms are often used interchangeably, social networks differ from social support.  
257 Social networks, the complex webs of social relationships and social interactions that connect  
258 individuals, have been shown to be strong influences on behaviors. Social support, however, is  
259 generally thought not to influence behavior, but rather be a mechanism to cope with challenges  
260 and facilitate recovery from illness, injury or disease.<sup>44</sup> Methodologically, social support is  
261 measured from the respondent's perspective to assess the support (e.g., emotional, cognitive,  
262 tangible support) an individual perceives to have, whereas social networks typically measure the  
263 presence or absence of friendships and task- or work-oriented relationships (which may or may  
264 not provide support) and treats the ties themselves as objects of study.<sup>45</sup> Social network  
265 analysis allows us to see the whole group of individuals and their interconnectedness, and is in  
266 that sense broader than analysis of social support. Due to a dearth of data and to  
267 methodological challenges, there are fewer studies of how social networks affect health.

268  
269 ***Genetic factors play a role in the development of obesity.***  
270 New research demonstrates a genetic risk score (GRS) is a potent predictor of BMI.  
271 Family studies have demonstrated that genetic factors account for anywhere between 40% and  
272 70% of the population variance in BMI for individuals with severe obesity.<sup>46,47</sup> Until recently,  
273 specific genes contributing to BMI in the general population had not been identified. It is now  
274 clear, however, that certain gene variants exert a substantial, clinically important effect on BMI  
275 in humans.<sup>48</sup> The GIANT Consortium recently reported the results from large scale studies to  
276 identify genetic variants contributing to the risk of obesity in both children and adults. In January  
277 2009, this consortium reported a meta- analysis involving over 100,000 patients, in which 8  
278 obesity-related risk alleles were conclusively validated far in excess of the standard ( $5 \times 10^{-7}$ )  
279 for genome-wide statistical significance.<sup>48</sup> Moreover, whereas each particular obesity  
280 susceptibility variant confers only a modest effect on BMI, a genetic risk score summing each  
281 individual's number of susceptibility variants across all 8 genes is a more potent predictor of  
282 obesity.<sup>48</sup> Table 1 below provides the details of the validated genetic associations, specifying  
283 the effect of each variant (allele) on BMI. All of the genes are on different chromosomes  
284 (unlinked), and therefore, were treated as an independent variable. Given that humans have  
285 two copies of every autosomal gene, each person has 0, 1, or 2 risk alleles at each locus, with a



286 genetic risk score (GRS) ranging from 0-16 (for 8 genes, given 2 alleles per locus, maximum  
287 score is 16). Even in the general population, at the extremes of GRS, BMI ranges from 25- 27  
288 are clearly associated with clinical obesity. A novel aspect of the present proposal is that it  
289 incorporates genetic data in relation to an interventional study to prevent early childhood  
290 overweight/obesity. It has now been conclusively demonstrated that specific genes predispose  
291 to obesity, yet their impact on early obesity prevention has not been studied. This critical  
292 question must be answered in order to translate the findings of genetic studies effectively into  
293 clinical practice.

294  
295 Prevention must occur in preschool given that 60% of overweight preschoolers will go on to  
296 become overweight adolescents.<sup>11</sup> By conducting and testing trials in public community  
297 centers, exportable interventions could result allowing for a macro-level system change to  
298 address this expanding public health crisis. **Building on the success of an existing  
299 partnership between Vanderbilt Pediatrics and Metro Parks and Recreation in Nashville,  
300 TN, the team in this proposal will conduct and evaluate an intervention intended to  
301 prevent obesity in preschoolers in an approach that affects multiple levels of risk and is  
302 both family-based and community-centered. This research includes the following  
303 innovations:**

- 304 1. Evaluates the trajectory of early BMI gain, as directed by recent scientific discoveries.<sup>13,14,49</sup>
- 305 2. Conducts a pediatric obesity prevention trial based in public community centers that are  
306 routinely available to the populations at highest risk.
- 307 3. Addresses obesity in the understudied period of early childhood – when there may be an  
308 optimal opportunity to instill long term healthy lifestyles and BMI trajectories.
- 309 4. Assesses the macro-system level components of community centers and social networks  
310 and the micro-system level components of parent-child genetics on pediatric obesity  
311 prevention
- 312 5. Is an easily exportable intervention, and we are actively exploring the opportunity to do so  
313 with the National Association of Counties and the National Recreation and Parks  
314 Association.

315

### 316 **Recruitment**

317 We will recruit 600 adult parents-preschool child dyads (p/c dyads) to participate in this study for  
318 3-years in duration (**see appendix B for recruitment script**). To help manage flow of  
319 participants at our community center and library performance sites, our sample (n=600 p/c  
320 dyads) will be broken down into 3 cohorts of 200 p/c dyads each. **See Table 1 for breakdown  
321 of cohort study implementation design.** Therefore, recruitment efforts will be on-going every  
322 year for the first 3-years to actively recruit 200 p/c dyads for each cohort (n=200 p/c dyads per  
323 cohort). In order to preserve internal and external validity of the study, the success of any  
324 behavioral intervention is contingent on the researcher's ability to recruit and retain study  
325 participants. Successful retention of this longitudinal study begins at recruitment.

326 Recruitment efforts consist of a multi-pronged strategy including: site- specific recruitment at  
327 community pediatric clinics, WIC offices, Family Resource Centers and Read to Succeed sites;  
328 study announcements on English and Spanish radio programs (**see appendix D for invitation  
329 letter, language and scripts will be based from this letter**); and bilingual study recruitment  
330 flyers (**see appendix C for recruitment flyers**) located at neighborhood organizational centers,  
331 Walmart, and other community agencies where families with young children gather (e.g.,

332 daycares, pre-K programs, churches). In addition to our passive approach, we will also actively  
333 recruit in these other community agencies where families with young children gather. In  
334 addition, we will identify “community liaisons”, well-respected persons considered deeply  
335 integrated in the community who have knowledge and relationships to easily reach and  
336 effectively communicate with our target population. Specifically, we will employ 3-6 community  
337 liaisons from each of the two communities (Northeast and South Nashville) to aid in recruitment  
338 and retention activities.

339 In order to assist in recruiting our hard-to-reach target population, we will also use Facebook as  
340 a viable tool for recruitment. Specifically, we will create a study-specific GROW Facebook page  
341 open to the general public that will serve as an online advertisement. All wording and language  
342 used for this Facebook page-will be similar to our hardcopy flyers that will be disseminated in  
343 the community (**see appendix C for recruitment flyers**). This page will give interested  
344 participants the opportunity to message research staff who can then schedule a follow-up phone  
345 call or meeting. Research staff will also have an opportunity to post status updates on upcoming  
346 recruitment efforts, for example radio announcements or upcoming community-based events  
347 related to the GROW study. Facebook features such as the “like” feature will be enabled  
348 whereby individuals that choose to “like” the GROW study page will be updated via their  
349 newsfeed (the center column of an individual’s homepage – a constantly updating list of stories  
350 from people and pages that they follow on Facebook) whenever our Facebook page updates  
351 our status. When individuals “like” this page, it also appears in their respective network’s  
352 newsfeeds, thereby potentially exposing the GROW page to other prospective participants.

353 From our GROW formative research pilot (IRB No. 100591), out of 439 parent/child dyads  
354 assessed for eligibility, only 50 parent/child dyads were eligible and participated at baseline; a  
355 10% return on investment. Due to the challenge of enrolling in a large, longitudinal, community-  
356 based, prevention trial, another strategy of recruitment will include outreach to patient families  
357 seen by either the Vanderbilt Pediatric Primary Care Clinic or surrounding community practices.  
358 To improve efficiency in light of our restrictive eligibility criteria, we will use Vanderbilt’s  
359 StarPanel, a computerized electronic medical record database and Vanderbilt’s Whiteboard, a  
360 scheduling database, to generate lists with scheduled clinic dates of potential participants that  
361 meet BMI, age and zip code eligibility criteria.<sup>50</sup> Specifically, clinic staff will provide a list of  
362 participants to research staff that meet eligibility criteria which serves as a pre-screen to identify  
363 targeted, potentially eligible, participants and invite them into the trial. With these lists, we will  
364 also send out an invitation letter to prospective participants that includes an opportunity to opt-  
365 out recruitment efforts whereby these families that do not wish to be called or approached in  
366 clinic’s waiting room, may contact research staff to opt out of receiving any recruitment phone  
367 calls or being approached on-site at clinic (**see appendix D for the invitation letter**).

368 The Monroe Carell Jr. Children’s Hospital at Vanderbilt Division of General Pediatrics serves  
369 families from Davidson County, caring for a panel of 15,000 patients, many of whom reside in  
370 the zip codes of interest (refer to letter of support). Ninety percent of patients qualify for  
371 Medicaid. Moreover, the Cumberland Pediatric Foundation, including more than 200 community  
372 pediatricians in middle Tennessee, will refer eligible parent-child dyads to the study (refer to  
373 letter of support). The majority of children served in these clinics are 5 years old and younger  
374 presenting for well-child examinations. Utilizing this multi-pronged, recruitment strategy, we plan  
375 to reach our required numbers of study participants.

376

377 **Informed Consent**

378 Informed consent will be obtained on the same day of baseline data collection. Prior to obtaining  
379 the informed consent, adult parents and their preschool-aged child will conduct a brief eligibility  
380 screening, specifically, re-measuring height and weight to confirm the eligibility requirement of  
381 the child's BMI (**see appendix G for script for consenting with children**). If the child  
382 participant meets BMI eligibility criteria ( $\geq 50\%$  and  $<95\%$ ) then the child will be escorted to an  
383 on-site child activity room, while the parent will be invited to initiate an informed consent  
384 process. Families that do not meet the eligibility criteria will receive a small token of our  
385 appreciation of their time and would not be eligible to participate for the specific cohort  
386 recruitment period; however if they become eligible for future cohort recruitment periods, they  
387 could be reassessed. Participants that do not meet eligibility criteria, data will be destroyed.

388 Informed consent will be obtained in a private space within a public meeting place of the  
389 community center before the initial baseline measurements. While both parents and all in the  
390 family are invited to attend sessions, only one adult (either mother or father) will be present for  
391 the consenting process and enrolled in the program, since the parent or legal guardian must be  
392 willing to commit to the 3-year study (see 11E below for eligibility criteria). During the consenting  
393 process, the child will be escorted to the childcare room located in another room at the  
394 community center.

395

396 For all consent forms, we will ask participating adults if they would prefer to use English or  
397 Spanish to understand their role in the research study. With their language of preference,  
398 informed consent forms will be handed to participating adults and then read and reviewed in the  
399 language of preference. We model our current informed consent on our recently completed  
400 study (IRB No. 100591). We include some critical questions to ask parents to ensure they  
401 understand the consent form before signing it. If the participant gives consent, they will sign and  
402 date one copy of the form and keep another for their reference; both forms are also signed and  
403 dated by the study team member obtaining the informed consent.

404

405 **Inclusion Criteria**

406 Eligibility inclusion criteria for participation in this study are as follows:

- 407 • Three-to-five year old children
- 408 • English- or Spanish-speaking
- 409 • Child's BMI  $\geq 50\%$  and  $<95\%$
- 410 • Parental commitment to participate in a three year study
- 411 • Consistent phone access
- 412 • Parent age  $\geq 18$  years
- 413 • Parents and children must be healthy, that is without medical conditions necessitating  
414 limited physical activity as evaluated by a pre-screen (**see appendices E & F**)
- 415 • Child completion of baseline data collection on height and weight, two diet recall  
416 sessions, and at least 4 days of accelerometry and all willing survey items completed by  
417 the parent
- 418 • Dyad must be considered underserved which will be indicated by the parents self-  
419 reporting if they or someone in their household participate in one of these programs or  
420 services: TennCare, CoverKids, WIC, Food Stamps (SNAP), Free and Reduced Price  
421 School Lunch and Breakfast, and/or Families First (TANF)

- 422 • Residence in one of two Nashville regions: **East Nashville/Region 1 (37206, 37207,**  
423 **37208, 37213, 37216, 37228)**: surrounding the East Community Center and **South**  
424 **Nashville/Region 2 (37013, 37204, 37210, 37211, 37217, 37220)**: surrounding the  
425 Coleman Recreation Center

426 For the purposes of this study we define the participating index “parent” as the legal guardian of  
427 the child who identifies that they spend the majority of time with that child at home. Other family  
428 members (e.g., grandmother, uncle/aunt, etc) may be recruited and enrolled in the program only  
429 if they have been granted legal guardianship via court order. During the consent process, legal  
430 documentation will be requested and stored for documentation purposes.

431 Per COPTR requirement, certain baseline data collection measures must be successfully  
432 completed prior to randomization. Once height and weight, at least two diet recall sessions, and  
433 at least four valid days of accelerometry from the child are completed, and all survey items  
434 families are willing to complete have been collected, parent-child dyads will be grouped into  
435 strata according to parent dominant language preference (English versus Spanish). After these  
436 requirements have been successfully completed, dyads within the strata will then be  
437 randomized to the intervention and control treatment groups.

#### 438 **Exclusion Criteria:**

- 439 • Children who are <50% BMI or ≥ 95%
- 440 • Children outside the specified age range
- 441 • Families who do not speak English or Spanish
- 442 • Lack telephone contact
- 443 • Lack parental commitment to participate consistently for a three-year period
- 444 • Parents and/or children who are diagnosed with medical illnesses where regular  
445 exercise might be contraindicated
- 446 • Children who display dissenting behaviors during baseline data collection
- 447 • Parents/children who do not otherwise meet the eligibility criteria listed in section above  
448 as determined by pre-screen

449 Inclusion Statement: **The GROW study operationally defines participants using the**  
450 **following inclusion criteria:**

451  
452 **Child:** Developmentally normal three-to-five year old children with a BMI ≥ 50% and <95%.  
453

454 **Adult:** Healthy (without medical conditions necessitating limited physical activity) adults age 18  
455 or older and designated as the child’s parent or legal guardian.  
456

457 **Family:** Speaks English or Spanish, resides in the defined vicinity of the intervention community  
458 center or control library, has a commitment to the 3-year study, has phone access, and resides  
459 in a household that participates in an assistance program for the underserved (e.g. TennCare,  
460 WIC, SNAP, free/reduced price school lunch).  
461

#### 462 463 ***Study Procedural Overview***

#### 464 465 **Figure 1: GROW Trial RCT Study Phase**

GROW RCT Design

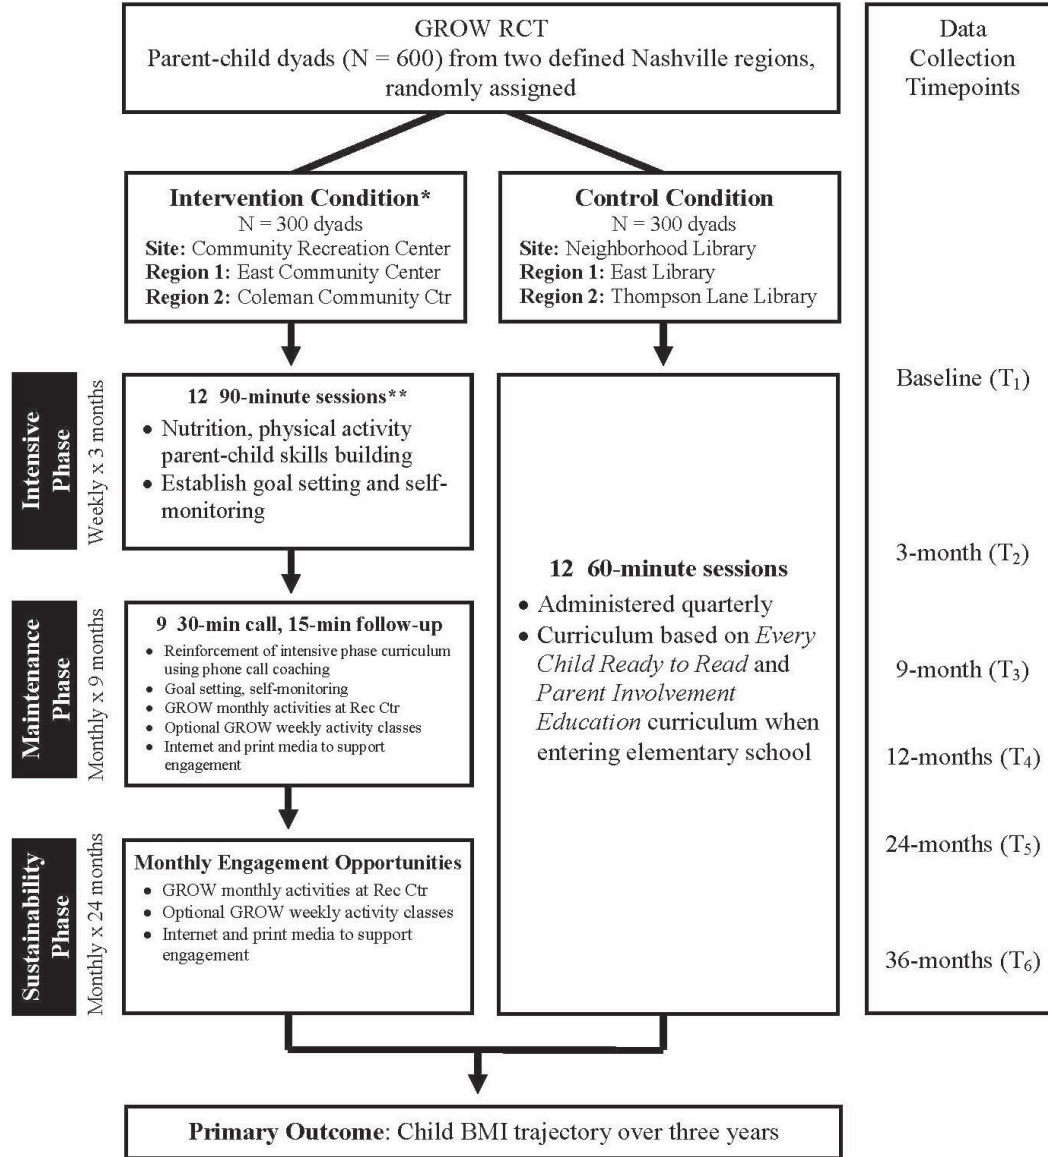

\*The intervention group will also receive the quarterly-administered control curriculum

\*\*All intervention sessions will include a tested curriculum with groups of up to 17 dyads and will promote social network development

466  
467

468 Three study waves or cohorts of participants (200 parent-child dyads each) will be invited into  
469 the study every year up to the 3<sup>rd</sup> year. In each cohort, 100 parent-child dyads will be  
470 randomized to the intervention; and 100 parent-child dyads will be randomized to the control  
471 condition. These dyads will be further broken down between two community recreational  
472 centers (intervention) and two libraries (control), subsequently 50 parent-child dyads will be  
473 participate at each site in each cohort. These 50 parent-child dyads will be further broken down  
474 and divided by their availability to attend group sessions during the week. **See Table 1 for**  
475 **Study Cohorts & Timeline.** This design: staggering intervention and control groups with 3  
476 cohorts over a span of a 5-year time period, will allow performance sites (i.e., community



477 centers and public libraries) to manage the flow of study participants in addition to serving their  
 478 typical number of patrons throughout the year.

479  
 480  
 481

**Table 1: Study Cohorts & Timeline**

| COHORT 1                  |                             |           |
|---------------------------|-----------------------------|-----------|
| Recruitment               | May 2012                    | 6 months  |
| Baseline data collection  | August 2012                 | 2 months  |
| Intervention              | September 2012              | 36 months |
| Follow-up data collection | 3, 9, 12, 24, and 36 months | 2 months  |
| COHORT 2                  | Start                       | Duration  |
| Recruitment               | December 2012               | 6 months  |
| Baseline data collection  | June 2013                   | 2 months  |
| Intervention              | June 2013                   | 36 months |
| Follow-up data collection | 3, 9, 12, 24, and 36 months | 2 months  |
| COHORT 3                  | Start                       | Duration  |
| Recruitment               | September 2014              | 6 months  |
| Baseline data collection  | March 2014                  | 2 months  |
| Intervention              | March 2014                  | 36 months |
| Follow-up data collection | 3, 9, 12, 24, and 36 months | 2 months  |

482

483 *Study Treatment Groups*

484 The intervention group will have three phases: 1) an intensive phase (weekly for 3 months) on  
 485 nutritional, physical activity and parenting skills-building via 90-min in-person sessions that  
 486 promote new social networks (**see appendix O for GROW Curriculum and refer to modules  
 487 attached**). One example of a module would be setting family goals around nutrition and  
 488 physical activity. We provide encouragement to utilize the built-environment for routine family  
 489 physical activity and access to healthy foods using internet/mail media, email and mail media; 2)  
 490 a maintenance phase (monthly for 9 months) via 30-min phone coaching calls to reinforce  
 491 concepts from phase one (**see appendix I**) and a brief 15-min follow-up call one week later (**see  
 492 appendix J**), continued encouragement through internet and mail media, the availability of  
 493 weekly activity programming for parent-preschool child dyads through the recreation centers,  
 494 and monthly 60-minute GROW events for families to reinforce key messages; and 3) a  
 495 sustainability phase (monthly for 24 months), where there is a discontinuation of phone call  
 496 coaching and continuation of the other elements from phase two. The three main pillars of  
 497 behavior change will be applied at each face-to-face and phone coaching session: 1) goal  
 498 setting; 2) self-monitoring to achieve those goals; and 3) problem-solving. Additionally, after  
 499 each measurement point in the intervention group, both the parent and child participants will  
 500 receive a feedback report on growth in the form of an age-and gender-appropriate BMI curve  
 501 with an explanation of how their child is growing as well as their own BMI information with an  
 502 explanation.

503

504 The control condition will have only one phase: 60-minute in-person sessions delivered  
 505 quarterly for 36 months, a total of 12 sessions over a period of 3-years. The core curriculum  
 506 training will involve developing parental skills while also creating a practice-based learning

507 environment for parent-child dyads around school success utilizing key elements of *Every Child*  
508 *Ready to Read*,<sup>51</sup> a project of the Association for Library Service to Children and the Public  
509 Library Association (**see appendix P for the Control Curriculum**). These sessions will be led  
510 by bilingual facilitators who are trained educators that work with the Nashville Public Library  
511 Foundation. As children age in the study and enter elementary school, the control parent-child  
512 dyad will receive a curriculum that integrates core elements from the *Parent Involvement*  
513 *Education* curriculum, tested and implemented by the *Parent Institute for Quality Education*  
514 (*PIQE*) to improve school success.<sup>52</sup>

515  
516 Data collection sessions will be conducted for both treatment groups at 6-points in time (T<sub>1</sub>-T<sub>6</sub>):  
517 baseline, 3-months, 9-months, 12-months, 24-months, and 36-months. Each of the six data  
518 collection points in this study will be conducted on-site at either community recreational center  
519 (i.e., Coleman and East Park) with Metro Parks staff and research staff. Metro Parks staff will  
520 not be “engaged” with research but will handle flow, childcare and check-in with participants.  
521 This data collection process will involve adult-child dyads to proceed through a variety of  
522 stations to gather measurements and information for study analysis.

523  
524 *Facebook use throughout the study for the Intervention Group*  
525 Since our targeted population are underserved families, such families have been well-known in  
526 the literature to be hard-to-reach and hard-to-keep families, especially over a 3 year period of  
527 time. Because of this challenge, Facebook has been considered a viable tool to retain and  
528 reach families, in addition, serve as an interactive tool to continually maintain engagement for  
529 participants in the GROW study (**see appendix H for Facebook messages**). Thus, all study  
530 participants in the intervention groups will be invited to join a private GROW Facebook group.  
531 Specifically, through our group page, members will receive reminders to upcoming  
532 sessions/community events, polls to gauge satisfaction and curriculum understanding, posts  
533 that display recipes, pictures, and videos, and links to helpful web pages for more information.  
534 In addition, Facebook group members will be able to post comments and pictures, and hopefully  
535 strengthen their social network ties amongst themselves. This Facebook group page will not be  
536 accessible to the general Facebook community nor the community in the control condition. Per  
537 Vanderbilt Social Media Policies, research staff will monitor content daily to ensure appropriate  
538 discourse and interaction that uphold the standards of Vanderbilt as an institution. For those  
539 families that do not have a Facebook account, emails and/or regular mail will be sent out  
540 monthly.

541  
542 *The Adaptive Intervention Design*

543 The research team plans to utilize an adaptive intervention approach<sup>53</sup> for children who are not  
544 responding to the intervention based on their BMI trajectories. More simply, for the purposes of  
545 this adaptive intervention, a child will be considered a non-responder if her/his BMI weight  
546 categorization shifts negatively from T1 to T2 (i.e., if formerly normal weight child shifts to  
547 overweight or obese in this period of time; or if formerly overweight child shifts to obese, as  
548 defined by BMI). Child BMI change from T1 to T2 will be reported using an easily  
549 understandable and comprehensive growth feedback report and mailed to the parents after T2  
550 measurements are collected. The adaptive intervention will occur at the first phone call coaching  
551 session of the maintenance phase. The coach will review the feedback report with the parent  
552 and solicit from the parent both the successes and barriers faced with incorporating GROW  
553 lessons into their everyday lives (responders will also receive feedback reports but will not  
554 receive a report explanation session discussed by a phone call coach). These adaptive  
555 intervention report feedback sessions will occur again after BMI categorization/non-responder  
556 status is reassessed at the T3, T4, and T5 data collection time points.

557



558 **Outcome Measures & Procedures**

559 *Primary Outcome*

560 The primary outcome for this study is the child’s BMI Percentile. Collected overtime through six  
 561 data collection points, the change of BMI% will be used to assess the trajectory of the child’s  
 562 growth during the study duration. Additional anthropometric measures correlated with BMI and  
 563 more specific in identifying adiposity will also be collected, such as triceps skin fold and waist  
 564 circumference. Together, these measures yield a stronger indication of the rate of adiposity and  
 565 the BMI trajectory overtime during a child’s formative years of child development. **See Table 2:**  
 566 **Primary Outcomes below for details.**

567 Table 2: Primary Outcomes

| Domain                                | Measurement Tool   | Description                    | Respondent [Parent (P) or Child (C)] | Method                               | Collection Time                 |
|---------------------------------------|--------------------|--------------------------------|--------------------------------------|--------------------------------------|---------------------------------|
| <b>Early Childhood BMI Trajectory</b> | Scale, stadiometer | Change in BMI% over time       | C                                    | Weight (kg)/height (m <sup>2</sup> ) | T <sub>1</sub> – T <sub>6</sub> |
| <b>Body Fat % (Triceps Skin Fold)</b> | Caliper            | Change in % body fat over time | C                                    | Staff measured                       | T <sub>1</sub> – T <sub>6</sub> |
| <b>Waist Circumference</b>            | Measuring tape     | Change in waist circumference  | C                                    | Staff measured                       | T <sub>1</sub> – T <sub>6</sub> |

568

569 *Secondary Outcome*

570 A secondary outcome of this study is parental BMI. Similar to the reasons above, additional  
 571 anthropometric measures will also be included to assist in identifying a more precise measure of  
 572 adiposity and BMI trajectory overtime. Since the focus of our intervention is both the child and  
 573 the parent to improve health. **See Table 3: Secondary Outcomes below for details.**

574

575 Table 3: Secondary Outcomes

| Item                                  | Measurement Tool   | Description                    | Respondent [Parent (P) or Child (C)] | Method                               | Collection Time                 |
|---------------------------------------|--------------------|--------------------------------|--------------------------------------|--------------------------------------|---------------------------------|
| <b>BMI</b>                            | Scale, stadiometer | Change in BMI over time        | P                                    | Weight (kg)/height (m <sup>2</sup> ) | T <sub>1</sub> – T <sub>6</sub> |
| <b>Body Fat % (Triceps Skin Fold)</b> | Caliper            | Change in % body fat over time | P                                    | Staff measured                       | T <sub>1</sub> – T <sub>6</sub> |
| <b>Waist Circumference</b>            | Measuring tape     | Change in waist                | P                                    | Staff measured                       | T <sub>1</sub> – T <sub>6</sub> |

|  |  |               |  |  |  |
|--|--|---------------|--|--|--|
|  |  | circumference |  |  |  |
|--|--|---------------|--|--|--|

576

577 *Collection of Moderators & Mediators*

578 Conceptually, moderators identify on whom and under what circumstances the study treatment  
 579 have different effects. In contrast, mediators identify why and how the treatment works or  
 580 doesn't work. Below is a table including all moderators and mediators identified for this study,  
 581 the measurement tool, a brief description, the intended respondent, method and time point of  
 582 data collection. **See Table 4: Collection of Moderators & Mediators below for details.**

583 Note: Computerized surveys are electronic surveys from the REDCap Database that will be  
 584 administered and completed at the community center; no procedures will be conducted at  
 585 Vanderbilt nor at home. Once entered and saved, the data will be housed on a Vanderbilt  
 586 server. REDCap provides the ability to enter measurement data, including basic mathematic  
 587 and logic checks for verifying valid data, as well as survey data. The research staff will utilize a  
 588 combination of the wireless internet at the community center and mobile hotspots to provide  
 589 internet access for all computers used.

590 Table 4: Collection of Moderators & Mediators

| Domain                   | Measurement Tool                                                 | Description                                                                                              | Respondent [Parent (P) or Child (C)] | Method                                                         | Collection Time                                                   |
|--------------------------|------------------------------------------------------------------|----------------------------------------------------------------------------------------------------------|--------------------------------------|----------------------------------------------------------------|-------------------------------------------------------------------|
| <b>Physical Activity</b> | Accelerometer (GT3X+)                                            | Sedentary activity (% sedentary mins/total wearing time)                                                 | P, C                                 | Parent and child accelerometer wear (≥4 days, ≥6 hrs/day)      | T <sub>1</sub> , T <sub>2</sub> , T <sub>4</sub> , T <sub>6</sub> |
|                          | GROW developed survey questions related to intervention messages | Self-reported physical activity habits                                                                   | P                                    | Computerized Survey (2Q)                                       | T <sub>1</sub> – T <sub>6</sub>                                   |
| <b>Nutrition</b>         | Diet Recall<br><br>Parent's<br><br>Child's                       | Total calories and macronutrient content (% fat, protein, carbohydrate) adherent to USDA recommendations | P                                    | 3-day parent and child diet recall (parental report for child) | T <sub>1</sub> , T <sub>2</sub> , T <sub>4</sub> , T <sub>6</sub> |

|                            |                                                                  |                                                                        |   |                           |                                       |
|----------------------------|------------------------------------------------------------------|------------------------------------------------------------------------|---|---------------------------|---------------------------------------|
|                            | GROW developed survey questions related to intervention messages | Parent and child eating and feeding habits                             | P | Computerized Survey (8Q)  | T <sub>1</sub> – T <sub>6</sub>       |
| <b>Social Network</b>      | GROW developed Social Network Survey                             | Assessing social networking and its influence on behavior modification | P | Computerized Survey (20Q) | T <sub>1</sub> – T <sub>6</sub>       |
|                            | Bollen & Hoyle Perceived Cohesion Scale                          | Assessing group cohesion<br>Assessing information sharing              | P | Computerized Survey (6Q)  | T <sub>1</sub> , Wk 4, T <sub>6</sub> |
|                            | GROW developed Advice Scale                                      |                                                                        | P | Computerized Survey (2Q)  | T <sub>1</sub> , Wk 4, T <sub>6</sub> |
| <b>Parenting Practices</b> | Toddler Feeding Questionnaire (TFQ)                              | Parenting approaches to child feeding                                  | P | Computerized Survey (31Q) | T <sub>1</sub> – T <sub>6</sub>       |
|                            | Child Feeding Questionnaire (CFQ)                                | Parenting beliefs on child feeding                                     | P | Computerized Survey (3Q)  | T <sub>1</sub> – T <sub>6</sub>       |

|                                            |                                                                  |                                                                             |   |                           |                                 |
|--------------------------------------------|------------------------------------------------------------------|-----------------------------------------------------------------------------|---|---------------------------|---------------------------------|
| <b>Eating Together</b>                     | Healthy Habits Healthy Kids (HHHK) - Eating Behaviors subscale   | How often meals are eaten together                                          | P | Computerized Survey (3Q)  | T <sub>1</sub> – T <sub>6</sub> |
|                                            | GROW developed survey questions related to intervention messages | Where meals are eaten together                                              | P | Computerized Survey (3Q)  | T <sub>1</sub> – T <sub>6</sub> |
| <b>Sleep</b>                               | GROW developed survey questions related to intervention messages | Parent and child sleeping habits                                            | P | Computerized Survey (6Q)* | T <sub>1</sub> – T <sub>6</sub> |
| <b>Media Use</b>                           | Stanford (GEMS/ ECHALE) developed questions                      | Media available in household                                                | P | Computerized Survey (3Q)  | T <sub>1</sub> – T <sub>6</sub> |
|                                            | Youth Risk Behavior Survey (YRBS) subscale                       | Child's media use                                                           | P | Computerized Survey (3Q)  | T <sub>1</sub> – T <sub>6</sub> |
| <b>Use of Rec Center</b>                   | GROW developed survey questions related to intervention messages | Parent and child knowledge and use of rec center outside of GROW activities | P | Computerized Survey (3Q)  | T <sub>1</sub> – T <sub>6</sub> |
| <b>Perception of the Built Environment</b> | Participant Physical Activity and Neighborhood Supports Survey   | Parent knowledge of the resources in the built environment                  | P | Computerized Survey (40Q) | T <sub>2</sub>                  |
| <b>Stress</b>                              | Cohen's Perceived Stress Scale (PSS)                             | Assesses current levels of parental stress                                  | P | Computerized Survey (10Q) | T <sub>1</sub> – T <sub>6</sub> |

|                                    |                                                                                |                                                                     |      |                           |                                 |
|------------------------------------|--------------------------------------------------------------------------------|---------------------------------------------------------------------|------|---------------------------|---------------------------------|
| <b>Depression*</b>                 | Center for Epidemiological Studies-Depression Scale (CES-D)                    | Assesses levels of parental depression                              | P    | Computerized Survey (20Q) | T <sub>1</sub> – T <sub>6</sub> |
| <b>Goal Setting and Monitoring</b> | GROW developed survey questions related to intervention messages               | Ability to set and track goals                                      | P    | Computerized Survey (6Q)  | T <sub>1</sub> – T <sub>6</sub> |
| <b>Executive Functioning</b>       | Stephanie Carlson's Executive Function Scale for Preschoolers                  | Comprehensive executive functioning measure                         | C    | Hands-on Tasks            | T <sub>1</sub> , T <sub>6</sub> |
| <b>Literacy</b>                    | Receptive One-Word Picture Vocabulary Test, 4 <sup>th</sup> edition (ROWPVT-4) | Child literacy aptitude                                             | C    | Hands-on Task             | T <sub>1</sub> , T <sub>6</sub> |
| <b>Weight Perception</b>           | COPTR common survey questions                                                  | Current perception of parent's and child's weight                   | P    | Computerized Survey (2Q)  | T <sub>1</sub> – T <sub>6</sub> |
| <b>Self-Efficacy</b>               | Parenting Sense of Confidence (PSOC) Scale                                     | Confidence around parenting decisions                               | P    | Computerized Survey (16Q) | T <sub>1</sub> – T <sub>6</sub> |
| <b>Demographics</b>                | GROW developed survey questions                                                | Demographic information                                             | P    | Computerized Survey (17Q) | T <sub>1</sub>                  |
| <b>Genotype</b>                    | Oragene kit (adult), baby brush (child)                                        | Genetic risk score                                                  | P, C | Genotyping saliva         | T <sub>1</sub>                  |
| <b>Perinatal Health</b>            | Updated questions from KA Dept of Health WIC intake                            | Maternal gestational health, birth weight, and breastfeeding habits | P    | Computerized Survey (5Q)  | T <sub>1</sub>                  |
| <b>Health Literacy</b>             | The Newest Vital Sign (NVS)                                                    | Understanding food label information                                | P    | Computerized Survey (6Q)  | T <sub>1</sub>                  |
| <b>Food Security</b>               | USDA 2008                                                                      | Financial barriers                                                  | P    | Computerized              | T <sub>1</sub>                  |

|                     |                                                                   |                                            |   |               |                |
|---------------------|-------------------------------------------------------------------|--------------------------------------------|---|---------------|----------------|
|                     | subscale                                                          | affecting availability of food in the home |   | Survey (6Q)   |                |
| <b>Intelligence</b> | Woodcock-Johnson III Tests of Cognitive Abilities – Brief Battery | Standard intelligence measurement          | C | Hands-on Task | T <sub>1</sub> |

591 \*Participant will be alerted and provided appropriate resources for treatment if CES-D total score  
592 indicates severe depression (i.e., a CES-D total score of 27 or greater).

593 **Process Measures**

594 The GROW trial process measures will include: participation rates collected via attendance logs;  
595 data collection process collected via timed logs and identification of any issues that arise during  
596 the data collection procedures; retention barriers and facilitators via call logs conducted by the  
597 study team; session fidelity checks to ensure consistency and accuracy of content  
598 administration; logs to assess use of recreation center and library outside of mandatory GROW-  
599 related sessions; Metro Parks and Recreation facility staff satisfaction surveys to assess  
600 barriers and facilitators of conducting the research program within their facility; library facility  
601 staff satisfaction surveys to assess barriers and facilitators of conducting the research program  
602 within their facility; and parent-child satisfaction with study participation.

603

604 **Description of Measures**

605

606 **Anthropometric Measurements**

607 Body weight for each subject will be measured, after voiding and wearing light clothing, to the  
608 nearest 100 g on a calibrated digital scale. Body height without shoes will be measured to the  
609 nearest 0.1 cm with a stadiometer. BMI will be calculated (weight [kg]/height [m<sup>2</sup>]), using the  
610 standard CDC calculator. Both height and weight measures will be collected twice. The mean of  
611 the two closest measures is used as a final measurement. Children will be wearing light clothes  
612 and without shoes. Height without shoes will be measured to the nearest 0.1 cm using our  
613 standard stadiometer (Perspective Enterprises, Portage, MI). Adult and child waist  
614 circumference will be measured with a fiberglass measuring tape on the skin, at the umbilicus,  
615 to the nearest 0.1 cm, according to the recommendations of the World Heart Federation.<sup>54</sup> Waist  
616 circumference will be collected two times, if the two measurements of waist differ by 1 cm or  
617 more, then the waist measurements are repeated a third time and data entered. The mean of  
618 the two closest measures is used as a final measurement. Measurements will be obtained by  
619 trained project staff and standardized according to accepted standards.<sup>55-57</sup>

620

621 **Triceps Skinfolts**

622 Triceps skinfold thickness is a measure of subcutaneous fat and is a component of equations  
623 used to predict body fat composition.<sup>58</sup> SFs have been used successfully in studies with adults  
624 and children,<sup>59-61</sup> including young children from 3 to 8 years of age.<sup>62,63</sup> Recent literature  
625 suggests that SFs are more accurate in estimating body composition compared to bioelectrical  
626 impedance (BIA) during the adiposity rebound, the normal pattern of growth that occurs in all  
627 children growing between 3 to 5 years of age.<sup>62</sup> SF is measured using a Lange skinfold caliper

628 in the midline of the posterior aspect (back) of the arm, over the triceps muscle, at a point  
629 midway between the lateral project of the acromion process of the scapula (shoulder blade) and  
630 the inferior margin (bottom) of the olecranon process of the ulna (elbow). They are measured to  
631 the nearest 0.1 mm and collected two times. A third SF measurement is taken if either of the  
632 following occur: 1) If the two triceps values are less than 10mm but differ by 2 mm or more; or 2)  
633 If the skinfold is 10mm or larger, with a difference between the two measurements of greater  
634 than 10% (((maximum-minimum)/minimum)\*100). In either case, the mean of the two closest  
635 measures is used as the final measurement. In order to accommodate participants that are  
636 morbidly obese participants then we will use the Harpenden calipers. Training, certification and  
637 quality control procedures for SFs are similar to those outlined above for waist circumference  
638 and other anthropometrics.  
639

#### 640 Accelerometers

641 Amount of physical activity will be assessed using the ActiGraph GT3M (Actigraph LLC, Ford  
642 Walton, FL) accelerometer. Accelerometry had been used successfully in studies with adults  
643 and children<sup>64-68</sup> with a reliability:  $r = 0.93$ <sup>69</sup>. Both a parent and a child will be asked to wear  
644 the monitor for one week during waking and sleeping hours except when bathing, showering, or  
645 swimming. A simple 1-page manual (in Spanish and English) will be provided. The monitor will  
646 be attached to a belt secured at the waist. The monitors will be sent by mail in pre-addressed  
647 and pre-stamped boxes to the Energy Balance Laboratory at Vanderbilt. We have used this  
648 technique very successfully in similar studies with children and their families. The activity data  
649 will be downloaded to a computer and analyzed. Physical activity will be expressed as activity  
650 counts per day. Total and physical activity energy expenditure (kcal/day) will be calculated using  
651 validated equations.<sup>69,70</sup> Threshold values from a validation study will be used to calculate time  
652 spent in sedentary, light, moderate, and vigorous activity. Accelerometer use will be  
653 supplemented with a short physical activity log that collects physical activities and time of  
654 accelerometer use (hours/day).  
655

#### 656 Energy Intake

657 We will obtain detailed data on foods and nutrients associated with energy balance and weight  
658 management from total dietary intakes (foods, beverages and snacks): energy intakes, energy  
659 density, macronutrient intakes, added sugars, as well as consumption of specific foods and food  
660 groups that are excessively high (Sugary Sweetened Beverages, desserts) or inadequate (fruits,  
661 vegetables, milk and dairy products, whole grains and fiber) in the typical diets of U.S. children.  
662 It is understood that accurate assessment of dietary intakes of free-living individuals is a  
663 challenging process and there is no single method that is without limitations. To optimize the  
664 accuracy of the assessment of dietary intake data, we will conduct 24-hour dietary recalls using  
665 the USDA multi-pass method administered by trained diet recall technicians. Recalls will be  
666 performed to capture the average of dietary intakes from 2 nonconsecutive week days and 1  
667 weekend day during the 14-day period of each main study time-point. Diet recall will occur via  
668 three phone sessions conducted by the two master trainers at the University of North Carolina  
669 (UNC) at Chapel Hill over a maximum of a 30-day period to collect complete participant  
670 information. All master trainers will participate in a central in-person training organized by the  
671 Research Coordinating Unit (RCU) located at UNC. No diet recalls will be conducted until after  
672 the trainer has been trained and certified. Parents will report on themselves and on their child.  
673 Analyses will not include data that indicates unrealistically low (eg, <600kcal/d) or high intakes



674 (eg, >4000kcal/d). Dietary data will be entered and analyzed using our NDS-R software  
675 (Nutrient Data System for Research, St. Paul, MN). Added sugars will be calculated using the  
676 USDA database (<http://www.ars.usda.gov/Services/docs.htm?docid=12107>)  
677

#### 678 Study Questionnaire

679 The study questionnaire will measure a variety of domains and will be provided in both English  
680 and Spanish (**see appendix K for survey**). It will be a computer-administered questionnaire  
681 completed by parents with paper and pencil questionnaire as back-up. **See Table 4: Collection**  
682 **of Moderators & Mediators above for details**. Survey takes about 30-45 minutes to complete.  
683

#### 684 Social Networks

685 We will collect social network data, exploring the potential development of new social ties that  
686 could result due to the structure of the study (**see appendix L**).  
687

#### 688 Genetics

689 Saliva will be collected from the parent-child dyad participating in the study<sup>71</sup>. For adults, saliva  
690 will be obtained utilizing the Oragene saliva kit, collecting 2-3 cc of saliva per participant. For  
691 young children, saliva will be obtained utilizing the “baby brush” approach, in which small  
692 sponges attached to plastic handles are inserted between cheek and gumline to absorb saliva.  
693 Subsequently, the sponges (x4) are cut and placed in the spittoon with DNA preservation  
694 solution. We will then use a modification of the Puregene DNA (Gentra, Inc) Purification  
695 Protocol for 4 ml Saliva Samples<sup>71</sup>, consisting of 4 stages: (1) cell lysis and addition of RNase  
696 to remove RNA from the salivary nucleic acid; (2) DNA precipitation in 100% isopropanol, with  
697 70% ethanol wash; (3) DNA hydration in reduced TE (Tris EDTA) to approximate concentration  
698 of 200 ng/u; (4) DNA storage at 4C for working stock, and -80C for archival DNA samples.  
699

#### 700 Barriers to Physical Activity Questionnaire

701 This study survey is based from the *Environmental Supports for Physical Activity*  
702 *Questionnaire*<sup>72</sup> to assess individual perceptions of physical activity supports in the social and  
703 physical environment, use of the built environment, current physical activity behavior and  
704 recreation center use. This survey will take about 15-20 minutes to complete and has been  
705 validated in previous literature.<sup>73</sup> These data will help describe the policy environment of study  
706 participants and identify policies that enable or constrain active living for participants. The  
707 objective of this survey is to link current behavior with local community policies. Specifically, to  
708 determine specific neighborhood characteristics that enable or constrain participant ability to be  
709 physically active, match participant responses to one of the three policy types: personal safety,  
710 transportation, and land use, describe local and state policies that address participant  
711 responses, and identify untapped policy options for improving physical activity levels in  
712 participant communities.  
713

#### 714 Control Measures

715 The study will use Stephanie Carlson’s Executive Function Scale for Preschoolers to determine  
716 a comprehensive measure of executive functioning in the child participants of the study. The  
717 battery of hands-on tasks (e.g. card sorting) will be administered by a trained data collector one-  
718 on-one to each child and is estimated to take approximately 10 minutes. To measure

719 intelligence of the child participants, the research team will use the Woodcock-Johnson III Tests  
 720 of Cognitive Abilities – Brief Battery. This tool involves a battery of tasks where children  
 721 expressively (verbally and/or through pointing) respond to an assortment of pictures and words  
 722 in a flipbook. Trained data collectors will administer this test individually with each child. The  
 723 brief battery is estimated to take between 15 and 20 minutes to administer.  
 724

725

726 **Incentives**

727

728 **Data Collection Incentives**

729 After each data collection session, participating families will receive gift cards of varying  
 730 amounts throughout the duration of the 3-year trial (See Table 5 below for details). At times 1, 2,  
 731 and 4 participants will receive \$40. At times 3 and 5 participants will receive \$15 gift card. One  
 732 the final data collection time, participants will receive \$50. Please see the table for additional  
 733 information.

734 Table 5: Data Collection Incentives

| <b>Data Collection Point</b> | <b>Amount</b> | <b>When</b>       |
|------------------------------|---------------|-------------------|
| <b>T1 (Baseline)</b>         | \$40.00*      | At randomization  |
| <b>T2</b>                    | \$40.00*      | Pick up day       |
| <b>T3</b>                    | \$15.00       | Immediately after |
| <b>T4</b>                    | \$40.00*      | Pick up day       |
| <b>T5</b>                    | \$15.00       | Immediately after |
| <b>T6</b>                    | \$50.00*      | Pick up day       |

735 \*Participants will receive half of the incentive upfront prior to wearing accelerometers and the other half  
 736 upon return and completion of at least 2 of the 3 diet recalls.  
 737

738 **Intervention Incentives**

739 **Intensive Phase:** Participants will receive tangible tools or small giveaways during each session.  
 740 The value of these items will be approximately \$3.50 per parent and child dyad each week when  
 741 sessions occur. Examples of tangible tools, items to reinforce lessons learned are kitchen ware  
 742 utensils, measuring spoons, etc. In addition to the tangible tools, in order to encourage  
 743 attendance during the intensive phase of the intervention (weekly for 3-months), participants will  
 744 have an opportunity to enter a raffle. These raffles will be held during sessions 3, 6, 9, and 12  
 745 (see table 6 below for details). The odds of winning the raffle in the intervention group is about  
 746 1:15, assuming that on average there are 15 people in attendance each week. Notably, the  
 747 odds vary based on the number of sessions each person attends individually and the number of  
 748 attendees in the session. Moreover, there will be a separate raffle for each intervention group  
 749 for each cohort. Specifically, there will be between 6-8 intervention groups per cohort (3-4  
 750 groups per site). If participants attend all 12-sessions during the 3-month intensive phase,  
 751 participants will receive a value amounted of \$42 worth of small gifts.  
 752

753 Table 6: Data Collection Intervention Incentives

754

| <b>RAFFLE</b> | <b>ITEM*</b>            | <b>VALUE</b> |
|---------------|-------------------------|--------------|
| Session 3     | Hand mixer              | \$10.00      |
| Session 6     | Food storage containers | \$15.00      |

|            |                |         |
|------------|----------------|---------|
| Session 9  | Mixing bowls   | \$20.00 |
| Session 12 | Casserole dish | \$25.00 |
| TOTAL      |                | \$70.00 |

755 \*We may substitute items of similar value

756 Note: These items were based on a kitchen inventory administered by our nutrition team. 42-57% of  
757 those surveyed did not have these items.

758

759 **Maintenance Phase:** Participants will receive a coupon for a free fitness class of their choice  
760 valid at either community center location each month that coaching calls are completed  
761 (monthly for 9-months). Fitness classes such as zumba, line dancing, or yoga, etc are routine  
762 services offered to the general public at each of the community recreational centers. The value  
763 of this coupon is \$2.00. Participants that complete all 9-monthly phone coaching calls during the  
764 maintenance phase will receive a value of \$18 worth of fitness classes for 9-months.

765

766 **Maintenance and Sustainability Phase:** Participants will be invited to participate in classes  
767 and various community center events throughout the duration of the maintenance and  
768 sustainability phases. Apart from the fitness classes, which are offered by the community  
769 centers, we will offer GROW-related community events that focus on nutrition and/or physical  
770 activity with parents and children once per month throughout the duration of the 3-year trial. For  
771 each class or event attended, participants will receive one punch on their punch card. After  
772 every 6 punches, participants will redeem the punch card for a gift valued at \$5.00. These small  
773 gifts will include kitchen gadgets such as an apple corer, spatula set, wooden spoon set, etc. If  
774 participants attended every event during the 3-year trial, participants will have 5 opportunities for  
775 a gift valued at \$5.00, resulting in a total amount of \$25 worth of small gifts in 33-months  
776 (maintenance and sustainability phases).

777

778

779 Control Incentives

780 Similar to the intensive phase of the intervention incentives, all participants will receive tangible  
781 tools or a small giveaway during each session. The value of these items will be approximately  
782 \$5.0 per parent and child dyad when sessions occur. Examples of these giveaways are books,  
783 etc. If participants attended all sessions for 36-months, participants will receive a value of \$60  
784 worth of small gifts. In addition, at every session, all attendees will be entered in a raffle to win a  
785 \$20.00 gift card (quarterly for 36-months). Similar to the intervention group, the odds of winning  
786 the raffle in the control group is about 1:15, assuming that on average there are 15 people in  
787 attendance.

788

789 For both intervention and control groups, these additional incentives should not pose or be  
790 considered coercive since families had already consented to participate in the study. All  
791 incentives are tied specifically to participation within the trial and were recommended by families  
792 in our prior work in the GROW Formative Phase (IRB No: 100591).

793

794 Health-related Incentives

795 In addition to these incentives, all participants from both intervention and control groups in the  
796 study will receive family memberships to their respective community recreational center for one  
797 year, which allow adults to use the weight room for no cost, and families to take swimming  
798 lessons at 50% of the normal cost. These family memberships will be given to all intervention  
799 families during the study and all control families at the end of the study. Moreover, if families use  
800 the facility at least once per month, then their family membership will be extended year by year

801 up to 3-years. This will encourage families to utilize their built environment for family physical  
802 activity.

803  
804 The value of the parent and child gym membership for one year equates to \$400 at each  
805 community center. Although this may be interpreted as undue inducement for families to  
806 participate in a 3-year RCT study, providing gym membership to participants allows increased  
807 physical activity and healthy living - a direct benefit and positive health advantage to subject  
808 participants and their families as opposed to compensation of monetary or economic gains.  
809 Since increasing physical activity is directly related to the outcome of the study, we  
810 conceptualize offering gym memberships as a bonus and a justified benefit for those that have  
811 participated.

812

### 813 ***Randomization***

814

#### 815 Randomization Schedule

816 An identical randomization procedure will be followed for each of the three successive cohorts.  
817 Available software (e.g., SAS, Stata) will be used to generate a blocked randomization schedule  
818 per each strata, within both regions, resulting in 4 total schedules (2 language conditions x 2  
819 regions = 4). Block size will be randomly permuted with the software procedure (although no  
820 larger than 10), thereby insuring equal representation at intermittent recruitment points while  
821 minimizing the probability of correctly guessing subsequent condition assignment.

822

823 Each schedule will be identified by stratum and loaded into the recruitment database. The  
824 database security settings will be specified so that once loaded no one on the study team will  
825 have write privileges for the schedules, and only the statistician will have read privileges. These  
826 settings will prevent anticipation (except for the statistician) or subversion of the randomization  
827 process by any member of the study team.

828

#### 829 Random Assignment

830 Each potential dyad's contact information, including child age and dominant language use, will  
831 be loaded into the recruitment database upon identification as a potential participant and  
832 assigned a unique study identification number (family id). The recruitment database will follow  
833 each potential dyad from the point of identification through eligibility assessment and enrollment  
834 through disqualification or randomization. The recruitment database will track all eligibility and  
835 enrollment criteria and include a utility that checks still-eligible study candidates for criteria that  
836 must be met prior to randomization. Upon identifying dyads who have met all of these criteria,  
837 recruitment staff will engage a database utility that performs randomization by identifying the  
838 stratum into which each potential dyad should be randomized, and populating the next available  
839 slot in the appropriate randomization schedule with the dyad's family id. The database user will  
840 not be able to see, and will be unlikely to anticipate, the arm assignment (treatment versus  
841 control) for each dyad, especially when multiple dyads within a stratum are randomized at once.  
842 Once the dyad is assigned to an arm, a link is established between family id and arm  
843 assignment (treatment versus control). This link will not be writable by any study staff and will be  
844 viewable by the study statistician in the randomization schedules. Dyad's assignments will be  
845 viewable by all study staff on a case by case basis so that the daily activities of managing  
846 participants, both parents and their children, may be done without hindrance.

847

848 Randomization Data Management

849 The link between family id and arm assignment will be stored in the randomization schedule, to  
850 which only the statistician will have read access. All randomized dyads will remain in the  
851 recruitment database for the duration of the study so that recruitment and enrollment reports  
852 can be generated on demand by all study staff. By viewing a dyad's record, any study staff can  
853 view but not edit the dyad's arm assignment.

854 All dyads' family ids will be exported into a measurement database along with the fields  
855 necessary to conduct timely data collection and on-demand reporting by any study staff. Arm  
856 assignment will not be exported to the measurement database. As such, it will not be possible  
857 for measurement staff to know a dyads's arm assignment based on the information available in  
858 the measurement database.

859 In addition, once randomized, the family ids (both treatment and control) will be exported into an  
860 intervention database along with the fields necessary to conduct the treatment and control  
861 procedures and allow on-demand reporting. Arm assignment will not be exported to the  
862 intervention database, although its value is implicitly known. As such, intervention staff (in both  
863 the control and treatment conditions) will know which dyads have been assigned to which arm,  
864 but this knowledge is unavoidable and redundant with knowledge that will be apparent from  
865 contact with the dyads within each arm.

866

867 Randomization Data Safety

868 All databases (recruitment, measurement, etc.), will be stored within a password protected  
869 shared drive within the university computer system. All study staff will have access to the  
870 databases upon submitting the required password. Access to tables within these databases will  
871 be made available as needed to perform job responsibilities and in accordance with COPTR  
872 policies. The randomization schedule will not be stored in the intervention database making it  
873 impossible to access in this manner.

874

875 ***Risk/Benefit Analysis***

876 There are minimal research related risks associated with this study. For this study, suggested  
877 exercises will be mild and are unlikely to cause injury. All suggested dietary changes are  
878 evidence-based and healthy. If any physical injury or illness should occur as a direct result of  
879 participation in this study, VUMC maintains limited research insurance coverage for the usual  
880 and customary medical fees for reasonable and necessary treatment of such injuries or  
881 illnesses. The informed consent document will include this statement and will provide pertinent  
882 contact information.

883 The risks to subjects of the study are reasonable, given their minimal nature (e.g., suggested  
884 low-moderate physical activity options and healthy dietary changes; learning how to engage  
885 their children in dialogue) and given the safeguards employed, as described above. In contrast,  
886 we expect tangible benefits to accrue to all subjects of the study: intervention group participants  
887 are expected to experience improved healthy lifestyle habits and health outcomes as a result of  
888 participating in the study; control group parents are expected to experience empowerment in  
889 their ability to prepare their child for school and control group children are expected to be better  
890 prepared for school as a result of participating in the study. Also all participants are expected to  
891 experience increased parent-child bonding as a result of participating in the study. All  
892 participants in the will receive family memberships to their respective community recreational



893 center, depending on which treatment group will be during or after study implementation, which  
894 allow adults to use the weight room for no cost, and families to take swimming lessons at 50%  
895 of the normal cost.  
896

## 897 **Data and Safety Monitoring Plan**

### 898 899 General Description

900 Comprehensive measures will be implemented to maintain subject confidentiality as  
901 appropriate. Study ID number will identify all data collection materials for the study. Only study  
902 team members will have access to master linkup lists that match participant names to these  
903 Study ID numbers. The master link-up list linking names and Study ID numbers will also contain  
904 some basic demographics to be collected for purposes of the study (e.g., gender, maternal  
905 education) and personal health information (weight, height, body composition). All data  
906 collection forms will be housed at VUMC.  
907

908 All study data will be kept at VUMC securely locked in a storage area for this study. All data will  
909 be obtained specifically for research purposes. The study investigators reviewing the data will  
910 not be provided with any participant identification information. Study data collection forms will be  
911 maintained under lock and key for 10 years following completion of the study. Thereafter, they  
912 will be destroyed. All electronic data files will be stored on a password protected, secure,  
913 encrypted server. Only key study personnel will have access to the password. Ten years after  
914 study completion, electronic copies of all datasets will be destroyed. Individuals will not be  
915 identified in any publications of the study findings.  
916

### 917 Data Safety and Monitoring Plan

918 **Purpose:** The Data and Safety Monitoring Plan is written to ensure the safety of the participants  
919 and to verify the validity and integrity of the data.

920 **Assessment:** Participants will be assessed for adverse events at the time of enrollment and  
921 when the data is collected at each time-point. The Principal Investigator, co-investigators, study  
922 coordinator, intervention lists and all members of the research staff are responsible for the  
923 assessment and reporting of adverse events. All spontaneous reports by subjects, observations  
924 by clinical research staff, and reports to research staff by family or health care providers will be  
925 investigated. The investigators will assess the relationship of the adverse event as not related,  
926 possibly related or definitely related using standard criteria for clinical trials.

927 **Possible** (to qualify, the adverse event must meet 2 of the following conditions):

- 928 1) has a reasonable temporal relationship to the intervention,
- 929 2) could not readily have been produced by the subject's clinical state,
- 930 3) could not readily have been due to environmental or other interventions,
- 931 4) follows a known pattern of response to intervention,
- 932 5) disappears or decreases with reduction in cessation of intervention.

933  
934 **Probable** (to qualify, the adverse event must meet 3 of the following conditions):

- 935 1) has a reasonable temporal relationship to the intervention,
- 936 2) could not readily have been produced by the subject's clinical state,
- 937 3) could not readily have been due to environmental or other interventions,
- 938 4) follows a known pattern of response to intervention,
- 939 5) disappears or decreases with reduction in cessation of intervention.

- 940  
941 **Definite** (to qualify, the adverse event must meet at least 4 of the following conditions):  
942 1) has a reasonable temporal relationship to the intervention,  
943 2) could not readily have been produced by the subject's clinical state,  
944 3) could not readily have been due to environmental or other interventions,  
945 4) follows a known pattern of response to intervention,  
946 5) disappears or decreases with reduction in cessation of intervention.  
947

948 **Policy for Blinding in COPTR**  
949 **January 26, 2012**

950  
951 **Introduction**

952 In all clinical trials, the potential for bias is one of the main concerns. Bias arises from conscious  
953 or subconscious factors, and can occur from the initial design through study conduct, data  
954 management, data analysis and interpretation. A general approach to avoid biases is to keep  
955 the participants and the investigators blinded to the identity of the assigned arms until all data  
956 points are collected. As stated by Friedman, Furberg and DeMets, a fundamental point is that:  
957 *"A clinical trial should, ideally, have a double-blind design in order to avoid potential problems of*  
958 *bias during data collection and assessment. In studies where such a design is impossible, other*  
959 *measures to reduce potential bias are advocated."*

960 **Guiding principle #1:** All COPTR personnel that are in a position to change the study protocol  
961 or its implementation in study participants, should be blinded to information that may allow them  
962 to do so, from when the study starts until the study ends, with specific exceptions as delineated  
963 in this document.

964 Clarification of terms:

- 965
- 966 • The "study starts" at a site when the first participant is randomized.
  - 967 • The "study ends" at a site when the outcomes (primary and secondary) of importance to  
968 the site have been collected on all participants.
  - 969 • "Interim" information is information that is collected between the study start and the study  
970 end at a given site.

971 As stated in the "Decision Making Protocol," there are Common and Site-specific elements:

- 972
- 973 • **Common elements** refer to those measures that two or more sites collect, protocols  
974 and manual of procedures related to those measures, and reporting processes.
  - 975 • **Site-specific elements** refer to those measures and operational activities that relate to  
976 only one site.

977 With respect to study information/data, the following is to clarify terms:

- 978
- 979 • Study data – any information collected on study participants, which includes
    - 980 ○ Primary and secondary outcome variables
    - 981 ○ Demographic variables
    - 982 ○ Mediators and moderators
  - 983 • Outcome variables – primary and secondary outcomes as described in site protocols
  - 984 • Process variables – e.g. training, recruitment, intervention implementation, fidelity,  
985 adherence, retention/attrition



986 Also, data are available at multiple levels:

- 987 • Individual subject level, including subject's family or community
- 988 • Aggregated by arm, that is, collapsed from individual subject level and combined or
- 989 averaged by study arm

990

991 **Guiding principle #2:** All COPTR study site personnel (staff and investigators) should be  
992 blinded to study data aggregated by study arm that have the potential to impact the study's  
993 outcome, or if not possible, measures need to be taken to reduce potential bias. Specific  
994 exceptions are delineated in this document.

995 Study data 'that have the potential to impact the study's outcome include aggregated: arm-level  
996 outcome variables, mediators, moderators (OMM), and process variables. Individual level  
997 outcome variables, mediators, moderators, process, and demographic variables are not blinded.  
998 Arm-level demographic variables are not blinded.

999 There may be specific process data collected in one or more arms that the Principal Investigator  
1000 and study staff want to review aggregated by arm before the end of the study. Those variables  
1001 will be declared *a priori* by each site, reviewed by the Design and Analysis Working Group, and  
1002 approved by the PI. Those variables will be clearly listed as unblinded variables in the final  
1003 study protocol. Should sites wish to examine additional blinded process variables aggregated  
1004 by arm, after the study has begun, those requests would also be reviewed by the Design and  
1005 Analysis Working group and, if access is approved by the PI and by the DSMB, those variables  
1006 will be clearly listed as unblinded variables in an amendment to the study protocol. Subsequent  
1007 references in this document to process data will distinguish between blinded and unblinded  
1008 process variables.

1009 In clinical trials that require **interim** monitoring, it is an accepted principle that interim OMM and  
1010 blinded process data aggregated by arm should be kept confidential, with such data accessible  
1011 only to a small number of individuals responsible for its analysis and monitoring. Generally,  
1012 blinding to intervention arms should be maintained to the extent possible until the study ends.  
1013 In COPTR, study investigators and sponsors are not privy to interim OMM and blinded process  
1014 data aggregated by arm, and only the study or independent statisticians/analysts preparing and  
1015 presenting the analysis to the DSMB, as well as the DSMB, are unblinded.

1016 The study arms in the 4 trials are, BY DESIGN, not able to be totally blinded. However, some  
1017 blinding can be maintained. Measurement staff should not be informed of the intervention that  
1018 individual participants are receiving, and should have **no role** in the delivery of the intervention.  
1019 Efforts should be made to avoid participant (child/parents) interactions that result in open  
1020 chatting with assessors about the interventions they have received. Measurement staff should  
1021 be trained to end any such communication when initiated by participants.

1022 Study investigators and staff are kept blinded as to the ARM level results until study end. That  
1023 is, they should **never** see or hear OMM and blinded process data aggregated by arms until the  
1024 DSMB allows it. Exceptions to this policy are made only for individuals and circumstances in  
1025 which unblinding is necessary for the preparation of reports to the DSMB. Ancillary studies  
1026 need to adhere to these same principles.

1027 **Table 7. Summary of issues related to maintaining objectivity as applied**  
1028 **to COPTR**

|                                                                                                                                                              |                      |
|--------------------------------------------------------------------------------------------------------------------------------------------------------------|----------------------|
|                                                                                                                                                              | <b>COPTR</b>         |
| Interventions are comparable and suitable for blinding                                                                                                       | <b>NO, BY DESIGN</b> |
| Investigators/staff are blinded as to arm of an <b>individual</b> participant                                                                                | <b>NOT POSSIBLE</b>  |
| <b>Individual</b> child and/or parent participants are blinded as to the intervention they are receiving                                                     | <b>NOT POSSIBLE</b>  |
| Outcome assessors are blinded as to the intervention the <b>individual</b> participant is receiving                                                          | <b>YES</b>           |
| Site investigators and all study staff, except site statisticians/analysts, are blinded as to ALL the aggregated by arm interim OMM and blinded process data | <b>YES</b>           |
| Site Statisticians/analysts at each field site are blinded as to the aggregated by arm interim OMM data on <b>common</b> measures                            | <b>YES</b>           |
| Site Statisticians/analysts at each field site are blinded as to the aggregated by arm interim OMM on <b>site-specific</b> measures                          | <b>NO</b>            |
| Site staff are unblinded to the aggregated by arm process measures identified <i>a priori</i> or by amendment to the protocol as unblinded                   | <b>YES</b>           |

1029

1030 **Guiding principle #3:** In COPTR, the RCU will function as the ‘Independent Statistician,’ while  
1031 the individual study center statisticians/analysts will function as the ‘Site Statistician.’

1032 The rationale for keeping investigators and sponsors blinded to interim data is generally  
1033 accepted. The possible conflict of interest that could arise for the site statistician or analyst who  
1034 performs the analysis of the interim data and presents it to a data monitoring committee has  
1035 received little attention. Ellenberg and George (2004) describe some potential conflicts for the  
1036 Site Statistician, and approaches that might be taken to minimize them.

1037 Ellenberg & George (2004) argue that a reason for not blinding the Site Statistician is the  
1038 assumption that the Site Statistician is someone “with no obvious intellectual conflicts of interest  
1039 who, by training and temperament, can be trusted to provide a dispassionate analysis of the  
1040 accumulating data.” This objectivity assumption may or may not be true, and there are many  
1041 pressures exerted on the Site Statistician that is employed and part of the team at a study site.

1042

1043 Each of the 4 COPTR sites has identified an individual(s) who will serve as the Site Statistician.  
1044 The **Site Statistician is the person(s) responsible and accountable** for maintaining the blind  
1045 of any site-specific study OMM and blinded process data from all other site study investigators  
1046 and staff. It is the responsibility of the site Principal Investigator to ensure that the Site

1047 Statistician understands his/her role and responsibilities. The Site Statistician must have no  
1048 communication with others at the site, formally or informally, about trends in OMM and blinded  
1049 process data and side effects. They must also safeguard data files, printed output, log files and  
1050 any emails or correspondence related to the OMM and blinded process data and side effects  
1051 with the RCU and the DSMB. It is their responsibility to take care in destroying printouts and  
1052 correspondence – ideally by shredding. It is also their responsibility to make sure that any  
1053 discussion and communications of blinded data with the RCU and DSMB are confidential.

1054 The Site Statistician:

- 1055 i. will be blinded to aggregate comparisons by arm of post-randomization COMMON  
1056 OMM data until all endpoint data have been collected at their site unless otherwise  
1057 instructed by the DSMB.
- 1058 ii. will remain objective when carrying out the activities of conducting the trials –  
1059 preparing randomization schemes, randomizing individual subjects, processing of the  
1060 data, cleaning and editing the data, preparation of analyses/reports of site-specific  
1061 OMM and blinded process data, and transmitting the COMMON OMM data to the  
1062 RCU; and
- 1063 iii. is responsible and accountable for maintaining the blind of study site investigators  
1064 and staff at their site with respect to OMM and blinded process data aggregated by  
1065 arm.  
1066

1067 The RCU:

- 1068 i. is the only entity that has personnel that are unblinded to the COMMON OMM data  
1069 aggregated by arm during the trial;
- 1070 ii. will prepare analyses/reports to the DSMB of the COMMON OMM data and adverse  
1071 events aggregated by arm, as requested by the DSMB;
- 1072 iii. shares responsibility for maintaining the blind of study site investigators and staff;  
1073 and
- 1074 iv. is responsible and accountable for maintaining the blind of co-investigators from NIH  
1075 and RCU staff who do not need to be unblinded with respect to COMMON OMM  
1076 data aggregated by arm in order to complete their duties.  
1077

## 1078 **Responsibilities of the Site Statistician and the RCU**

1079 It is imperative that professional ethical conduct guidelines be followed by the Site Statistician  
1080 and the RCU Independent Statisticians at each stage of the study. The Site Statistician  
1081 prepares the randomization scheme and thus handles the list (datafile, database table, etc.)  
1082 linking study ID to assignment that permits looking at the data aggregated by arm. Thus, this  
1083 person(s) must exercise care in protecting the treatment allocation list and ensuring no one –  
1084 including him/herself - conducts any analyses of COMMON OMM variables, adverse event or  
1085 other follow-up information aggregated by arm. The Site Statistician may prepare descriptive  
1086 reports of site-specific data aggregated by study arm if so directed by the DSMB or RCU. All  
1087 study data must be protected in secure, password protected files or databases with only the Site  
1088 Statistician, their programming staff, and the RCU having access to the data files. Note that  
1089 data needed to interact with and track families (e.g., names, ages, contact info, etc), will not be  
1090 blinded to interventionists, of course.

1091 The list (datafile, database table, etc.) created by the Site Statistician that contains the subject  
1092 ID and the allocation to study arm is protected in a secure and password protected manner with  
1093 only the Site Statistician and the RCU having access to the information.

#### 1094 **Blinding of Investigators by Data Type**

1095 All data collected will be categorized *a priori* into one of 7 categories:

- 1096 i. *Demographic* information, such as age, sex, country of origin, and contact  
1097 information is not blinded, either at the individual level or aggregated by arm.
- 1098 ii. *Study arm assignment* is concealed until the time of randomization.
- 1099 iii. Post-randomization, all field center or site personnel are blinded to *common OMM*  
1100 *data, aggregated by arm*, except as allowed by the DSMB.
- 1101 iv. Post-randomization, all site personnel except the site statisticians/analyst are blinded  
1102 to site-specific OMM data, aggregated by arm. The site-specific OMM data,  
1103 aggregated by arm, are held strictly confidential by the Site Statistician, programmers  
1104 they designate, and the RCU as detailed in this document.
- 1105 v. *Post-randomization, individual level process data* are viewed by the Principal  
1106 Investigators throughout the study and may also be shared with the interventionists,  
1107 Project Coordinator or Manager. *Arm-level process data* may be viewed by the  
1108 Principal Investigators and shared with the interventionists, Project Coordinator or  
1109 Manager, if those variables are first reviewed by the Design and Analysis Working  
1110 Group, approved for access by the PI, and listed *a priori* as unblinded variables in  
1111 the study protocol or as an amendment to the study protocol.
- 1112 vi. Post-randomization, blinded process data, aggregated by arm, are held strictly  
1113 confidential by the Site Statistician, programmers they designate, and the RCU as  
1114 detailed in this document.
- 1115 vii. *Safety data* are collected for the purpose of insuring participant safety. Guidelines  
1116 for viewing these data have been designed by the COPTR Subcommittee on  
1117 Recruitment, Retention, Consent, Adverse Events and Safety.
- 1118

#### 1119 **Blinding of Investigators to Study Data by Study Stage**

- 1120 i. **All baseline data** from an individual subject are collected prior to allocation to a study  
1121 arm. Following all baseline data collection on an individual subject, allocation  
1122 information on that subject is made available to site study staff as needed.  
1123 Comparative baseline (pre-randomization) data may be viewed by investigators and  
1124 study staff in aggregate by arm (e.g., for reporting comparability of groups in a  
1125 design and/or baseline manuscripts). The site investigators may analyze and publish  
1126 data collected at baseline using the usual policies of subject confidentiality and  
1127 protection and guidelines set by the COPTR Subcommittee on Publications,  
1128 Presentations and Ancillary Studies.
- 1129 ii. **Interim Data (post-randomization)**. All site personnel are blinded to *common OMM*  
1130 *data, aggregated by arm*, except as allowed by the DSMB. All site personnel except  
1131 the site statisticians/analyst are blinded to site-specific OMM data, aggregated by  
1132 arm. The site-specific OMM data, aggregated by arm, are held strictly confidential by  
1133 the Site Statistician, programmers they designate, and the RCU as detailed in this  
1134 document. *Individual level process data* are viewed by the Principal Investigators  
1135 throughout the study and may also be shared with the interventionists, Project  
1136 Coordinator or Manager. *Arm-level process data* may be viewed by the Principal  
1137 Investigators and shared with the interventionists, Project Coordinator or Manager, if

1138 those variables are first reviewed by the Design and Analysis Working Group,  
1139 approved for access by the PI, and listed *a priori* as unblinded variables in the study  
1140 protocol or as an amendment to the study protocol. Blinded process data,  
1141 aggregated by arm, are held strictly confidential by the Site Statistician, programmers  
1142 they designate, and the RCU as detailed in this document. **No interim OMM or  
1143 blinded process data from any arm are available for publication or  
1144 presentation until the end of the study, unless the plan has been (1) reviewed  
1145 by the Design and Analysis Working Group and the Publications  
1146 Subcommittee and (2) approved by the site PI, the Steering Committee, and the  
1147 DSMB.**

1148 iii. *Final data.* *Final data* are held private at each site or at the RCU in the same  
1149 manner as the Interim data until the end of the study. The end of the study at each  
1150 site is defined as the moment that the last study data point at that site has been  
1151 collected and recorded. This includes data from all study index children as well as  
1152 data from other individuals and entities at a study site. At the end of the study, all  
1153 study data, including data on study arm assignment, can be accessed by study  
1154 investigators using the usual policies of subject confidentiality and protection and  
1155 guidelines set by the COPTR Subcommittee on Publications, Presentations and  
1156 Ancillary Studies.  
1157

#### 1158 **Preparation of Study Data Reports for the DSMB**

- 1159 i. Accumulated data will be ‘frozen’ at a specified date for the particular report. A copy  
1160 of the ‘frozen raw datafile of COMMON measures’ is sent to the RCU for analysis  
1161 along with the protected list of the treatment allocation.
- 1162 ii. After processing, cleaning, editing, creating derived variables, the dated ‘analysis  
1163 files’ of COMMON variables (including treatment allocation) and relevant  
1164 documentation are sent to the RCU. Site-specific data are not sent to the RCU.
- 1165 iii. For COMMON variables, the Site Statistician conducts analyses for the purposes of  
1166 data cleaning and looking for outliers, unusual trends and distributional anomalies of  
1167 the data from their own site, overall – **not** by study arm. They do not generate  
1168 comparative analyses by study arm. Information generated (not the raw data) may  
1169 be shared with other site investigator/s for the purposes of conducting data cleaning.  
1170 The cleaned COMMON variables data are sent to the RCU, along with means and  
1171 frequencies for all variables. The RCU will prepare means and frequencies for all  
1172 variables and compare them to the site results to confirm accurate transfer of data.  
1173 The RCU will prepare descriptive and quality control tables for presentation to the  
1174 DSMB, both overall and by study arm. No modeling is done by the RCU unless they  
1175 are specifically instructed to do so by the DSMB.
- 1176 iv. For **site-specific** data, the Site Statistician conducts analyses for the purposes of  
1177 data cleaning and looking for outliers, unusual trends and distributional anomalies  
1178 from their own site, in a manner similar to that described above for COMMON  
1179 variables. Different from common variables, the Site Statistician prepares descriptive  
1180 and qualitative data reports using templates developed in cooperation with the RCU.  
1181 These reports will not be generated by study arm unless instructed to do so by the  
1182 DSMB. Otherwise, site-specific variables will be examined only with data from all  
1183 study arms combined.  
1184

#### 1185 **Data on Participant Safety**



1186 As with other data, safety data will be blinded, as possible, to the investigators and staff at each  
 1187 site (not possible when obviously related to the intervention or collected during an intervention  
 1188 activity, for example). The objectively collected adverse events data, however, are collected the  
 1189 same way in all arms and will be blinded. Sites should see only aggregate data (all treatment  
 1190 arms combined) although RCU can prepare data for DSMB by arms.

1191 **Treatment condition unblinding recommendations**

1192 Study arms

1193 Decisions to unblind the site investigators to arm-level experimental assignment will be the  
 1194 responsibility of the DSMB according to the following steps.

- 1195 i. RCU prepares adverse events and safety reports by unidentified arm (e.g., group A,  
 1196 group B) in the twice-yearly DSMB reports.
- 1197 ii. DSMB reviews adverse events and other safety-relevant data at their periodic  
 1198 meetings.
- 1199 iii. If the DSMB identifies a potentially important difference between arms in adverse  
 1200 events or other safety-related data, they may request additional analyses and/or  
 1201 request unblinding of arm assignment (e.g, treatment and control), and may consult  
 1202 with the NIH, RCU and PI(s) to help them interpret the findings. Unblinding, if  
 1203 necessary, should be limited to only those investigators who need to know to protect  
 1204 the safety of participants.
- 1205 iv. If the DSMB determines that the differential between arms may impact the safety of  
 1206 participants and/or changes the assessment of risk of participation, they will make  
 1207 the appropriate recommendation to the NIH who, in turn, will notify the site PIs,  
 1208 accordingly.
- 1209 v. It is the responsibility of the site PIs to report to their site IRBs.

1211 **Presentation of Reports to the DSMB**

1212 The RCU statisticians will be presenting the report, which includes the report on the common  
 1213 measures, plus each site’s site-specific variables report. The Site Statisticians are available to  
 1214 be contacted by phone during the DSMB meeting in case questions arise that they are in a  
 1215 better position to answer about the site-specific variables and the overall site analyses. Site  
 1216 Statisticians may not participate in any portion of the meeting or call in which unblinded common  
 1217 OMM data are discussed.

1218 **Timeline for preparation of reports to the DSMB**

1219 Typically there is a roughly a 7-week period prior to the date of the meeting for preparing the  
 1220 DSMB report. Adherence to this timeline assumes that data entry and cleaning have been  
 1221 ongoing and that templates used to generate tables have already been created. It also  
 1222 recognizes that some data, such as blood analyses, actigraph, and diet data, that undergo other  
 1223 processing, may be delayed in comparison to other types of data.

1224 **Table 8. Timeline for preparation of reports to the DSMB**

|          |                                                                                                                                                                                                     |
|----------|-----------------------------------------------------------------------------------------------------------------------------------------------------------------------------------------------------|
| -7 weeks | <ul style="list-style-type: none"> <li>• data ‘frozen’ for the report on same date at each field site</li> <li>• copy of raw frozen COMMON measures files sent to RCU</li> </ul>                    |
| -5 weeks | <ul style="list-style-type: none"> <li>• data processing, data cleaning, data editing, datafile creation at each field site completed</li> <li>• clean COMMON measures files sent to RCU</li> </ul> |

|          |                                                                                                                                                                                                                                           |
|----------|-------------------------------------------------------------------------------------------------------------------------------------------------------------------------------------------------------------------------------------------|
| -3 weeks | <ul style="list-style-type: none"> <li>• data reports on site-specific variables prepared, reviewed at each field site and sent to RCU</li> <li>• data reports on COMMON variables prepared and reviewed internally at the RCU</li> </ul> |
| -2 weeks | <ul style="list-style-type: none"> <li>• RCU compiles reports, assembles binders and sends to DSMB</li> </ul>                                                                                                                             |
| 0 weeks  | <ul style="list-style-type: none"> <li>• DSMB meeting</li> </ul>                                                                                                                                                                          |

1225

1226 At the meeting, the RCU presents the report, and afterwards collects all reports for archival. The  
 1227 RCU communicates with site investigators and Site Statisticians on relevant issues raised by  
 1228 the DSMB – such communication is not shared with other site staff or investigators.

1229 **Communication of the Policy for Blinding in COPTR**

1230 In order to insure that this policy is clearly understood and communicated, all COPTR study  
 1231 Principal Investigators, the NIH Project officer, the Site Statistician and the RCU members  
 1232 involved in data management or analysis will confirm compliance. Over the course of the study  
 1233 as new personnel are hired, they will also confirm compliance. This will be done by each of  
 1234 these individuals sending an email to the COPTR Communications Manager as follows:

1235 I have read, understood and agree to comply with the 9 page document entitled,  
 1236 *Policy for Blinding in COPTR.*

1237 The RCU will maintain a list of the names of individuals from whom this confirmation has been  
 1238 received, and this list will be available for inspection by the DSMB.

1239

1240 **References**

- 1241 1. Ellenberg SS, George SL (2004) Should statisticians reporting to data monitoring  
 1242 committees be independent of the trial sponsor and leadership? *Statistics in Medicine*  
 1243 23:1503–1505.  
 1244 2. Friedman LM, Furberg CD, DeMets DL (2010) Fundamentals of Clinical Trials, 4<sup>th</sup> ed.,  
 1245 Springer, NY.  
 1246

1247

1248

1249 ***Study Design, Statistical Consideration and Analysis Plan***

1250

1251 **Study Design**

1252 The design of the study is a longitudinal non-blinded (open) randomized control trial, comparing  
 1253 participants in an obesity prevention treatment program to those in a non-specific literacy-based  
 1254 educational control group. The trial will take place over six years. The trial will be conducted at  
 1255 two separate sites (region One, East Nashville, and region Two, South Nashville). Within each  
 1256 site, parent-child dyads with children ages 3-5 years will be randomly assigned, stratified  
 1257 according to parent language use (English or Spanish), to either the three-year prevention  
 1258 program or the control condition, yielding 600 dyads per cohort (300 per region/site), and a total

1259 sample size of 600. Assessments will occur over six time points within each cohort, beginning at  
1260 baseline and including assessments post-intervention (at 12 weeks/3 months), and at 9, 12, and  
1261 36 months from baseline.

1262

### 1263 **Primary Research Question and Hypothesis**

1264 Our primary research question is about the impact of the GROW trial on the growth rate of  
1265 children’s BMI over time. Specifically, we hypothesize the following:

1266

1267 Hypothesis 1: The BMI trajectories of children in the treatment group will accelerate at a slower  
1268 rate than those in the control group over time.

1269

### 1270 **Primary Outcome**

1271 Although childhood obesity is a well-documented public health concern, most studies have  
1272 assessed the obesity outcome (e.g., BMI) using only a single time point or incorporating a pre-  
1273 post design, leaving us with little knowledge about the actual shape or growth rate of trajectories  
1274 of BMI during this critical period of development. Indeed, few studies have taken a  
1275 developmental perspective in order to understand how and when obesity develops in early  
1276 childhood. By measuring BMI at multiple time points, we will examine growth trajectories in early  
1277 childhood. This will allow us to examine the effect of a prevention program on these varying  
1278 trajectories (Agras, Hammer et al. 2004; Pryor, Tremblay et al. 2011). As Barker et al.  
1279 demonstrated, it is the change in BMI over time in early childhood, rather than BMI at any one  
1280 time point, that is linked with health consequences in adulthood (Barker, Osmond et al. 2005).  
1281 Moreover, an earlier childhood adiposity rebound is associated with an increased risk of later  
1282 obesity (Rolland-Cachera, Deheeger et al. 1984; Cole 2004). Because clinical literature about  
1283 childhood obesity indicates that the shape of the BMI trajectory across ages three to eight is  
1284 curvilinear, we will account for this in our analytic plan (Kuczmarski, Ogden et al. 2002; Cole  
1285 2004) (see below).

1286

### 1287 **Primary Analysis**

#### 1288 **Statistical model and approach**

1289 For our primary analysis, which will be an intention-to-treat analysis, we will fit the following  
1290 quadratic mixed model equation (some subscripts suppressed for readability):

1291

$$1292 \text{ BMI} = \beta_0 C + \beta_1 I + \beta_2 (\text{age}-X) C + \beta_3 (\text{age}-X)^2 C + \beta_4 (\text{age}-X) I + \beta_5 (\text{age}-X)^2 I + \dots + \text{error terms}$$

1293

1294 where:

- 1295 1. “I” is an indicator for group and equals 1 for the intervention group and 0 for the control  
1296 group; “C” is an indicator for group and equals 1 for the control group and 0 for the  
1297 intervention group; there is no intercept in this model in the ‘traditional sense’ (see point  
1298 two below);



- 1299 2. “X” is the value at which we center age; we plan to use age at enrollment as our  
1300 centering term, which will make the indicator variables interpretable ( $\beta_0$  as the mean BMI  
1301 at enrollment for those in the control group and  $\beta_1$  as the mean BMI at enrollment for the  
1302 intervention group);
- 1303 3. “...” stands for other predictors; at the present time, we believe that the predictors for the  
1304 main model will be gender (coded, e.g., as 1 for female and 0 for male) and ethnicity (we  
1305 expect there to be three ethnicity groups and thus two indicator variables for these); in  
1306 addition, gender by age interaction terms will be included, since the literature indicates  
1307 that trajectories may differ by gender;
- 1308 4. For the primary analysis, “error terms” will include subject, subject X age, and the  
1309 covariance between these random effects, using a heterogeneous variance structure for  
1310 the fitted model (Roberts & Roberts, 2005). For the primary analysis, we will not include  
1311 a random effect for subject X age<sup>2</sup>, given that, with our proposed unstructured  
1312 covariance matrix, the inclusion of this additional random effect would result in 13  
1313 random-effects components and may lead to convergence problems (see Rabe-Hesketh  
1314 & Skrondal, 2012, page 348). We will examine the consequences of this choice via  
1315 planned secondary analyses (see below, section 11.8)
- 1316 5. A post-hoc test of whether will allow us to examine whether the quadratic terms differ  
1317 between arms of the trial, thus answering our primary research question.

1318

1319 Interpretation of some terms: the indicator variable for trial arm, the linear term (age) for trial  
1320 arm, and the quadratic term (age)<sup>2</sup> for trial arm jointly describe the trajectory (and starting point)  
1321 for each group (intervention and control), and each can be interpreted as follows: the constant is  
1322 the mean BMI at age on entry into the trial; the linear term indicates the rate of change at entry  
1323 age; and the quadratic term indicates change in rate of growth (acceleration). In our  
1324 specification, this model allows each child to have her/his own BMI intercept at baseline and  
1325 own BMI trajectory. Accordingly, we do not include BMI at baseline as a predictor in our model.  
1326 Additionally, we do not include a BMI by treatment interaction, because BMI is an outcome and  
1327 treatment is a predictor. We plan to examine a baseline BMI by treatment interaction (as well as  
1328 other interactions) in our secondary analysis (see below).

1329

1330 Our hypothesis is that  $\beta_5$ , the quadratic term for the intervention group, will be significantly  
1331 different from  $\beta_3$ , the quadratic term for the control group, at the 0.05 level. We do not have a  
1332 hypothesis about the linear terms. Note that we expect the sign of  $\beta_5$  to be positive, and we  
1333 expect the coefficient to be smaller than the coefficient for  $\beta_3$ .

1334

1335 A graphical view of the above description is provided below in Figure 11.1 (we have suppressed  
1336 the lines for the individual age groups for readability); note that the actual model will produce  
1337 smooth curves instead of the piece-wise linear curves shown in the graph.

1338

1339 **Figure 11.1: Projected BMI trajectories over time**

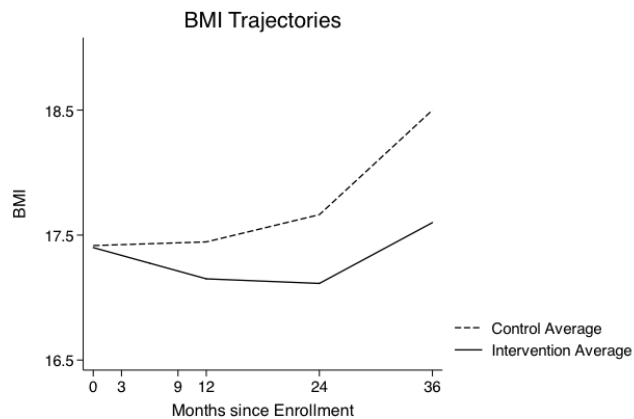

1340

1341

### 1342 **Assumptions with Justification**

1343 *Assumptions Pertaining to Potential ICC among BMI Trajectories:* We will have three waves of  
1344 recruitment with 200 parent-child dyads/wave (100 dyads/arm). The control group will gather in  
1345 unchanging groups in local libraries, where we expect little-to-no correlation even though  
1346 children will stay in their original session for the entirety of the study. The intervention group  
1347 utilizes a social network building component and will have pre-specified parent groups that will  
1348 continue throughout the study. The intervention group will attend one of two community  
1349 recreation centers (50 dyads/community recreation center/wave). Typically, we will divide these  
1350 dyads evenly across three weekly sessions. The session is our subgroup (cluster) of interest.  
1351 Each session will have approximately 17 families in it. If the size of the subgroup remains  
1352 constant over time, the total number of subgroups we will have is 36, i.e.,  $600/(50/3)$ .

1353

1354 It is also worth noting that we will further subdivide the 17 families of an intervention session into  
1355 two smaller subgroups of 8-9 families. This division is done to facilitate our activities and  
1356 encourage interaction among these smaller subgroups. It will also likely facilitate the  
1357 development of social networks among these groups, which we hypothesize to be related to  
1358 improved health outcomes for the treatment group over the course of our intervention. If we take  
1359 this smaller subgroup as the unit for the intervention group, our total number of subgroups is 54,  
1360 i.e.,  $18+36$ , or  $[300/(50/3)]+[300/(50/6)]$ , where the first square bracket is the number of  
1361 subgroups in the control group (where subgroups are not broken down into smaller subgroups),  
1362 and the second square bracket is the number of subgroups in the intervention group.

1363

1364 The social networking aspect within the intervention group and the smaller group size lead us to  
1365 predict a positive but small ICC that may be higher than what we expect to be a small ICC in the  
1366 control group. Note, however, that session membership is well-defined for both the intervention  
1367 arm and control arm, as participants will have minimal movement between sessions. This leads  
1368 us to propose a heterogeneous variance structure for the primary analysis, allowing the ICC at  
1369 the level of session to be estimated separately for the intervention and control arms.

1370

1371 Checking and Sensitivity Analyses: Once a model has been estimated, we will need to  
1372 investigate its properties not only to ensure that any data idiosyncrasies do not impact the  
1373 results but also to help ensure that the results are generalizable. The first issue is to check for  
1374 systematic differences between the model and the data using graphs, such as comparisons of  
1375 predicted and observed values of BMI, and other standard diagnostics (Snijders 2008). An  
1376 extension of this idea is to simulate new sets of outcomes, based on our model, and use the  
1377 simulated data as a reference test group by comparing this set to the observed result; in this  
1378 case, we would look for situations in which the data appear different from what we would expect  
1379 by using the model to predict the data (Gelman 2007).

1380

1381 A second issue is whether we have left out important features of the model, including, for  
1382 example, (1) age at randomization, (2) measurement occasion, (3) study wave (by which we  
1383 mean enrolled in first year, second year, or third year of the program), or (4) other demographic  
1384 variables (e.g., SES, parent level of education) or substantive covariates (e.g., maternal  
1385 depression). Some of these variables will be tested explicitly as moderators or mediators (see  
1386 previous sections pertaining to moderators and mediators as well as sections 11.6 and 11.7  
1387 below). In addition, trajectories may vary by baseline BMI; this possibility will be checked by  
1388 estimating a model with a baseline BMI by treatment group interaction. We will estimate  
1389 additional models that include one or more of these additional features to check whether  
1390 inclusion of any of these predictors is both statistically reasonable and affects our conclusions.

1391

1392 A third issue is whether age is correctly specified. With six data points, a limit exists as to what  
1393 can reasonably be done. We suggest that the quadratic model should be checked in two ways:  
1394 (1) substitute linear splines with a break between, for example, ages 4 and 5 (anticipated  
1395 adiposity rebound timing); (2) substitute non-linear splines, in particular, restricted cubic splines  
1396 with 4 knots chosen following Harrell's default positions (Harrell 2001).

1397

1398 A fourth issue relates to the potential correlation among the clusters/subgroups in our analysis:  
1399 to what extent are these clusters correlated, what is the effect of that correlation on our results,  
1400 and how accurately have we specified the clusters? Although we will not use the cluster-  
1401 adjusted robust sandwich estimator in our primary analysis, we will, as a safeguard, fit a model  
1402 that assumes a cluster structure within the data and compare the standard errors of this model  
1403 to those from our primary model. If there are substantive changes in the standard errors, further  
1404 work will be done to see which set of standard errors is more appropriate in our situation.

1405

#### 1406 **Missing data including level of attrition, lost to follow-up, and missing data treatment**

1407 Estimated Attrition: Within each planned cohort of 200 dyads per three cohorts, six waves of  
1408 data collection will occur, with shorter time intervals between the earlier waves and longer time  
1409 intervals later. According to prior community-based studies, subject dropout decelerates over  
1410 time, with the worst losses occurring early. We will make every effort to reduce attrition, with  
1411 particular focus on the earlier waves of the study, to ensure that we retain at least 80% of our  
1412 sample within each cohort, yielding a cohort size of at least 160 and a total sample size, at  
1413 study end, of at least 480. This level of attrition would leave us sufficiently powered (.90) to be

1414 able to detect a standardized effect size of .40 (a respectable and common effect size unique to  
1415 the analytic method we are using--see sample size and power analysis section). An even larger  
1416 sample size will increase the power to detect a meaningful difference, as explicated in the  
1417 power analysis and sample size section below, and we will strive to ensure that the sample is as  
1418 large as possible at each successive wave. In addition, it is important to note that our analysis is  
1419 an intention-to-treat analysis. Accordingly, we will use all cases in our analyses, even those with  
1420 as few as one wave of data, such that attrited cases will not truly be lost but instead retained in  
1421 our analytic procedures.

1422

1423 Missing Data: Conceptually, we anticipate two types of missing data: (1) people who drop out  
1424 after a measurement occasion and never return [i.e., lost to follow up]; and (2) people who miss  
1425 one or more particular measurement occasions (e.g., occasion three) but are present for each  
1426 of the others, at least one of which is later in time than the one (or more) that they missed.

1427

1428 With six repeated measurements, some participants inevitably will miss one or more occasions  
1429 of outcome data collection. One advantage of the mixed models over older repeated measure  
1430 ANOVA models is the use of all available data without dropping any subjects (Nich and Carroll  
1431 1997). We begin by assuming that the missing occasions meet MCAR or MAR assumptions  
1432 (Little and Rubin 2002). If so, the results of the mixed model (e.g., the effect of time, group by  
1433 time) are robust.

1434

1435 To guard against missingness biasing results, we will also conduct secondary analyses of  
1436 missingness to see how realistic the assumption of MAR or MCAR may be. This check can be  
1437 done in several ways. We will start with descriptive statistics comparing the characteristics of  
1438 observations with and without missing values (e.g., gender, baseline BMI, age at enrollment,  
1439 etc.). The first analysis will use standard multiple-imputation with 100 imputations (Little and  
1440 Rubin 2002). Three possible directions, in addition to standard diagnostics (White, Royston et  
1441 al. 2011) can be pursued when checking whether being missing is non-random (i.e., in checking  
1442 the results of the multiple imputation):

1443

1444 1) The first method is our primary suggestion: we will impute the data using standard  
1445 multiple imputation (MI) software but with constraints on the values that can be imputed.  
1446 These constraints arise because our prime concern regarding non-random missingness  
1447 is that either those who don't need the program (i.e., those who are lean) or those who  
1448 perceive that they are not seeing an effect (i.e., who are, and remain, overweight) will  
1449 miss occasions. For example, in one set of imputations we would constrain all imputed  
1450 BMIs to be below, say, "a"; in a different set, we would constrain the imputed BMIs to be  
1451 above, say, "b"; this type of constrained MI is discussed in An and Little(An, Little et al.  
1452 2010) and Jenkins, Burkhauser, Feng, and Larrimore(Jenkins, Burkhauser et al. 2011).  
1453 One hundred imputations will be used for each such constrained MI. We will examine  
1454 the BMI pattern of those who drop out and, if we see evidence of either "a" or "b", use  
1455 the values we observe to set the constraints.

1456 2) A second possible type of sensitivity analysis was originally suggested by Rubin (1987)  
1457 and has been extended by Carpenter, Kenward, and White,(Carpenter, Kenward et al.

1458 2007) who suggest weighting each imputed result (rather than Rubin's standard simple  
1459 averaging of the results), where the weight depends on the assumed departure from the  
1460 MAR assumption. Their technique relies on at least one strong assumption, but they  
1461 provide a graphical diagnostic to help check this assumption.

1462 3) If drop-outs (situation one above) are much more common than missing an occasion and  
1463 then returning (situation two above), we will estimate a pattern-mixture model (Little  
1464 1993; Hedeker and Gibbons 1997). If missing one or more occasions and then returning  
1465 is relatively common, however, we will not pursue this strategy.

1466

### 1467 **Detectable Difference, Sample Size, and Power**

1468 Power and Sample Size Estimation: The power analysis was performed on our primary analysis  
1469 (see below): a quadratic model of the BMI trajectories. For our sample size estimation, we used  
1470 the OD (Spybrook 2011) software so that we would be consistent with our planned analysis.  
1471 This software allowed us to examine two-group repeated-measures trials with quadratic change,  
1472 the same model being used for the analysis.

1473

1474 This software uses a standardized effect size as defined in Raudenbush and Liu, namely, the  
1475 group difference on the polynomial trend divided by the "population standard deviation of the  
1476 polynomial trend of interest" (p. 391; the "population standard deviation" refers to the square  
1477 root of the variance of the random effect) (Raudenbush and Xiao-Feng 2001). This specification,  
1478 particularly the denominator, is quite different from cross-sectional standardized effect sizes  
1479 such as Cohen's D, given that, with a polynomial model (here quadratic), the difference between  
1480 groups depends on the point in time examined. In particular, given our hypothesis (see below),  
1481 we expect that, after adiposity rebound is reached, the BMI of children in the intervention group  
1482 will grow more slowly than that of children in the control group such that the differences between  
1483 their mean BMIs will increase over time. Our expectation implies that we are interested in the  
1484 significance of the quadratic term in the model, and expect that the difference between the  
1485 control and treatment group quadratic effect will be significantly different from zero.

1486

1487 We note one difference between the OD program's assumptions and our study: the OD program  
1488 assumes that the measurement occasions will be equally spaced over time, which is not the  
1489 case in our study. As a result, specifications from the OD program may lead us to overestimate  
1490 power and underestimate sample size. Power is high in the current study, as can be seen in the  
1491 table below, thus we expect that these potential mis-estimations are not problematic.

1492

1493 To determine the power and effect size of the current study, we need estimates of the  
1494 standardized effect size, which we obtained from a subset of our previous Salud Con La Familia  
1495 study. We used only a subset of the Salud subjects because the inclusion criteria for that study  
1496 (i.e., children at any level of baseline BMI) were broader than for the current study (i.e., children  
1497 whose baseline BMI is between the 50<sup>th</sup> and 95<sup>th</sup> ([or 99<sup>th</sup>] percentile). For our estimations, then,  
1498 we used only the Salud data for those from the 50<sup>th</sup> to the 95<sup>th</sup> percentile (and then again from  
1499 the 50<sup>th</sup> to the 99<sup>th</sup> percentile [see below]). Other important differences exist between Salud and  
1500 the current study, however, that limit our ability to estimate power and sample size based solely



1501 on Salud: (1) the Salud subjects had only three measurement occasions which covered 15  
 1502 months rather than six occasions over three years (the GROW trial) and (2) the Salud  
 1503 intervention was comparable only to the 12-week intensive phase proposed in the GROW study  
 1504 and did not include a maintenance or sustainability phase as proposed in the GROW trial. We  
 1505 expect that the increased number of sessions as well as the intensity of the intervention in the  
 1506 GROW trial will serve only to increase the power of the GROW study.

1507  
 1508 When using the OD software, the user can set various values, the most important of which is  
 1509 the standardized effect size discussed above. Other possible values to set include the duration  
 1510 of the study (here, three years), the number of measurement occasions (here six), and the  
 1511 variance of the residuals and the variance of the random effects. We found that even fairly  
 1512 sizable changes in value used for the residuals and the variance of the random effects had little  
 1513 effect on the projected sample size (e.g., holding other elements constant and changing the  
 1514 variance of the random effect of age-squared from the observed standard deviation of 2.8  
 1515 [based on the Salud data] to the OD program's default of 1, only increased the sample size at a  
 1516 power of 0.8 by about 20 subjects). Using the program defaults for residuals and variance of the  
 1517 random effects was a conservative (i.e., produced larger estimates of sample size) approach  
 1518 compared to using the results based on Salud, thus we used these defaults in the table below.  
 1519 Changing the standardized effect size does have important consequences for the estimated  
 1520 sample size, however (see Table 9).

1521  
 1522 As previously stated, we used the Salud data to estimate our primary model (see below) for  
 1523 those within that study who were between the 50<sup>th</sup> and 95<sup>th</sup> BMI percentiles at baseline. The  
 1524 control group in the Salud data showed unexpected results with virtually no non-linearity (i.e.,  
 1525 their BMI trajectories increased but in a linear fashion over a 15 month period), therefore we  
 1526 believe that the effect size from that model, which was quite large and based on different  
 1527 assumptions, is an overestimate of the effect that we will see in the GROW study. Instead we  
 1528 used the OD program default for the effect size of 0.4, a commonly used effect size in  
 1529 longitudinal studies and thus the OD program default, to estimate our required sample size.  
 1530 Accordingly, Table 9, below, indicates, for powers of 0.7, 0.8, and 0.9, the estimated sample  
 1531 size using the OD program for the default effect size (0.4) and for two additional effects sizes, a  
 1532 smaller and more conservative effect size (0.3) and a larger and more liberal effect size (0.5).  
 1533 As the table below indicates, we estimate that recruiting a sample size of at least 480 will leave  
 1534 us adequately powered to determine this middle/medium effect size of 0.4.

1535  
 1536 **Table 9: Estimated required sample size for given standardized effect sizes**

|                   | Sample size for<br>Standardized<br>Effect size = 0.3 | Sample size for<br>Standardized<br>Effect size = 0.4<br>( <i>OD program<br/>default</i> ) | Sample size for<br>Standardized<br>Effect size = 0.5 |
|-------------------|------------------------------------------------------|-------------------------------------------------------------------------------------------|------------------------------------------------------|
| Power/Effect Size |                                                      |                                                                                           |                                                      |



|        |     |     |     |
|--------|-----|-----|-----|
| 70.00% | 500 | 285 | 186 |
| 80.00% | 640 | 360 | 232 |
| 90.00% | 860 | 480 | 308 |

1537

1538 Because the results of our pilot study currently underway have led us to consider including  
 1539 children with higher baseline BMI in the GROW trial than we had originally planned, we also  
 1540 estimated our primary model on Salud participants who were between the 50<sup>th</sup> and 99<sup>th</sup>  
 1541 percentile of baseline BMI to determine the effects of including these children with a higher BMI.  
 1542 While, as expected, the variance increased when we moved to the model that added children  
 1543 between the 95<sup>th</sup> and 99<sup>th</sup> percentiles, the difference between groups (control and intervention)  
 1544 also increased such that the standardized effect size changed very little and, thus, there was  
 1545 virtually no effect on power (i.e., the desired sample size, under various conditions, never  
 1546 changed by more than two people). If, then, we decide to extend our criteria in the GROW trial  
 1547 to include children who are in the 95<sup>th</sup> to 99<sup>th</sup> percentile of BMI at baseline, our analyses will  
 1548 continue to be sufficiently powered.

1549

1550 Currently, the design for the GROW trial includes 600 children, and, though we would expect to  
 1551 be adequately powered at a smaller number of subjects, we plan to recruit 600 subjects to allow  
 1552 for potential attrition. We note, however, that if recruitment of that higher number of subjects  
 1553 becomes problematic (and we have observed in our current pilot study the difficulties inherent in  
 1554 recruitment for a similar prevention trial), we will stop subject recruitment at a smaller number of  
 1555 subjects, though ideally not less than 480 (see Table 9), such that we are adequately powered.

1556

1557 **Analysis for Possible Effect Modifiers**

1558 The variables that are listed in the previous section as moderators (e.g., race/ethnicity, genetic  
 1559 risk score, etc.) will be entered appropriately into the analytic model as interaction terms in order  
 1560 to test the effect of the moderator on the outcome (child BMI trajectory). Relevant three-way  
 1561 interactions (e.g., child gender by age by group) will also be tested.

1562

1563 **Analysis for Possible Effect Mediators**

1564 The variables that are listed in the previous section as mediators/covariates will be entered into  
 1565 the analytic model as time-varying covariates and their effects on the outcome will be assessed  
 1566 accordingly, controlling for all else in the model.

1567

1568 **Secondary Hypotheses and Analysis**

1569

1570 Secondary Analyses: We list below two sets of secondary analyses. The first is specific to our  
 1571 primary analysis (see Aim 1, Hypothesis 1); the second is specific to the secondary aims and  
 1572 related hypotheses (see Aims 2-6) and contained under section 11.9 (below).

1573

1574 **Secondary Analyses in relation to the Primary Hypothesis and Analysis**

1575

1576 1) Timing of adiposity rebound: We anticipate that we will be able to characterize and  
1577 capture the timing of adiposity rebound for many of the children enrolled in the study. At  
1578 time of enrollment, each child is at least three years of age and is less than six years of  
1579 age (and we will know, including fractions, how old they are at enrollment by collecting  
1580 their date of birth); measurement occasion six will occur at least three years after  
1581 enrollment. Using these conditions, those who enroll on their third birthday will be at  
1582 least six years old at measurement occasion six (and everyone else will be older); in this  
1583 scenario it is reasonable to assume that most subjects who enroll at age three will have  
1584 reached adiposity rebound by measurement occasion six, although we will miss some  
1585 children who have earlier/later rebound timing. Also, virtually all children who enroll at  
1586 age four should experience adiposity rebound during the study, but a few might be  
1587 earlier than four or later than seven. Finally, the majority of those who enroll at age five  
1588 should experience adiposity rebound during the study, but a minority will have  
1589 rebounded prior to age five. Note that the mean age at adiposity rebound is a simple  
1590 function of the coefficients from the main model:  $-\beta_2/(2*\beta_3)$  will be the nadir for the control  
1591 group (and a similar calculation captures the intervention group:

1592  $-\beta_4/(2*\beta_5)$ ).

1593 2) The effect of parental change in BMI over the study period on child's growth trajectory: In  
1594 this study, this effect will be modeled by including baseline BMI of the parent as a  
1595 predictor, and also including other measures of parent BMI as time-varying covariates  
1596 (i.e., the value of the covariate depends on the measurement occasion).

1597 3) We will test the difference between mean BMI for both groups at the end of the trial (36  
1598 months) to determine whether they are significantly different from one another, thus  
1599 adding additional information to our analyses.

1600 4) We will test whether the trajectories of both normal and overweight children in the  
1601 treatment group accelerate at a slower rate than those in the control group over time,  
1602 such that those in the treatment group will be less likely to evidence trajectories of  
1603 obesity compared to those in the control group. Each child will be categorized as having,  
1604 or not having, an acceptable BMI trajectory. This binary variable will be the outcome  
1605 variable for this secondary analysis. We will test this first, in an unadjusted analysis (a 2  
1606 by 2 table where one variable is the outcome variable and the other is group [control or  
1607 treatment]), and then in an adjusted analysis using logistic regression. Predictors in the  
1608 logistic regression will include demographics (e.g., gender) and various baseline  
1609 variables, including the baseline BMI weight category (i.e., normal or overweight).

1610 5) In a series of secondary analyses, we will examine the random-effects in more detail:

1611 1. Using our original fitted model, we will impose an independent covariance matrix  
1612 (which assumes no correlation between random effects), reducing the resulting  
1613 number of random effects from seven to five. The results of this change to the model  
1614 will inform us about the next two steps (see below).

1615 2. We will add the two age-squared terms (for intervention and control) as random  
1616 effects, continuing to use the independence structure, and bringing the number of  
1617 random effects back to seven.

- 1618 3. Keeping the two age-squared terms as random effects, we will return to an  
1619 unstructured covariance matrix, bringing the number of random-effects to 13.
- 1620 4. At each step in the above process, we will evaluate the results of continuing to add  
1621 additional random effects terms, including noting model convergence problems.  
1622 While we believe the model with 13 random effects will have reduced power and thus  
1623 do not propose this model for our primary analysis, we believe that fitting this model  
1624 in a secondary analysis, via the systematic steps outlined above, will allow us to  
1625 examine the consequences of including a large number of random effects and  
1626 determine the viability of this alternate model.
- 1627 5. It is possible that in addition to different ICC's per condition, variability may occur  
1628 across sessions within condition, such that a range of ICCs exists. If that range is  
1629 determined to be sufficiently wide, we will consider adding cluster-adjusted standard  
1630 errors for both the fixed and random-effects. Note that this type of standard error is a  
1631 generalization of the traditional sandwich estimator; StataCorp has provided a FAQ  
1632 on this generalization with citations:  
1633 [http://www.stata.com/support/faqs/stat/robust\\_ref.html](http://www.stata.com/support/faqs/stat/robust_ref.html).

1634

## 1635 **Additional Analyses**

1636

### 1637 **Secondary Analyses in relation to the Secondary Aims and Hypotheses**

1638 In addition to the above analyses, we will conduct analyses necessary to support our secondary  
1639 aims of the trial, as outlined below.

1640

#### 1641 **Aim 2: Compare the effect of the intervention in children who made significant changes 1642 in their dietary and/or physical activity behaviors to the effect in children who did not.**

1643 Hypothesis 2: Relative to children in the control condition, children participating in the treatment  
1644 condition will:

1645 2.1 Have lower sedentary activity levels (as measured by actigraphy data) after the intensive  
1646 phase of the intervention (T2) and at study completion and/or

1647 2.2 Have better adherence to age-specific USDA nutrition recommendations, (e.g., age-  
1648 appropriate total calories increased, fruits and vegetables, decreased sugar sweetened  
1649 beverages [measured via diet recall data]), after the intensive phase (T2) and at study  
1650 completion.

1651

#### 1652 **Analysis:**

1653 **(2.1)** A multiple regression model in which child sedentary activity level is regressed on group,  
1654 controlling for baseline sedentary activity level and including other relevant covariates (e.g.,  
1655 child gender), will be fit at T2 and at study completion.

1656 **(2.2)** Each child will be categorized as evincing, or not evincing, adherence to age-specific  
1657 USDA recommendations (as defined in the hypothesis). This binary variable will be the outcome  
1658 variable for this secondary analysis. We will test this first in an unadjusted analysis (a 2 x 2 table  
1659 in which one variable is the outcome variable and the other is group [treatment or control]), and

1660 then in an adjusted logistic regression analysis predicting adherence category membership and  
1661 including appropriate covariates (e.g., gender, baseline BMI) in addition to group.

1662

1663 **Aim 3: Evaluate the effect of parents' physical activity levels and dietary behaviors on**  
1664 **children's levels of the same.**

1665 Hypothesis 3: Parents who have significantly lower sedentary activity levels (compared to  
1666 baseline) after treatment or who have better adherence to USDA nutrition recommendations  
1667 (age-appropriate total calories increased fruits and vegetables, decreased sugar sweetened  
1668 beverages [measured via diet recall data]) will be more likely than parents who have higher  
1669 sedentary activity levels or who do not adhere to USDA nutrition recommendations to have  
1670 children who will show

1671 3.1: Decreased sedentary activity levels post-treatment and

1672 3.2: Better adherence to USDA nutrition recommendations (as measured in 2.2, above).

1673

1674 **Analysis:**

1675 Two binary predictors will be created denoting whether parents have significantly lower  
1676 sedentary activity compared to baseline (yes/no) and whether they have appropriate versus  
1677 inappropriate dietary adherence (yes/no). These dichotomous variables will be entered into  
1678 models as follows:

1679 **(3.1)** A multiple regression model will be fit at T2 and at study completion in which child's  
1680 sedentary activity level is regressed on group, controlling for baseline child sedentary level, and  
1681 including the parent dichotomous variables, and two two-way interactions between the parent  
1682 variables and group (treatment or control) (and including other relevant covariates [e.g.,  
1683 gender]).

1684 **(3.2)** A logistic regression model will be fit at T2 and at study completion in which the binary  
1685 child adherence variable (see hypothesis 2.2) is regressed on group and including the parent  
1686 dichotomous variables and two two-way interactions between the parent variables and group  
1687 (treatment or control)

1688 (and including other relevant covariates [e.g., gender]).

1689

1690 **Aim 4: Explore the potential for developing new social networks and their effect on child**  
1691 **nutrition and physical activity.**

1692 Hypothesis 4: Parents in the treatment group will develop new social networks and the strength  
1693 of those social networks will be positively associated with reduced sedentary activity levels and  
1694 improved dietary behaviors (measured as indicated above) among both parents and children.

1695

1696 **Analysis:**

1697 A social network analysis will be conducted to determine the strength and cohesion of parents'  
1698 reported networks. The effect of these networks on parental and child sedentary activity levels  
1699 and dietary behavior will be estimated. Social network analysis will be conducted using the

1700 software packages UCINET and In-Flow. UCINET will be used for entering and analyzing  
1701 network data and, along with In-flow, for generating network measures and graphical displays.  
1702 This data set will thus contain both network and attribute variables at the individual level of  
1703 analysis. Applying standard statistical techniques (e.g., regression, logistic regression, etc.)  
1704 these independent variables will be modeled with selected dependent variables. The analysis  
1705 will examine the change in these social networks over time and their impact on the main  
1706 outcomes of interest including: growth trajectories (children's BMI); body composition (child and  
1707 adult), parenting practices (child feeding); physical activity (child and adult), and total energy  
1708 intake. The social network hypothesis suggests that members of a given network group will  
1709 share health behavior characteristics more than members of other groups.

1710

1711 **Aim 5: Evaluate the moderating relationship between genetic risk factors and child BMI**  
1712 **trajectories over the course of the study.**

1713 Hypothesis 5: Higher levels of child genetic susceptibility to obesity (i.e., a higher genetic risk  
1714 score (Kathiresan, Voight et al. 2009)) will be significantly associated with heavier-for-age BMI  
1715 at baseline, and this susceptibility will moderate children's growth in BMI over time.

1716

1717 **Analysis:**

1718 "Heavier-for-age-BMI at baseline", the outcome, will be regressed on genetic risk score and the  
1719 interaction between risk score and time, controlling for other covariates as deemed important  
1720 (e.g., child gender, etc.).

1721

1722 **Aim 6: Assess the degree to which implementation of the GROW program encourages**  
1723 **additional lifestyle programming for preschool children and their parents in the Metro**  
1724 **Community Centers.**

1725 Hypothesis 6: The two Metro Community centers participating in the GROW trial will implement  
1726 a higher number of activity or nutrition programs for families (as defined by the centers) with  
1727 young children at the end of the study compared to the number they implemented at baseline,  
1728 and they will also implement a higher number after the study compared to the number  
1729 implemented by non-participating Metro Community Centers.

1730

1731 **Analysis:**

1732 A simple count of the number of activity and nutrition programs will be taken at baseline within  
1733 both Community Centers (i.e., East and Coleman) and then again at the end of the study to  
1734 determine whether the number at study end within each center exceeds that at baseline.  
1735 Similarly, counts will be taken of these types of programs at non-participating Metro Community  
1736 Centers at baseline and study end and these numbers will be compared to counts at both East  
1737 and Coleman to determine if both participating centers have higher numbers than the non-  
1738 participating centers at baseline and at study end.

1739

1740

1741

1742 **References**

1743

- 1744 1. Kathiresan S, Voight BF, Purcell S, et al. Genome-wide association of early-onset  
1745 myocardial infarction with single nucleotide polymorphisms and copy number variants. *Nat*  
1746 *Genet* 2009;41:334-41.
- 1747 2. Brantley PJ, Myers VH, Roy HJ. Environmental and lifestyle influences on obesity. *J La*  
1748 *State Med Soc* 2005;157 Spec No 1:S19-27.
- 1749 3. Carnell S, Wardle J. Appetite and adiposity in children: evidence for a behavioral  
1750 susceptibility theory of obesity. *Am J Clin Nutr* 2008;88:22-9.
- 1751 4. Webber L, Hill C, Saxton J, Van Jaarsveld CH, Wardle J. Eating behaviour and weight in  
1752 children. *Int J Obes (Lond)* 2008.
- 1753 5. Witkos M, Uttaburanont M, Lang CD, Arora R. Costs of and reasons for obesity. *J*  
1754 *Cardiometab Syndr* 2008;3:173-6.
- 1755 6. Zizza C, Siega-Riz AM, Popkin BM. Significant Increase in Young Adults' Snacking  
1756 between 1977–1978 and 1994–1996 Represents a Cause for Concern. *Prev Med* 2001;32:303-  
1757 10
- 1758 7. Ogden CL, Flegal KM, Carroll MD, Johnson CL. Prevalence and trends in overweight  
1759 among US children and adolescents, 1999-2000. *Jama* 2002;288:1728-32.
- 1760 8. Ogden CL, Fryar CD, Carroll MD, Flegal KM. Mean body weight, height, and body mass  
1761 index, United States 1960-2002. *Advance data* 2004:1-17.
- 1762 9. Suminski RR, Poston WS, Jackson AS, Foreyt JP. Early identification of Mexican  
1763 American children who are at risk for becoming obese. *International journal of obesity and*  
1764 *related metabolic disorders : journal of the International Association for the Study of Obesity*  
1765 1999;23:823-9.
- 1766 10. Olshansky SJ, Passaro DJ, Hershow RC, et al. A potential decline in life expectancy in  
1767 the United States in the 21st century. *N Engl J Med* 2005;352:1138-45.
- 1768 11. Nader PR, O'Brien M, Houts R, et al. Identifying risk for obesity in early childhood.  
1769 *Pediatrics* 2006;118:e594-601.
- 1770 12. Must A, Jacques PF, Dallal GE, Bajema CJ, Dietz WH. Long-term morbidity and  
1771 mortality of overweight adolescents. A follow-up of the Harvard Growth Study of 1922 to 1935.  
1772 *N Engl J Med* 1992;327:1350-5.
- 1773 13. Barker DJ, Osmond C, Forsen TJ, Kajantie E, Eriksson JG. Trajectories of growth  
1774 among children who have coronary events as adults. *N Engl J Med* 2005;353:1802-9.
- 1775 14. Leunissen RW, Kerkhof GF, Stijnen T, Hokken-Koelega A. Timing and tempo of first-  
1776 year rapid growth in relation to cardiovascular and metabolic risk profile in early adulthood.  
1777 *JAMA* 2009;301:2234-42.
- 1778 15. Birch L, Ventura, AK. Preventing childhood obesity: what works? *Int J Obes (Lond)*  
1779 2009;33:74-81.
- 1780 16. Kropfki JA, Keckley PH, Jensen GL. School-based obesity prevention programs: an  
1781 evidence-based review. *Obesity (Silver Spring)* 2008;16:1009-18.
- 1782 17. Summerbell CD, Waters E, Edmunds LD, Kelly S, Brown T, Campbell KJ. Interventions  
1783 for preventing obesity in children. *Cochrane Database Syst Revs* 2005.
- 1784 18. Small DM, Jones-Gotman M, Dagher A. Feeding-induced dopamine release in dorsal  
1785 striatum correlates with meal pleasantness ratings in healthy human volunteers. *Neuroimage*  
1786 2003;19:1709-15.
- 1787 19. Institute of Medicine. Committee on Progress in Preventing Childhood Obesity. *Progress*  
1788 *in Preventing Childhood Obesity: How do we measure up: The National Academies Press;*  
1789 *September 2006.*



- 1790 20. Levine AS, Kotz CM, Gosnell BA. Sugars and fats: the neurobiology of preference. *The*  
1791 *Journal of nutrition* 2003;133:831S-4S.
- 1792 21. U.S. Department of Health and Human Services. Strategic plan for NIH obesity  
1793 research: a report of the NIH Obesity Research Task Force, National Institutes of Health.  
1794 Rockville, MD2004.
- 1795 22. Epstein LH, Wing RR, Koeske R, Valoski A. Long-term effects of family-based treatment  
1796 of childhood obesity. *J Consult Clin Psychol* 1987;55:91-5.
- 1797 23. Crockett SJ, Mullis RM, Perry CL. Parent nutrition education: a conceptual model. *J Sch*  
1798 *Health* 1988;58:53-7.
- 1799 24. Strauss RS, Knight J. Influence of the home environment on the development of obesity  
1800 in children. *Pediatrics* 1999;103:e85.
- 1801 25. Wilson TA, Adolph AL, Butte NF. Nutrient adequacy and diet quality in non-overweight  
1802 and overweight Hispanic children of low socioeconomic status: the Viva la Familia Study. *J Am*  
1803 *Diet Assoc* 2009;109:1012-21.
- 1804 26. Epstein LH, Myers MD, Raynor HA, Saelens BE. Treatment of pediatric obesity.  
1805 *Pediatrics* 1998;101:554-70.
- 1806 27. Epstein LH, Valoski A, Wing RR, McCurley J. Ten-year outcomes of behavioral family-  
1807 based treatment for childhood obesity. *Health Psychol* 1994;13:373-83.
- 1808 28. Kamath CC, Vickers KS, Ehrlich A, et al. Clinical review: behavioral interventions to  
1809 prevent childhood obesity: a systematic review and metaanalyses of randomized trials. *The*  
1810 *Journal of clinical endocrinology and metabolism* 2008;93:4606-15.
- 1811 29. Perusse L, Tremblay A, Leblanc C, Bouchard C. Genetic and environmental influences  
1812 on level of habitual physical activity and exercise participation. *Am J Epidemiol* 1989;129:1012-  
1813 22.
- 1814 30. Barkeling B, Ekman S, Rossner S. Eating behaviour in obese and normal weight 11-  
1815 year-old children. *International journal of obesity and related metabolic disorders : journal of the*  
1816 *International Association for the Study of Obesity* 1992;16:355-60.
- 1817 31. Jansen A, Theunissen N, Slechten K, et al. Overweight children overeat after exposure  
1818 to food cues. *Eat Behav* 2003;4:197-209.
- 1819 32. American Dietetic Association. Position of the American Dietetic Association: individual-,  
1820 family-, school-, and community-based interventions for pediatric overweight. *J Am Diet Assoc*  
1821 2006;106:925-45.
- 1822 33. Wilson DK, Kirtland KA, Ainsworth BE, Addy CL. Socioeconomic status and perceptions  
1823 of access and safety for physical activity. *Ann Behav Med* 2004;28:20-8.
- 1824 34. Prevalence of Underweight Among Children and Adolescents: United States, 2003-  
1825 2006. 2009. (Accessed September 30, 2009, at  
1826 [http://www.cdc.gov/nchs/data/hestat/underweight\\_children.pdf](http://www.cdc.gov/nchs/data/hestat/underweight_children.pdf).)
- 1827 35. Sallis JF, Hovell MF, Hofstetter CR, et al. Distance between homes and exercise  
1828 facilities related to frequency of exercise among San Diego residents. *Public Health Rep*  
1829 1990;105:179-85.
- 1830 36. Estabrooks PA, Lee RE, Gyurcsik NC. Resources for physical activity participation: does  
1831 availability and accessibility differ by neighborhood socioeconomic status? *Ann Behav Med*  
1832 2003;25:100-4.
- 1833 37. Gordon-Larsen P, Griffiths P, Bentley ME, et al. Barriers to Physical Activity: Qualitative  
1834 Data on Caregiver-Daughter Perceptions and Practices. *Am J Prev Med* 2004;27:218-23.
- 1835 38. de la Haye K, Robins, G., Mohr, P., Wilson, C. . Obesity-related behaviors in adolescent  
1836 friendship networks. *Soc Networks* 2010;32:161-7.
- 1837 39. Valente TW, Fujimoto K, Chou CP, Spruijt-Metz D. Adolescent affiliations and adiposity:  
1838 a social network analysis of friendships and obesity. *J Adolesc Health* 2009;45:202-4.
- 1839 40. Bahr DB, Browning RC, Wyatt HR, Hill JO. Exploiting social networks to mitigate the  
1840 obesity epidemic. *Obesity (Silver Spring)* 2009;17:723-8.

1841 41. Christakis NA, Fowler JH. The spread of obesity in a large social network over 32 years.  
1842 N Engl J Med 2007;357:370-9.

1843 42. Gesell SB, Tesdahl, E., Ruchman, E. The Distribution of Physical Activity in an  
1844 Afterschool Friendship Network. Pediatrics 2012.

1845 43. Gesell SB, Bess, K., Barkin, S.L. Understanding the new social networks that form within  
1846 the context of an obesity prevention intervention. Journal of Obesity 2012.

1847 44. Valente T. In: Gesell S, ed.2011.

1848 45. Smith KP, Christakis, Nicholas A. Social Networks and Health. Annual Reviews  
1849 2008;34:405-29.

1850 46. Coady SA, Jaquish CE, Fabsitz RR, Larson MG, Cupples LA, Myers RH. Genetic  
1851 variability of adult body mass index: a longitudinal assessment in framingham families. Obes  
1852 Res 2002;10:675-81.

1853 47. Wardle J, Carnell S, Haworth CM, Plomin R. Evidence for a strong genetic influence on  
1854 childhood adiposity despite the force of the obesogenic environment. Am J Clin Nutr  
1855 2008;87:398-404.

1856 48. Willer CJ, Speliotes EK, Loos RJ, et al. Six new loci associated with body mass index  
1857 highlight a neuronal influence on body weight regulation. Nat Genet 2009;41:25-34.

1858 49. Baker DW. The meaning and the measure of health literacy. J Gen Intern Med  
1859 2006;21:878-83.

1860 50. Jenkins GP, Aronsky D. A feasibility study for the computerized recruitment of subjects  
1861 for research studies. AMIA Annu Symp Proc 2005:996.

1862 51. Neuman SB, Celano, Donna. Every Child Ready to Read. 2nd ed: Association for  
1863 Library Service to Children (ALSC) and the Public Library Association (PLA); 2011.

1864 52. Chrispeels JH WJ, Rivero E. Evaluation summary of the Impact of the Parent Institute for  
1865 Quality Education on Parent's Engagement with their Children's Schooling. Santa Barbara:  
1866 University of California; 2000.

1867 53. Collins LM, Murphy SA, Bierman KL. A conceptual framework for adaptive preventive  
1868 interventions. Prev Sci 2004;5:185-96.

1869 54. Foxton J. The right measure. Nurs Stand 2006;20:22-3.

1870 55. Deurenberg P. Validation of body composition methods and assumptions. Br J Nutr  
1871 2003;90:485-6.

1872 56. Kohrt WM. Preliminary evidence that DEXA provides an accurate assessment of body  
1873 composition. J Appl Physiol 1998;84:372-7.

1874 57. Lohman TG, Harris M, Teixeira PJ, Weiss L. Assessing body composition and changes  
1875 in body composition. Another look at dual-energy X-ray absorptiometry. Ann N Y Acad Sci  
1876 2000;904:45-54.

1877 58. Center for Disease Control and Prevention. National Health and Nutrition Examination  
1878 Survey (NHANES): Anthropometry Procedures Manual2007.

1879 59. Freedman DS, Katzmarzyk PT, Dietz WH, Srinivasan SR, Berenson GS. The relation of  
1880 BMI and skinfold thicknesses to risk factors among young and middle-aged adults: the Bogalusa  
1881 Heart Study. Ann Hum Biol 2010;37:726-37.

1882 60. Rowe DA, Dubose KD, Donnelly JE, Mahar MT. Agreement between skinfold-predicted  
1883 percent fat and percent fat from whole-body bioelectrical impedance analysis in children and  
1884 adolescents. International journal of pediatric obesity : IJPO : an official journal of the  
1885 International Association for the Study of Obesity 2006;1:168-75.

1886 61. Addo OY, Himes JH. Reference curves for triceps and subscapular skinfold thicknesses  
1887 in US children and adolescents. Am J Clin Nutr 2010;91:635-42.

1888 62. Eisenmann JC, Heelan KA, Welk GJ. Assessing body composition among 3- to 8-year-  
1889 old children: anthropometry, BIA, and DXA. Obes Res 2004;12:1633-40.

- 1890 63. Donahue SM, Rifas-Shiman SL, Gold DR, Jouni ZE, Gillman MW, Oken E. Prenatal fatty  
1891 acid status and child adiposity at age 3 y: results from a US pregnancy cohort. *Am J Clin Nutr*  
1892 2011;93:780-8.
- 1893 64. de Vries SI, Bakker I, Hopman-Rock M, Hirasings RA, van Mechelen W. Clinimetric  
1894 review of motion sensors in children and adolescents. *J Clin Epidemiol* 2006;59:670-80.
- 1895 65. Brage S, Wedderkopp N, Andersen LB, Froberg K. Influence of step frequency on  
1896 movement intensity predictions with the CSA accelerometer: a field validation study in children.  
1897 *Pediatr Exer Sci* 2003;35 277-87.
- 1898 66. Trost SG, Way R, Okely AD. Predictive validity of three ActiGraph energy expenditure  
1899 equations for children. *Med Sci Sports Exerc* 2006;38:380-7.
- 1900 67. Treuth MS, Schmitz K, Catellier DJ, et al. Defining accelerometer thresholds for activity  
1901 intensities in adolescent girls. *Med Sci Sports Exerc* 2004;36:1259-66.
- 1902 68. Mattocks C, Leary S, Ness A, et al. Calibration of an accelerometer during free-living  
1903 activities in children. *International journal of pediatric obesity : IJPO : an official journal of the*  
1904 *International Association for the Study of Obesity* 2007;2:218-26.
- 1905 69. Puyau MR, Adolph AL, Vohra FA, Zakeri I, Butte NF. Prediction of activity energy  
1906 expenditure using accelerometers in children. *Med Sci Sports Exerc* 2004;36:1625-31.
- 1907 70. Schmitz KH, Treuth M, Hannan P, et al. Predicting energy expenditure from  
1908 accelerometry counts in adolescent girls. *Med Sci Sports Exerc* 2005;37:155-61.
- 1909 71. Ng DP, Koh D, Choo S, Chia KS. Saliva as a viable alternative source of human  
1910 genomic DNA in genetic epidemiology. *Clin Chim Acta* 2006;367:81-5.
- 1911 72. Environmental Supports for Physical Activity Questionnaire. Prevention Research  
1912 Center, Norman J. Arnold School of Public Health, University of South Carolina, 2002, October.  
1913 (Accessed January 29, 2009, at  
1914 [http://prevention.sph.sc.edu/tools/docs/Env\\_Supports\\_for\\_PA.pdf](http://prevention.sph.sc.edu/tools/docs/Env_Supports_for_PA.pdf).)
- 1915 73. Kirtland KA, Porter DE, Addy CL, et al. Environmental measures of physical activity  
1916 supports: perception versus reality. *Am J Prev Med* 2003;24:323-31.
- 1917
- 1918

1919  
1920

1921 **Revised Protocol**

1922 **Specific Aims**

1923 This research includes one primary and five secondary specific aims:

1924

1925 Primary Aims:

- 1926 1. **Aim 1:** Evaluate the efficacy of a multi-level intervention, addressing nutrition and  
1927 physical activity, at public community recreation centers with high-risk parent- preschool  
1928 child (ages 3-5) dyads to promote pediatric obesity prevention.  
1929 1.1. **Hypothesis 1:** The BMI trajectories of children in the treatment group will accelerate  
1930 at a slower rate than those in the control group over time.

1931

1932 Secondary Aims:

- 1933 2. **Aim 2:** Compare the effect of the intervention in children who made significant changes  
1934 in their dietary and/or physical activity behaviors to the effect in children who did not.  
1935 2.1. **Hypothesis 2:** Relative to children in the control condition, children participating in  
1936 the treatment condition will:  
1937 2.1.1. Have lower sedentary activity levels (as measured by actigraphy data)  
1938 after the intensive phase of the intervention (T2) and at study completion and  
1939 2.1.2. Have better adherence to age-specific USDA nutrition recommendations,  
1940 (e.g., age-appropriate total calories increased fruits and vegetables, decreased  
1941 sugar sweetened beverages [measured via diet recall data]), after the intensive  
1942 phase (T2) and at study completion.  
1943  
1944 3. **Aim 3:** Evaluate the effect of parents' physical activity levels and dietary behaviors on  
1945 children's levels of the same.  
1946 3.1. **Hypothesis 3:** Parents who have significantly lower sedentary activity levels  
1947 (compared to baseline) after treatment and who have better adherence to USDA  
1948 nutrition recommendations (age-appropriate total calories increased fruits and  
1949 vegetables, decreased sugar sweetened beverages [measured via diet recall data]) will  
1950 be more likely than parents who have higher sedentary activity levels and who do not  
1951 adhere to USDA nutrition recommendations to have children who will show  
1952 3.1.1. Decreased sedentary activity levels post-treatment and  
1953 3.1.2. Better adherence to USDA nutrition recommendations  
1954  
1955 4. **Aim 4:** Explore the potential for developing new social networks and their effect on child  
1956 nutrition and physical activity.  
1957 4.1. **Hypothesis 4:** Parents in the treatment group will develop new social networks and  
1958 the strength of those social networks will be positively associated with reduced  
1959 sedentary activity levels and improved dietary behaviors (measured as indicated above)  
1960 among both parents and children.  
1961  
1962 5. **Aim 5:** Evaluate the moderating relationship between genetic risk factors and child BMI  
1963 trajectories over the course of the study.  
1964 5.1. **Hypothesis 5:** Higher levels of child genetic susceptibility to obesity (i.e., a higher  
1965 genetic risk score)<sup>9</sup> will be significantly associated with heavier-for-age BMI at baseline,  
1966 and this susceptibility will moderate children's growth in BMI over time.  
1967

- 1968
  - 1969
  - 1970
  - 1971
  - 1972
  - 1973
  - 1974
  - 1975
  - 1976
  - 1977
  - 1978
  - 1979
  - 1980
  - 1981
  - 1982
  - 1983
  - 1984
  - 1985
  - 1986
  - 1987
  - 1988
  - 1989
  - 1990
  - 1991
  - 1992
  - 1993
  - 1994
  - 1995
  - 1996
  - 1997
  - 1998
  - 1999
  - 2000
  - 2001
  - 2002
  - 2003
  - 2004
  - 2005
6. **Aim 6:** Assess the degree to which implementation of the GROW program encourages additional lifestyle programming for preschool children and their parents in the Metro Community Centers.
    - 6.1. **Hypothesis 6:** The two Metro Community centers participating in the GROW trial will implement a higher number of activity and or nutrition programs for families (as defined by the centers) with young children at the end of the study compared to the number they implemented at baseline, and they will also implement a higher number after the study compared to non-participating Metro Community Centers.
  
  7. **Aim 7:** Determine if obesity-related behaviors (physical activity, willingness to actively manage one's own health, weight loss) can spread through new social relationships (ACTIVATE).
    - 7.1. **Hypothesis 7:** After controlling for homophily (the tendency of individuals to be associated with similar others), and other confounding network effects, adults' changes in physical activity (as measured by accelerometry, activation as measured by the PAM, and weight loss as measured by BMI) will be associated with similar changes among other adults in their social networks.
  
  8. **Aim 8:** For women who become pregnant during the GROW trial, to compare the trajectory of maternal gestational weight gain (GWG) in women exposed to the GROW intervention to women in the control condition (GROW Baby).
    - 8.1. **Hypothesis 8:** More women in the intervention will have a GWG trajectory that is consistent with IOM guidelines for appropriate GWG based on pre-pregnancy BMI.
  
  9. **Aim 9:** To compare infant growth trajectories from birth through 6 months of life in infants of women exposed to the GROW intervention with infants of women in the control condition (GROW Baby).
    - 9.1. **Hypothesis 9:** Fewer infants of women in the intervention will have rapid weight gain in the first 6 months of life compared to infants of women in the control condition.

**Background**

***Early childhood is a critical time for obesity prevention.***

2006 Changes in physical activity and diet, among many other factors, have contributed to epidemic  
 2007 levels of childhood obesity in the U.S.<sup>1-5</sup> Obesity rates have tripled among children and  
 2008 adolescents over the past thirty years<sup>6,7</sup>, with Latino and African-American populations at  
 2009 disproportionately higher risk.<sup>3,7,8</sup> At the current rates of childhood obesity, 30 to 40% of today's  
 2010 children may eventually develop type 2 diabetes and reduce their life expectancy.<sup>9</sup> Nader et al  
 2011 demonstrated that children who were ever overweight during the preschool period were five  
 2012 times as likely to be overweight adolescents.<sup>10</sup> And the chances of overweight increases as the  
 2013 child ages. In that same study, 80% of school-age children who were ever overweight during  
 2014 this period went on to become overweight adolescents. The significance of mounting risk for  
 2015 sustained overweight and its consequences cannot be overstated. In the Harvard Growth Study,  
 2016 overweight adolescents as adults had a two-fold increase in all-cause mortality and an



2017 increased morbidity due to cardiovascular disease.<sup>11</sup> It is not merely overweight/obesity in  
2018 childhood that poses the risk for later increased mortality and morbidity as an adult, **the slope**  
2019 **of early weight gain is a potent predictor.**<sup>12,13</sup> For example, Leunisson et al showed that rapid  
2020 weight gain without concomitant growth in height during the first three months of infancy is  
2021 linked with reduced insulin sensitivity in early adulthood. **Furthermore, Barker et al**  
2022 **demonstrated that the risk of adult coronary events was more strongly related to the**  
2023 **rapid childhood gain in BMI than to BMI attained at any particular age.**<sup>12</sup> **Consequently,**  
2024 **this proposal will address prevention of rapid BMI gain during early childhood, fostering**  
2025 **normal growth for those children who have a normal BMI (>50% and <85%) and**  
2026 **improving BMI trajectories for those children who already have a BMI ≥ 85% <95% at**  
2027 **ages 3-5 years.** There is little evidence documenting successful behavioral interventions to  
2028 *prevent* early childhood obesity<sup>14-16</sup> and even less evidence concerning which factors may be  
2029 crucial to success. Consequently, the Institute of Medicine (IOM)<sup>17,18</sup> and the *Strategic Plan for*  
2030 *NIH Obesity Research*<sup>19,20</sup> call for a community-engaged, culturally-relevant, family-centered  
2031 approach to obesity prevention that can be sustainable.

2032

2033 ***Family plays a crucial role in pediatric obesity prevention.***

2034 Family influences normative expectations of how and what to eat as well as how often to be  
2035 physically active.<sup>21,22</sup> Moreover, families control the home environment that shapes children's  
2036 early childhood choices, establishing behavioral habits.<sup>23</sup> For example, in the Viva La Familia  
2037 study, random 24-hour dietary recalls of almost 1000 children showed that 67% of children's  
2038 meals occurred at home and that most of these meals were high density, low nutrient foods,  
2039 consistent with their parents' choices.<sup>24</sup> Parental involvement in programs to reduce overweight  
2040 in children has been moderately successful, and is considered an important component of  
2041 weight loss programs targeting children.<sup>25,26</sup> Many of these programs were focused on  
2042 treatment, however, the same association appears to exist for prevention efforts as reported in a  
2043 recent meta-analyses of randomized trials to prevent childhood obesity.<sup>27</sup> Parents' role appears  
2044 to be as both models to their children and as active participants in creating a healthy  
2045 environment that encourages healthy lifestyles. Children are nearly six times more likely to be  
2046 physically active if their parents are physically active.<sup>28</sup>

2047 One important component of parental involvement is the use of behavior change methods such  
2048 as parent-child contracting to set clear goals for nutrition and activity and self-monitoring of  
2049 caloric intake and activity.<sup>26,29</sup> Epstein's report of 10-year treatment outcomes for obese children  
2050 indicates long-term success among families who used parent-child contracts to set clear  
2051 goals.<sup>26</sup> In a 2006 position paper, the American Dietetic Association (ADA)<sup>30,31</sup> recommended  
2052 that effective, developmentally appropriate pediatric obesity interventions include the following  
2053 elements:

- 2054 1) Parent training/modeling (involving behavioral counseling targeted at parents to improve their  
2055 parenting skills);
- 2056 2) Behavior modification training (involving goal setting, modeling, and self-monitoring);
- 2057 3) Promotion of physical activity (including the reduction of sedentary behaviors); and
- 2058 4) Nutrition counseling/education (including the provision of more general information on foods,  
2059 shopping, and nutrition to promote healthful eating).

2060



2061 ***Obesity is impacted by both the physical and social environment.***

2062 It is not only the family that exerts influence over preschooler nutrition and physical activity  
2063 habits, but both the physical and social environment.

2064 ***Physical Environment:*** A developing area of research examines the impact of access to physical  
2065 activity on increased activity levels. In a study by Wilson et al, access to physical activity such  
2066 as neighborhood trails was associated with increased physical activity in low SES groups.<sup>32</sup>  
2067 These same groups tend to have a higher likelihood of obesity.<sup>33</sup> Likewise, Sallis et al  
2068 discovered that proximity of exercise facilities to one's home was associated with increased  
2069 amounts of exercise.<sup>34</sup> Unfortunately, more physical activity barriers exist for residents living in  
2070 poorer communities. For example, Estabrooks found that fewer free physical activity resources,  
2071 such as parks and playground exist, in poorer communities.<sup>35</sup> Lack of affordable, safe, and  
2072 accessible recreation facilities and programs have been cited as contributing to children's  
2073 watching more TV at home, which in turn is associated with increased rates of obesity.<sup>4,36</sup>  
2074 Creating links to free, accessible recreation would be especially important in areas where low  
2075 SES populations live. **Public community centers provide access to physical activity for  
2076 those populations at highest risk for obesity. Through our existing partnership between  
2077 the Department of Pediatrics at Vanderbilt University Medical Center (VUMC) and Metro  
2078 Parks and Recreation, we have the opportunity to conduct and test a community center  
2079 based intervention that can reach this high risk population.**

2080 ***Social Environment:*** Research now suggests that we have underestimated the influence of the  
2081 social environment on shaping obesity-related behaviors. Social networks have been linked to  
2082 obesity in adults and adolescents.<sup>37-40</sup> From a recently completed afterschool intervention  
2083 (Gesell PI), we have initial support for our approach to spread physical activity through a newly  
2084 developed network. Results indicated that children's existing friendships heavily influenced their  
2085 routine level of physical activity. The strongest influence on the amount of time children spent in  
2086 moderate-to-vigorous activity in the afterschool hours was the activity level of their immediate  
2087 friends. Children consistently made adjustments to activity levels of 10% or more in order to  
2088 emulate the activity levels of their peers (OR=6.89, p<.01). The child's own age (OR=.92, p<.10)  
2089 and obesity status (OR=.66, p<.10) had statistically significant but relatively small direct effects  
2090 on the individual's activity level. Gender had no direct effect on activity.<sup>41</sup> In another recently  
2091 published study, we found that a new social network evolved among parents enrolled in a  
2092 community-based obesity prevention RCT: Parents selectively formed friendship ties based on  
2093 child BMI z-score, ( $t=2.08$ ,  $p<.05$ ), thus revealing the tendency for mothers to form new  
2094 friendships with mothers whose children have similar body types.<sup>42</sup> Together, this work supports  
2095 our proposition of utilizing the social influences of social networks that form during our  
2096 intervention to amplify obesity-preventing behavior change. In the GROW intervention we will  
2097 build new social networks through: frequent contact and facilitated interaction in structured small  
2098 group activities.

2099 Although the terms are often used interchangeably, social networks differ from social support.  
2100 Social networks, the complex webs of social relationships and social interactions that connect  
2101 individuals, have been shown to be strong influences on behaviors. Social support, however, is  
2102 generally thought not to influence behavior, but rather be a mechanism to cope with challenges  
2103 and facilitate recovery from illness, injury or disease.<sup>43</sup> Methodologically, social support is  
2104 measured from the respondent's perspective to assess the support (e.g., emotional, cognitive,  
2105 tangible support) an individual perceives to have, whereas social networks typically measure the

2106 presence or absence of friendships and task- or work-oriented relationships (which may or may  
2107 not provide support) and treats the ties themselves as objects of study.<sup>44</sup> Social network  
2108 analysis allows us to see the whole group of individuals and their interconnectedness, and is in  
2109 that sense broader than analysis of social support. Due to a dearth of data and to  
2110 methodological challenges, there are fewer studies of how social networks affect health.

2111  
2112 ***Genetic factors play a role in the development of obesity.***

2113 New research demonstrates a genetic risk score (GRS) is a potent predictor of BMI.  
2114 Family studies have demonstrated that genetic factors account for anywhere between 40% and  
2115 70% of the population variance in BMI for individuals with severe obesity.<sup>45,46</sup> Until recently,  
2116 specific genes contributing to BMI in the general population had not been identified. It is now  
2117 clear, however, that certain gene variants exert a substantial, clinically important effect on BMI  
2118 in humans.<sup>47</sup> The GIANT Consortium recently reported the results from large scale studies to  
2119 identify genetic variants contributing to the risk of obesity in both children and adults. In January  
2120 2009, this consortium reported a meta- analysis involving over 100,000 patients, in which 8  
2121 obesity-related risk alleles were conclusively validated far in excess of the standard (5 x 10<sup>-7</sup>)  
2122 for genome-wide statistical significance.<sup>47</sup> Moreover, whereas each particular obesity  
2123 susceptibility variant confers only a modest effect on BMI, a genetic risk score summing each  
2124 individual's number of susceptibility variants across all 8 genes is a more potent predictor of  
2125 obesity.<sup>47</sup> All of the genes are on different chromosomes (unlinked), and therefore, were treated  
2126 as an independent variable. Given that humans have two copies of every autosomal gene,  
2127 each person has 0, 1, or 2 risk alleles at each locus, with a genetic risk score (GRS) ranging  
2128 from 0-16 (for 8 genes, given 2 alleles per locus, maximum score is 16). Even in the general  
2129 population, at the extremes of GRS, BMI ranges from 25- 27 are clearly associated with clinical  
2130 obesity. A novel aspect of the present proposal is that it incorporates genetic data in relation to  
2131 an interventional study to prevent early childhood overweight/obesity. It has now been  
2132 conclusively demonstrated that specific genes predispose to obesity, yet their impact on early  
2133 obesity prevention has not been studied. This critical question must be answered in order to  
2134 translate the findings of genetic studies effectively into clinical practice.

2135  
2136 Prevention must occur in preschool given that 60% of overweight preschoolers will go on to  
2137 become overweight adolescents.<sup>10</sup> By conducting and testing trials in public community  
2138 centers, exportable interventions could result allowing for a macro-level system change to  
2139 address this expanding public health crisis. **Building on the success of an existing  
2140 partnership between Vanderbilt Pediatrics and Metro Parks and Recreation in Nashville,  
2141 TN, the team in this proposal will conduct and evaluate an intervention intended to  
2142 prevent obesity in preschoolers in an approach that affects multiple levels of risk and is  
2143 both family-based and community-centered. This research includes the following  
2144 innovations:**

- 2145 1. Evaluates the trajectory of early BMI gain, as directed by recent scientific discoveries.<sup>12,13,48</sup>
- 2146 2. Conducts a pediatric obesity prevention trial based in public community centers that are  
2147 routinely available to the populations at highest risk.
- 2148 3. Addresses obesity in the understudied period of early childhood – when there may be an  
2149 optimal opportunity to instill long term healthy lifestyles and BMI trajectories.
- 2150 4. Assesses the macro-system level components of community centers and social networks  
2151 and the micro-system level components of parent-child genetics on pediatric obesity  
2152 prevention

2153 5. Is an easily exportable intervention, and we are actively exploring the opportunity to do so  
2154 with the National Association of Counties and the National Recreation and Parks  
2155 Association.  
2156

2157 **Recruitment**

2158 We will recruit 600 adult parents-preschool child dyads (p/c dyads) to participate in this study for  
2159 3-years in duration (**see appendix B for recruitment script**). We will conduct a rolling  
2160 recruitment and enrollment strategy for 18-months until a total of 600 parent-child dyads are  
2161 enrolled. In order to preserve internal and external validity of the study, the success of any  
2162 behavioral intervention is contingent on the researcher's ability to recruit and retain study  
2163 participants. Successful retention of this longitudinal study begins at recruitment.

2164 Recruitment efforts consist of a multi-pronged strategy including: site- specific recruitment at  
2165 community pediatric clinics, WIC offices, Family Resource Centers and Read to  
2166 Succeed/preschool sites, and Coordinated school health sites; study announcements on  
2167 English and Spanish radio programs (**see appendix D for invitation letter, language and  
2168 scripts will be based from this letter**); and bilingual study recruitment flyers (**see appendix C  
2169 for recruitment flyers**) located at neighborhood organizational centers, Walmart, and other  
2170 community agencies where families with young children gather (e.g., daycares, pre-K programs,  
2171 churches). Due to a highly restrictive eligibility criteria of having a child's BMI needing to be in a  
2172 certain range, we will conduct preliminary screens at a location convenient for the family that  
2173 could include other community sites (approved by the IRB as a non-research performance site)  
2174 or participants' homes, only if requested. In addition to these various approaches, we will also  
2175 actively recruit in these other community agencies where families with young children gather. In  
2176 addition, we will identify "community liaisons", well-respected persons considered deeply  
2177 integrated in the community who have knowledge and relationships to easily reach and  
2178 effectively communicate with our target population. Specifically, we will employ 3-6 community  
2179 liaisons from each of the two communities (Northeast and South Nashville) to aid in recruitment  
2180 and retention activities.

2181 In order to assist in recruiting our hard-to-reach target population, we will also use Facebook as  
2182 a viable tool for recruitment. Specifically, we will create a study-specific GROW Facebook page  
2183 open to the general public that will serve as an online advertisement. All wording and language  
2184 used for this Facebook page-will be similar to our hardcopy flyers that will be disseminated in  
2185 the community (**see appendix C for recruitment flyers**). This page will give interested  
2186 participants the opportunity to message research staff who can then schedule a follow-up phone  
2187 call or meeting. Research staff will also have an opportunity to post status updates on upcoming  
2188 recruitment efforts, for example radio announcements or upcoming community-based events  
2189 related to the GROW study. Facebook features such as the "like" feature will be enabled  
2190 whereby individuals that choose to "like" the GROW study page will be updated via their  
2191 newsfeed (the center column of an individual's homepage – a constantly updating list of stories  
2192 from people and pages that they follow on Facebook) whenever our Facebook page updates  
2193 our status. When individuals "like" this page, it also appears in their respective network's  
2194 newsfeeds, thereby potentially exposing the GROW page to other prospective participants.

2195 Participants in the GROW study will also be invited to aid recruitment efforts by voluntarily filling  
2196 out the attached referral form at intervention or control sessions with the names, relationship  
2197 and contact information of other families they may know with a child age 3 to 5. These referred

2198 families would be contacted and invited to participate in the study by research staff either  
2199 by phone or in person. For every family referred who participates in a screening conversation,  
2200 the participant would receive a small token gift of appreciation valued at \$5 (e.g., cooking  
2201 utensils, key chain, Band-Aid holder, etc.). For every family referred that has met eligibility and  
2202 are successfully enrolled in the study, the referring participant would receive a \$10 gift card as a  
2203 small token of our appreciation. Word-of-mouth recruitment has been an effective recruitment  
2204 strategy in our formative phase work. Including small incentives for participants that successfully  
2205 enroll other interested and eligible families, would serve as an additional strategy to assist  
2206 recruitment efforts with our hard-to-reach target populations. The maximum number of gift cards  
2207 participants will receive for this would not exceed \$100 over the course of the 3-year trial.

2208 From our GROW formative research pilot (IRB No. 100591), out of 439 parent/child dyads  
2209 assessed for eligibility, only 50 parent/child dyads were eligible and participated at baseline; a  
2210 10% return on investment. Due to the challenge of enrolling in a large, longitudinal, community-  
2211 based, prevention trial, another strategy of recruitment will include outreach to patient families  
2212 seen by either the Vanderbilt Pediatric Primary Care Clinic or surrounding community practices.  
2213 To improve efficiency in light of our restrictive eligibility criteria, we will use Vanderbilt's  
2214 StarPanel, a computerized electronic medical record database and Vanderbilt's Whiteboard, a  
2215 scheduling database, to generate lists with scheduled clinic dates of potential participants that  
2216 meet BMI, age and zip code eligibility criteria.<sup>94</sup> Specifically, clinic staff will provide a list of  
2217 participants to research staff that meet eligibility criteria which serves as a pre-screen to identify  
2218 targeted, potentially eligible, participants and invite them into the trial. With these lists, we will  
2219 also send out an invitation letter to prospective participants that includes an opportunity to opt-  
2220 out recruitment efforts whereby these families that do not wish to be called or approached in  
2221 clinic's waiting room, may contact research staff to opt out of receiving any recruitment phone  
2222 calls or being approached on-site at clinic (**see appendix D for the invitation letter and D1 for**  
2223 **invitation letter in Spanish**).

2224 The Monroe Carell Jr. Children's Hospital at Vanderbilt Division of General Pediatrics serves  
2225 families from Davidson County, caring for a panel of 15,000 patients, many of whom reside in  
2226 the zip codes of interest (refer to letter of support). Ninety percent of patients qualify for  
2227 Medicaid. Moreover, the Cumberland Pediatric Foundation, including more than 200 community  
2228 pediatricians in middle Tennessee, will refer eligible parent-child dyads to the study (refer to  
2229 letter of support). The majority of children served in these clinics are 5 years old and younger  
2230 presenting for well-child examinations. Utilizing this multi-pronged, recruitment strategy, we plan  
2231 to reach our required numbers of study participants.

2232 In addition to the recruitment process, the prescreening process has been developed to assess  
2233 major elements of eligibility criteria at all recruitment sites (**see appendix E for prescreen**  
2234 **survey (English version) and appendix F for prescreen survey (Spanish version)**).  
2235 Moreover, recruitment for a few additional sub-cohorts (i.e., ACTIVATE, or GROW Baby), will  
2236 include leveraging existing GROW trial participants, whom are eligible and interested. These  
2237 cohorts are all designed to minimize participant burden.

2238

### 2239 ***Informed Consent***

2240 For the GROW trial, informed consent will be obtained on the same day of baseline data  
2241 collection. Prior to obtaining the informed consent, adult parents and their preschool-aged child  
2242 will conduct a brief eligibility screening, specifically, re-measuring height and weight to confirm



2243 the eligibility requirement of the child's BMI (**see appendix G for script for consenting with**  
2244 **children**). If the child participant meets BMI eligibility criteria ( $\geq 50\%$  and  $<95\%$ ) then the child  
2245 will be escorted to an on-site child activity room, while the parent will be invited to initiate an  
2246 informed consent process. In order to minimize participant burden and maximize accuracy, we  
2247 may use the child's height and weight prescreening data. Consent for use of this prescreening  
2248 data will be obtained by parent as part of the consent process (*see Consent Form*).

2249 Families that do not meet the eligibility criteria will receive a small token of our appreciation of  
2250 their time and would not be eligible to participate for the specific cohort recruitment period;  
2251 however if they become eligible for future cohort recruitment periods, they could be reassessed.  
2252 Participants that do not meet eligibility criteria, data will be destroyed. During prescreen and  
2253 prior to baseline data collection, participants have the option to receive information via a variety  
2254 of mediums: phone, text or email. Text messages will be implemented by research staff  
2255 following phone call contact to remind and confirm upcoming scheduled appointments with our  
2256 hard-to-reach target participants, if they so choose.

2257 Informed consent will be obtained in a private space within a public meeting place of the  
2258 community center before the initial baseline measurements. While both parents and all in the  
2259 family are invited to attend sessions, only one adult (either mother or father) will be present for  
2260 the consenting process and enrolled in the program, since the parent or legal guardian must be  
2261 willing to commit to the 3-year study (see 11E below for eligibility criteria). During the consenting  
2262 process, the child will be escorted to the childcare room located in another room at the  
2263 community center.

2264 For all consent forms, we will ask participating adults if they would prefer to use English or  
2265 Spanish to understand their role in the research study. With their language of preference,  
2266 informed consent forms will be handed to participating adults and then read and reviewed in the  
2267 language of preference. We model our current informed consent on our recently completed  
2268 study (IRB No. 100591). We include some critical questions to ask parents to ensure they  
2269 understand the consent form before signing it. If the participant gives consent, they will sign and  
2270 date one copy of the form and keep another for their reference; both forms are also signed and  
2271 dated by the study team member obtaining the informed consent.

2272

2273 ***Inclusion Criteria:***

2274 Eligibility inclusion criteria for participation in this study are as follows:

- 2275 • Three-to-five year old children
- 2276 • English- or Spanish-speaking
- 2277 • Child's BMI  $\geq 50\%$  and  $<95\%$
- 2278 • Parental commitment to participate in a three year study
- 2279 • Consistent phone access
- 2280 • Parent age  $\geq 18$  years
- 2281 • Parents and children must be healthy (parents with controlled medical conditions will  
2282 also be eligible) as evaluated by a pre-screen (**see appendices E & F**)
- 2283 • Child completion of baseline data collection on height and weight, two diet recall  
2284 sessions, and at least 4 days of accelerometry and all willing survey items completed by  
2285 the parent
- 2286 • Racial and ethnic minority populations disproportionately at-risk for developing obesity

- 2287 • Dyad must be considered underserved which will be indicated by the parents self-  
2288 reporting if they or someone in their household participate in one of these programs or  
2289 services: TennCare, CoverKids, WIC, Food Stamps (SNAP), Free and Reduced Price  
2290 School Lunch and Breakfast, Families First (TANF), and/or subsidized housing.
- 2291 • Residence in or recruitment from one of two Nashville regions: **East Nashville/Region 1**  
2292 **(37206, 37207, 37208, 37213, 37216, 37228, 37189, 37115)**: surrounding the East  
2293 Community Center and **South Nashville/Region 2 (37013, 37204, 37210, 37211,**  
2294 **37217, 37220)**: surrounding the Coleman Recreation Center

2295 For the purposes of this study we define the participating index “parent” as the legal guardian of  
2296 the child who identifies that they spend the majority of time with that child at home. Other family  
2297 members (e.g., grandmother, uncle/aunt, etc) may be recruited and enrolled in the program only  
2298 if they have been granted legal guardianship via court order. During the consent process, legal  
2299 documentation will be requested and stored for documentation purposes.

2300 Per COPTR requirement, certain baseline data collection measures must be successfully  
2301 completed prior to randomization. Once height and weight, at least two diet recall sessions, and  
2302 at least four valid days of accelerometry from the child are completed, and all survey items  
2303 families are willing to complete have been collected, parent-child dyads will be grouped into  
2304 strata according to parent dominant language preference (English versus Spanish). After these  
2305 requirements have been successfully completed, dyads within the strata will then be  
2306 randomized to the intervention and control treatment groups.

2307 For the sub-cohort studies, informed consent will be provided at pre-existing data collection  
2308 time-points.

2309 For the GROW Baby Sub-Cohort, eligibility criteria are as follows:

- 2310 • Mothers must be enrolled in the GROW Trial, thus meeting its inclusion criteria
- 2311 • Women must report a pregnancy and have a minimum exposure of six hours to the  
2312 behavioral intervention or enrolled in the control condition for at least 6 weeks  
2313

2314

2315

2316

2317

2318

2319

2320

2321

2322

2323 For the ACTIVATE Sub-Cohort, eligibility criteria are as follows:

- 2324 • Any GROW parent participant that attend a T5 or T6 data collection time-point.  
2325

2326 **Exclusion Criteria**

2327 For the GROW trial:



- 2328 • Children who are <50% BMI or ≥ 95%
- 2329 • Children outside the specified age range
- 2330 • Families who do not speak English or Spanish
- 2331 • Lack telephone contact
- 2332 • Lack parental commitment to participate consistently for a three-year period
- 2333 • Parents and/or children who are diagnosed with medical illnesses where regular exercise might be contraindicated and are not controlled
- 2334 • Children who display dissenting behaviors during baseline data collection
- 2335 • Parents/children who do not otherwise meet the eligibility criteria listed in section above as determined by pre-screen

2338  
2339 For the GROW Baby Sub-Cohort, exclusion criteria are as follows

- 2340 • Mothers are pregnant with multiples (i.e., twins, triplets)
- 2341 • Mothers suffer a spontaneous abortion or fetal loss
- 2342 • Mothers are diagnosed as having a high risk pregnancy that cannot be managed conservatively
- 2343 • Infants will be excluded if their estimated gestational age is <36 weeks
- 2344 • Infants have a genetic or medical condition that would significantly alter infant growth (e.g., Trisomy 18)

2345  
2346  
2347  
2348  
2349  
2350  
2351

2352 Inclusion Statement: **The GROW study operationally defines participants using the**  
2353 **following inclusion criteria:**

2354  
2355 **GROW Child:** Developmentally normal three-to-five year old children with a BMI ≥ 50% and  
2356 <95%.

2357  
2358 **Adult:** Healthy adults age 18 or older and designated as the child’s parent or legal guardian.  
2359 We will also include adults that have *controlled* medical conditions given that mild-to-moderate  
2360 physical activity leads to overall well-being. The informed consent includes information on  
2361 potential risks of mild to moderate activity including a statement that encourages participants to  
2362 consult their healthcare provider if they are unsure of the safety of engaging in mild-to-moderate  
2363 physical activity. All suggested exercises will be mild and are unlikely to cause injury.

2364  
2365 **Family:** Speaks English or Spanish, resides in the defined vicinity of the intervention community  
2366 center or control library, has a commitment to the 3-year study, has phone access, and resides  
2367 in a household that participates in an assistance program for the underserved (e.g. TennCare,  
2368 WIC, SNAP, free/reduced price school lunch).

2369  
2370

2371 ***Study Procedural Overview***

2372  
2373 Figure 1: GROW Trial RCT Study Phase

GROW RCT Design

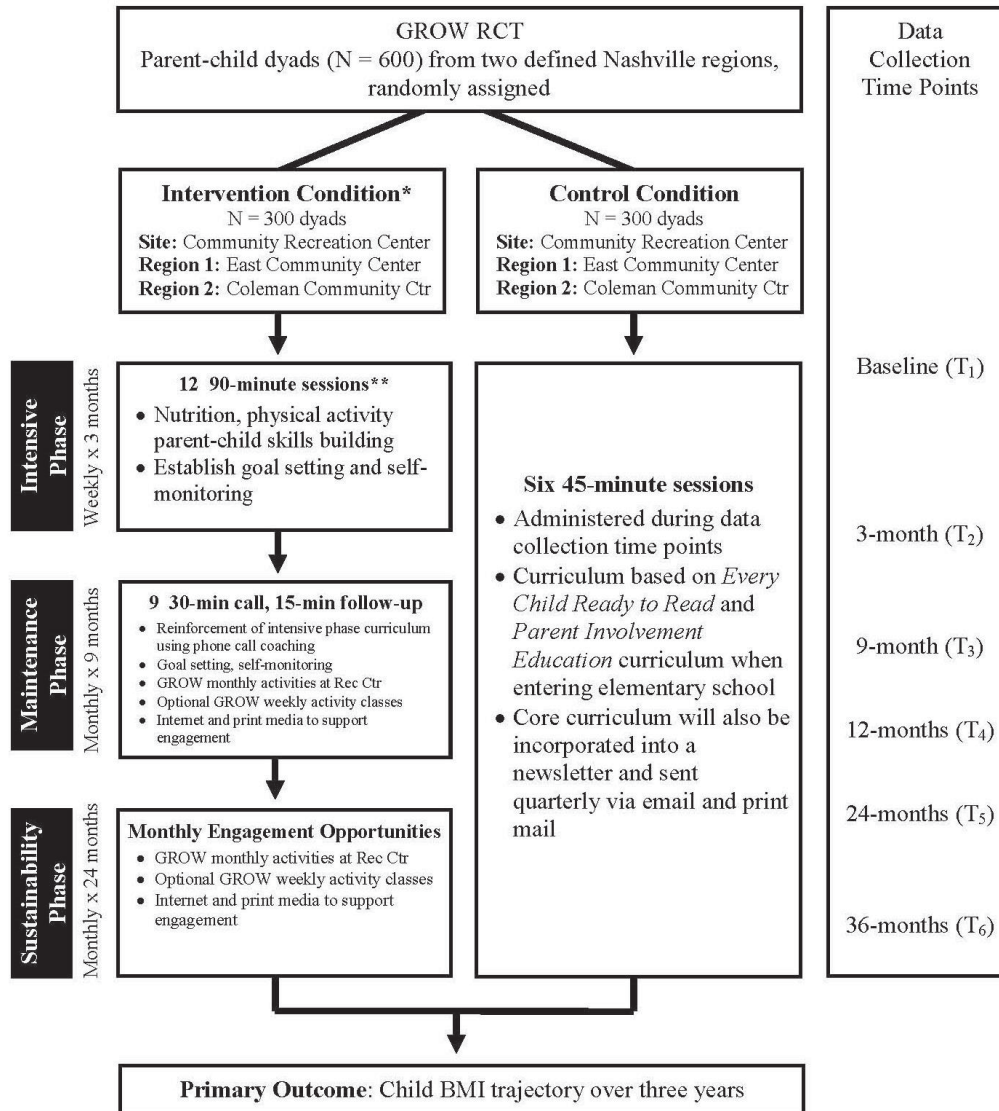

\*The intervention group will also receive control content

\*\*All intervention sessions will include a tested curriculum with groups of up to 17 dyads and will promote social network development

2374  
2375  
2376  
2377  
2378  
2379

We will conduct a rolling recruitment and enrollment for 18-months until a total of 600 parent child dyads are enrolled.

2380 **Study Treatment Groups**

2381 The intervention group will have three phases: 1) an intensive phase (weekly for 3 months) on  
2382 nutritional, physical activity and parenting skills-building via 90-min in-person sessions that  
2383 promote new social networks (see appendix O for GROW Curriculum and refer to modules  
2384 attached). One example of a module would be setting family goals around nutrition and physical  
2385 activity. We provide encouragement to utilize the built-environment for routine family physical  
2386 activity and access to healthy foods using internet/mail media, email and mail media; 2) a

2387 maintenance phase (monthly for 9 months) via 30-min phone coaching calls to reinforce  
2388 concepts from phase one (see appendix I) and a brief 15-min follow-up call one week later (see  
2389 appendix J), continued encouragement through internet and mail media, the availability of  
2390 weekly activity programming for parent-preschool child dyads through the recreation centers,  
2391 and monthly 60-minute GROW events for families to reinforce key messages; and 3) a  
2392 sustainability phase (monthly for 24 months), where there is a discontinuation of phone call  
2393 coaching and continuation of the other elements from phase two. In addition, for the intensive  
2394 phase only, families can select receiving their information via a face-to-face or coaching phone  
2395 call sessions (see intervention modules for content and scripts). These phone call sessions will  
2396 be 20 minutes in length due to the exclusion of the small group discussion, hands-on activity  
2397 with GROW child, and cooking activity, generally included in the face-to-face, in-person  
2398 sessions.

2399  
2400 The three main pillars of behavior change will be applied at each face-to-face and phone  
2401 coaching session: 1) goal setting; 2) self-monitoring to achieve those goals; and 3) problem-  
2402 solving. Additionally, after each measurement point in the intervention group, both the parent  
2403 and child participants will receive a feedback report on growth in the form of an age and gender-  
2404 appropriate BMI curve with an explanation of how their child is growing as well as their own BMI  
2405 information with an explanation.

2406  
2407 Intervention and control participants will receive a 45-minutes school readiness/school success  
2408 program during each of the 7 data collection points. Both conditions will receive a quarterly  
2409 school readiness/school success newsletter that will go out via email and snail mail over a  
2410 period of 3-years. The core curriculum will be incorporated in the newsletters and will involve  
2411 developing parental skills while also creating a practice-based learning environment for parent-  
2412 child dyads around school success utilizing key elements of Every Child Ready to Read,<sup>95</sup> a  
2413 project of the Association for Library Service to Children and the Public Library Association (see  
2414 appendix P for the Control Curriculum. As children age in the study and enter elementary  
2415 school, the control parent-child dyad will receive a curriculum that integrates core elements from  
2416 the Parent Involvement Education curriculum, tested and implemented by the Parent Institute  
2417 for Quality Education (PIQE) to improve school success.<sup>96</sup> During the beginning of the study, 1-  
2418 2 field trips will be held to expose families to local public library facilities, encouraging their use  
2419 of library resources, and introducing them to library staff. In addition to the quarterly  
2420 newsletters, control family participants will be receive a calendar of monthly library events (via  
2421 email and snail-mail) in order to continuously engage families to resources that integrate the  
2422 core curriculum into their built-environment at the public libraries.

2423  
2424 Similar to the prescreening process and for the convenience of our study participants, text  
2425 messages will be implemented by research staff to remind them of upcoming sessions and  
2426 provide them with information relevant to the study aims (i.e., promoting family-based healthy  
2427 lifestyles and/or school readiness/school success). If participants would prefer not to be  
2428 contacted via text (i.e., text message costs, unreliability, privacy concerns, etc), then we would  
2429 refrain from doing so and identify other appropriate means to contact them based on their  
2430 preference (i.e., phone calls, newsletters, face-to-face, etc). See Recruitment Eligibility Form for  
2431 questions on best way to contact families.

2432  
2433 Data collection sessions will be conducted for both treatment groups at 6-points in time (T1-T6):  
2434 baseline, 3-months, 9-months, 12-months, 24-months, 36-months, and one at 48-months. Each  
2435 of the six data collection points in this study will be conducted on-site at either community  
2436 recreational center (i.e., Coleman and East Park) with Metro Parks staff and research staff.  
2437 Metro Parks staff will not be "engaged" with research but will handle flow, childcare and check-

2438 in with participants. This data collection process will involve adult-child dyads to proceed  
2439 through a variety of stations to gather measurements and information for study analysis. In  
2440 addition, make-up data collections sessions will be available for families in all data collection  
2441 points. These will occur at a location convenient for the family that could include other  
2442 community sites, approved by the IRB for recruitment, and/or participants' homes. Additional  
2443 data collections collected yearly will be optional for existing participants (T7 & T8). Like before,  
2444 we will obtain consent prior to collecting data at these additional data collection sessions. In  
2445 addition, we will request permission to link child health data to school-related outcomes (i.e.,  
2446 attendance and test scores).

2447

#### 2448 *Social media use throughout the study for the Intervention Group*

2449 Since our targeted population are underserved families, such families have been well-known in  
2450 the literature to be hard-to reach and hard-to-keep families, especially over a 3 year period of  
2451 time. Because of this challenge, Facebook has been considered a viable tool to retain and  
2452 reach families, in addition, serve as an interactive tool to continually maintain engagement for  
2453 participants in the GROW study (see appendix H for Facebook messages). Thus, all study  
2454 participants in the intervention groups will be invited to use a social media platform (grow-  
2455 program.com). Specifically, participants will receive reminders to upcoming sessions/community  
2456 events, polls to gauge satisfaction and curriculum understanding, posts that display recipes,  
2457 pictures, and videos, and links to helpful web links for more information. In addition, participants  
2458 will be able to post comments and pictures, and potentially strengthen their social network ties  
2459 amongst themselves. Per Vanderbilt Social Media Policies, research staff will monitor content  
2460 daily to ensure appropriate discourse and interaction that uphold the standards of Vanderbilt as  
2461 an institution. For those families that do not have access to this tool, emails and/or regular mail  
2462 will be sent out monthly. See attached for our re-engagement letters (in both English and  
2463 Spanish) that will be sent to families that have been lost in the study. An additional letter (back-  
2464 up) is sent out if there remains no response from these study participants.

2465

#### 2466 *The Adaptive Intervention Design*

2467 The research team plans to utilize an adaptive intervention approach<sup>97</sup> for children who are not  
2468 responding to the intervention based on their BMI trajectories. More simply, for the purposes of  
2469 this adaptive intervention, a child will be considered a non-responder if her/his BMI weight  
2470 categorization shifts negatively from T1 to T2 (i.e., if formerly normal weight child shifts to  
2471 overweight or obese in this period of time; or if formerly overweight child shifts to obese, as  
2472 defined by BMI). Child BMI change from T1 to T2 will be reported using an easily  
2473 understandable and comprehensive growth feedback report and mailed to the parents after T2  
2474 measurements are collected. The adaptive intervention will occur at the first phone call coaching  
2475 session of the maintenance phase. The coach will review the feedback report with the parent  
2476 and solicit from the parent both the successes and barriers faced with incorporating GROW  
2477 lessons into their everyday lives (responders will also receive feedback reports but will not  
2478 receive a report explanation session discussed by a phone call coach). These adaptive  
2479 intervention report feedback sessions will occur again after BMI categorization/non-responder  
2480 status is reassessed at the T3, T4, and T5 data collection time points.

2481

#### 2482 *The Pregnancy Sub-Cohort (GROW Baby)*

2483 The research team will develop a prospective cohort of women who become pregnant during  
2484 this ongoing GROW behavioral intervention, designed to prevent childhood obesity in minority  
2485 and underserved families. During the trial, if any mother reports a pregnancy, we will invite them  
2486 to participate in this new cohort. In order to determine how maternal prepregnancy BMI,  
2487 maternal gestational weight gain, and early infant feeding practices interact to shape infant  
2488 growth trajectory in the first six months of life, this research team will obtain 1) data on feeding

2489 practices between 3-4 months of child's life via a phone call survey; and 2) data from chart  
2490 reviews (OB records and pediatric records), using previously validated abstraction forms for  
2491 both pregnancy characteristics and infant growth. The phone call survey has 24 items and will  
2492 take approximately 10-15 minutes to complete. Medical records will be obtained from OB/GYN  
2493 offices, pediatrician offices, and hospital delivery records. Mothers will sign a release of medical  
2494 information for relevant charts, which will be facilitated through the Vanderbilt Clinical Trials  
2495 Center. These data will be compared to other baseline demographics, maternal co-variables of  
2496 interest and pre-pregnancy anthropometrics (see Pregnancy Cohort Data below for details on  
2497 data sources). The development of this type of cohort will provide an opportunity to combine  
2498 research-quality anthropometrics and co-variables, already being prospectively collected with  
2499 additional patient-reported outcomes and anthropometric measurements, in a natural  
2500 experiment to address important questions about pregnancy health and pediatric obesity  
2501 prevention in the early stages of life.

2502  
2503  
2504  
2505  
2506  
2507  
2508  
2509  
2510  
2511  
2512  
2513  
2514  
2515  
2516  
2517  
2518  
2519  
2520  
2521  
2522  
2523  
2524  
2525  
2526  
2527  
2528  
2529  
2530  
2531  
2532  
2533  
2534  
2535  
2536  
2537  
2538  
2539



2540 *The Social Network (ACTIVATE) Sub-Cohort*

2541 During T5 and T6 data collection, the GROW Trial has already been approved by Vanderbilt's  
2542 IRB to administer the Social Network Survey (see appendix L) that will ask participants to name  
2543 up to seven GROW study participants that they consider friends (friendship network). Since all  
2544 participants will be asked the same questions, a mapping of the social network will emerge in  
2545 the data. From these data we will also be able to weight ties according to strength of friendship  
2546 or frequency of communication. Subsequently, in addition to the Social Network Survey, all  
2547 families that attend T5 and T6 data collection will be invited to participate in an additional survey  
2548 entitled the Patient Activation Measure (PAM), see measures section below for more details.  
2549 The PAM survey, a previously validated measure,<sup>98</sup> is designed to elicit individual's knowledge,  
2550 attitudes, skills and confidence in self-managing health. Higher PAM scores suggest that  
2551 individuals are more likely to understand that their active involvement is critical to their health.  
2552 Data from both surveys will help determine if obesity-related behaviors (i.e., physical activity,  
2553 willingness to actively manage one's own health, weight loss) can spread through new social  
2554 relationships. Prior to administering the PAM survey, informed consent will be obtained for all  
2555 interested participants (see attached consent form lead by Dr. Sabina Gesell from Wake  
2556 Forest). Families that agree to consent will then be enrolled in this ACTIVATE sub-cohort.

2557

2558

2559

2560

2561

2562

2563

2564

2565

2566

2567

2568 ***Outcome Measures & Procedures***

2569

2570

2571 In addition to BMI as the primary outcome variable, we have seven *a priori* secondary outcome  
2572 variables, which were specified after the study began, but before the non-baseline data were unblinded  
2573 by arm. Four are related to diet: average daily energy intake (kcal), percentage of energy intake from  
2574 fat, carbohydrates, and protein. Two are related to physical activity: average daily time (minutes) spent  
2575 in rest and sedentary behavior, and moderate and vigorous physical activity. The seventh variable is  
2576 parent community center use with child (never versus at least once).

2577

2578

2579 ***Process Measures***

2580 The GROW trial process measures will include: participation rates collected via attendance logs;  
2581 data collection process collected via timed logs and identification of any issues that arise during  
2582 the data collection procedures; retention barriers and facilitators via call logs conducted by the

2583

2584

2585

2586

2587

2588

2589

2590



2591 study team; session fidelity checks to ensure consistency and accuracy of content  
 2592 administration; logs to assess use of recreation center and library outside of mandatory GROW-  
 2593 related sessions; Metro Parks and Recreation facility staff satisfaction surveys to assess  
 2594 barriers and facilitators of conducting the research program within their facility; library facility  
 2595 staff satisfaction surveys to assess barriers and facilitators of conducting the research program  
 2596 within their facility; and parent-child satisfaction with study participation. The GROW Trial will  
 2597 also administer a brief survey to intervention participants to identify participants' preferences on  
 2598 the types of programming delivered by community recreational centers to encourage and  
 2599 sustain use of their built environment for physical activity (See Appendix S for survey).  
 2600

2601 *Collection of Moderators & Mediators*

2602 Conceptually, moderators identify on whom and under what circumstances the study treatment  
 2603 have different effects. In contrast, mediators identify why and how the treatment works or  
 2604 doesn't work. Below is a table including all moderators and mediators identified for this study,  
 2605 the measurement tool, a brief description, the intended respondent, method and time point of  
 2606 data collection. **See Table 1: Collection of Moderators & Mediators below for details.**

2607 Note: Computerized surveys are electronic surveys from the REDCap Database that will be  
 2608 administered and completed at the community center; no procedures will be conducted at  
 2609 Vanderbilt nor at home. Once entered and saved, the data will be housed on a Vanderbilt  
 2610 server. REDCap provides the ability to enter measurement data, including basic mathematic  
 2611 and logic checks for verifying valid data, as well as survey data. The research staff will utilize a  
 2612 combination of the wireless internet at the community center and mobile hotspots to provide  
 2613 internet access for all computers used.

2614 Table 1: Collection of Moderators & Mediators

| Domain            | Measurement Tool                                                 | Description                                              | Respondent [Parent (P) or Child (C)] | Method                                                    | Collection Time                                                                    | Site-Specific ? |
|-------------------|------------------------------------------------------------------|----------------------------------------------------------|--------------------------------------|-----------------------------------------------------------|------------------------------------------------------------------------------------|-----------------|
| Physical Activity | Accelerometer (GT3X+)                                            | Sedentary activity (% sedentary mins/total wearing time) | P, C                                 | Parent and child accelerometer wear (≥4 days, ≥6 hrs/day) | T <sub>1</sub> , T <sub>4</sub> , T <sub>5</sub> , T <sub>6</sub>                  | No              |
|                   | GROW developed survey questions related to intervention messages | Self-reported physical activity habits                   | P                                    | Computerized Survey (3Q)                                  | T <sub>1</sub> , T <sub>2</sub> , T <sub>4</sub> , T <sub>5</sub> , T <sub>6</sub> | Yes             |

|                            |                                                                  |                                                                                                          |   |                                                     |                                                                                    |     |
|----------------------------|------------------------------------------------------------------|----------------------------------------------------------------------------------------------------------|---|-----------------------------------------------------|------------------------------------------------------------------------------------|-----|
| <b>Nutrition</b>           | Diet Recall (child only)                                         | Total calories and macronutrient content (% fat, protein, carbohydrate) adherent to USDA recommendations | P | 3-day child diet recall (parental report for child) | T <sub>1</sub> , T <sub>4</sub> , T <sub>5</sub> , T <sub>6</sub>                  | Yes |
|                            | Survey Item                                                      |                                                                                                          |   |                                                     |                                                                                    | No  |
|                            | GROW developed survey questions related to intervention messages | Parent and child eating and feeding habits                                                               | P | Computerized Survey (9Q)                            | T <sub>1</sub> , T <sub>2</sub> , T <sub>4</sub> , T <sub>5</sub> , T <sub>6</sub> | Yes |
| <b>Social Network</b>      | GROW developed Social Network Survey                             | Assessing social networking and its influence on behavior modification                                   | P | Computerized Survey (11Q)                           | T <sub>1</sub> , T <sub>2</sub> , T <sub>4</sub> , T <sub>6</sub>                  | Yes |
|                            | Bollen & Hoyle Perceived Cohesion Scale                          | Assessing group cohesion                                                                                 | P | Computerized Survey (6Q)                            | T <sub>Week 3</sub> , T <sub>Week 6</sub> , T <sub>2</sub>                         | Yes |
|                            | GROW developed Advice Scale                                      | Assessing information sharing                                                                            | P | Computerized Survey (2Q)                            | T <sub>Week 3</sub> , T <sub>Week 6</sub> , T <sub>2</sub>                         | Yes |
| <b>Parenting Practices</b> | Toddler Feeding Questionnaire (TFQ)                              | Parenting approaches to child feeding                                                                    | P | Computerized Survey (34Q)                           | T <sub>1</sub> , T <sub>2</sub> , T <sub>4</sub> , T <sub>5</sub> , T <sub>6</sub> | Yes |
| <b>Eating Behaviors</b>    | HHHK - Eating Behaviors subscale                                 | How often meals are eaten together                                                                       | P | Computerized Survey (3Q)                            | T <sub>1</sub> , T <sub>2</sub> , T <sub>4</sub> , T <sub>5</sub> , T <sub>6</sub> | No  |
|                            | GROW developed survey questions related to intervention messages | Where meals are eaten together                                                                           | P | Computerized Survey (4Q)                            | T <sub>1</sub> , T <sub>2</sub> , T <sub>4</sub> , T <sub>5</sub> , T <sub>6</sub> | Yes |
|                            | Brief Motivational Interviewing (BMI)                            | Child and adult eating out                                                                               | P | Computerized Survey (8Q)                            | T <sub>1</sub> , T <sub>2</sub> , T <sub>4</sub> , T <sub>5</sub> , T <sub>6</sub> | Yes |
| <b>Sleep</b>               | GROW developed survey questions related to intervention messages | Parent and child sleeping habits                                                                         | P | Computerized Survey (6Q)*                           | T <sub>1</sub> , T <sub>2</sub> , T <sub>4</sub> , T <sub>5</sub> , T <sub>6</sub> | Yes |

|                                            |                                                                           |                                                                             |      |                                |                                                                                    |     |
|--------------------------------------------|---------------------------------------------------------------------------|-----------------------------------------------------------------------------|------|--------------------------------|------------------------------------------------------------------------------------|-----|
| <b>Media Use</b>                           | Stanford (GEMS/ECHALE) developed questions                                | Media available in household                                                | P    | Computerized Survey (3Q)       | T <sub>1</sub> , T <sub>2</sub> , T <sub>4</sub> , T <sub>5</sub> , T <sub>6</sub> | No  |
|                                            | YRBS subscale                                                             | Child's media use                                                           | P    | Computerized Survey (3Q)       | T <sub>1</sub> , T <sub>2</sub> , T <sub>4</sub> , T <sub>5</sub> , T <sub>6</sub> | No  |
| <b>Use of Rec Center</b>                   | GROW developed survey questions related to intervention messages          | Parent and child knowledge and use of rec center outside of GROW activities | P    | Computerized Survey (3Q)       | T <sub>1</sub> , T <sub>2</sub> , T <sub>4</sub> , T <sub>5</sub> , T <sub>6</sub> | Yes |
| <b>Use of Library</b>                      | GROW developed survey questions related to intervention messages          | Parent and child knowledge and use of libraries outside of GROW activities  | P    | Computerized Survey (9Q)       | T <sub>1</sub> , T <sub>2</sub> , T <sub>4</sub> , T <sub>5</sub> , T <sub>6</sub> | Yes |
| <b>Perception of the Built Environment</b> | Participant Physical Activity and Neighborhood Supports Survey            | Parent knowledge of the resources in the built environment                  | P    | Computerized Survey (57Q)      | T <sub>1</sub> , T <sub>4</sub> , T <sub>5</sub> , T <sub>6</sub>                  | Yes |
| <b>Stress</b>                              | Cohen's Perceived Stress Scale (PSS)                                      | Assesses current levels of parental stress                                  | P    | Computerized Survey (10Q)      | T <sub>1</sub> , T <sub>2</sub> , T <sub>4</sub> , T <sub>5</sub> , T <sub>6</sub> | Yes |
| <b>Depression</b>                          | Center for Epidemiological Studies-Depression Scale (CES-D)               | Assesses levels of parental depression                                      | P    | Computerized Survey (21Q)      | T <sub>1</sub> , T <sub>2</sub> , T <sub>4</sub> , T <sub>5</sub> , T <sub>6</sub> | Yes |
| <b>Goal Setting and Monitoring</b>         | GROW developed survey questions related to intervention messages          | Ability to set and track goals                                              | P    | Computerized Survey (6Q)       | T <sub>1</sub> , T <sub>2</sub> , T <sub>4</sub> , T <sub>5</sub> , T <sub>6</sub> | Yes |
| <b>Executive Functioning</b>               | Stephanie Carlson's Executive Function Scale for Preschoolers             | Comprehensive executive functioning measure                                 | C*** | Hands-on Tasks (about 10 mins) | T <sub>1</sub> , T <sub>5</sub>                                                    | Yes |
| <b>Weight Perception</b>                   | COPTR common survey questions                                             | Current perception of parent's and child's weight                           | P    | Computerized Survey (2Q)       | T <sub>1</sub> , T <sub>2</sub> , T <sub>4</sub> , T <sub>5</sub> , T <sub>6</sub> | No  |
| <b>Self-Efficacy</b>                       | Parenting Sense of Competence (PSOC) and Perceived Competence Scale (PSC) | Confidence around parenting decisions                                       | P    | Computerized Survey (13Q)      | T <sub>1</sub> , T <sub>2</sub> , T <sub>4</sub> , T <sub>5</sub> , T <sub>6</sub> | Yes |
| <b>Readiness to Change</b>                 | Brief Motivational                                                        | Assesses parent's                                                           | P    | Computerized Survey (6Q)       | T <sub>1</sub> , T <sub>2</sub> , T <sub>4</sub> , T <sub>5</sub> , T <sub>6</sub> | Yes |

|                                |                                                                   |                                                                     |      |                                                    |                                                                                    |      |
|--------------------------------|-------------------------------------------------------------------|---------------------------------------------------------------------|------|----------------------------------------------------|------------------------------------------------------------------------------------|------|
|                                | Interviewing (BMI)                                                | readiness to change around healthy eating and physical activity     |      |                                                    |                                                                                    |      |
| <b>Child Asthma/ Allergies</b> | GROW developed survey questions                                   | Child asthma history and allergies                                  | P    | Computerized Survey (2Q)                           | T <sub>1</sub> , T <sub>2</sub> , T <sub>4</sub> , T <sub>5</sub> , T <sub>6</sub> | Yes  |
| <b>Well-Being</b>              | SF-12                                                             | Adult general well-being                                            | P    | Computerized Survey (1Q)                           | T <sub>1</sub> , T <sub>2</sub> , T <sub>4</sub> , T <sub>5</sub> , T <sub>6</sub> | Yes  |
| <b>Smoking</b>                 | NHANES 2011-2012                                                  | Adult Smoking Practices                                             | P    | Computerized Survey (1Q)                           | T <sub>1</sub> , T <sub>2</sub> , T <sub>4</sub> , T <sub>5</sub> , T <sub>6</sub> | Yes  |
| <b>Child Healthcare</b>        | GROW developed survey questions                                   | Child health insurance and healthcare visits                        | P    | Computerized Survey (4Q)                           | T <sub>1</sub> , T <sub>2</sub> , T <sub>4</sub> , T <sub>5</sub> , T <sub>6</sub> | Yes  |
| <b>Demographics</b>            | Demographic questions                                             | Common and site-specific demographic questions                      | P    | Computerized Survey (15Q Common; 6Q Site-specific) | T <sub>1</sub>                                                                     | No** |
| <b>Genotype</b>                | Oragene kit (adult), baby brush (child)                           | Genetic risk score                                                  | P, C | Genotyping saliva                                  | T <sub>1</sub> , T <sub>6</sub>                                                    | No   |
| <b>Family Health History</b>   | Brief Motivational Interviewing                                   | Known family health problems                                        | P    | Computerized Survey (5Q)                           | T <sub>1</sub>                                                                     | Yes  |
| <b>Perinatal Health</b>        | Updated questions from KA Dept of Health WIC intake               | Maternal gestational health, birth weight, and breastfeeding habits | P    | Computerized Survey (7Q)                           | T <sub>1</sub>                                                                     | No** |
| <b>Health Literacy</b>         | The Newest Vital Sign (NVS)                                       | Understanding food label information                                | P    | Computerized Survey (5Q)                           | T <sub>1</sub>                                                                     | Yes  |
| <b>Food Security</b>           | USDA 2008 subscale                                                | Financial barriers affecting availability of food in the home       | P    | Computerized Survey (7Q)                           | T <sub>1</sub> , T <sub>5</sub> , T <sub>6</sub>                                   | No   |
| <b>Intelligence</b>            | Woodcock-Johnson III Tests of Cognitive Abilities – Brief Battery | Standard intelligence measurement                                   | C*** | Three 5-10 minute hands-on subtests                | T <sub>1</sub>                                                                     | Yes  |

Q = Survey Questions

\* Some accelerometry data will be used to assess sleeping behaviors.

\*\*Some site-specific questions have been added in addition to the common questions in these areas.

\*\*\*Executive functioning and intelligence will be administered to children who are 4 and 5 years old at baseline.

2616 **Description of Measures**

2617

2618 **Anthropometric Measurements**

2619 Body weight for each subject will be measured, after voiding and wearing light clothing, to the  
2620 nearest 100 g on a calibrated digital scale. Body height without shoes will be measured to the  
2621 nearest 0.1 cm with a stadiometer. BMI will be calculated (weight [kg]/height [m<sup>2</sup>]), using the  
2622 standard CDC calculator. Both height and weight measures will be collected twice. The mean of  
2623 the two closest measures is used as a final measurement. Children will be wearing light clothes  
2624 and without shoes. Height without shoes will be measured to the nearest 0.1 cm using our  
2625 standard stadiometer (Perspective Enterprises, Portage, MI). Adult and child waist  
2626 circumference will be measured with a fiberglass measuring tape on the skin, at the umbilicus,  
2627 to the nearest 0.1 cm, according to the recommendations of the World Heart Federation.<sup>99</sup> Waist  
2628 circumference will be collected two times, if the two measurements of waist differ by 1 cm or  
2629 more, then the waist measurements are repeated a third time and data entered. The mean of  
2630 the two closest measures is used as a final measurement. Measurements will be obtained by  
2631 trained project staff and standardized according to accepted standards.<sup>100-102</sup>

2632

2633 **Triceps Skinfolts**

2634 Triceps skinfold thickness is a measure of subcutaneous fat and is a component of equations  
2635 used to predict body fat composition.<sup>103</sup> SFs have been used successfully in studies with adults  
2636 and children,<sup>104-106</sup> including young children from 3 to 8 years of age.<sup>107,108</sup> Recent literature  
2637 suggests that SFs are more accurate in estimating body composition compared to bioelectrical  
2638 impedance (BIA) during the adiposity rebound, the normal pattern of growth that occurs in all  
2639 children growing between 3 to 5 years of age.<sup>107</sup> SF is measured using a Lange skinfold caliper  
2640 in the midline of the posterior aspect (back) of the arm, over the triceps muscle, at a point  
2641 midway between the lateral project of the acromion process of the scapula (shoulder blade) and  
2642 the inferior margin (bottom) of the olecranon process of the ulna (elbow). They are measured to  
2643 the nearest 0.1 mm and collected two times. A third SF measurement is taken if either of the  
2644 following occur: 1) If the two triceps values are less than 10mm but differ by 2 mm or more; or 2)  
2645 If the skinfold is 10mm or larger, with a difference between the two measurements of greater  
2646 than 10% (((maximum-minimum)/minimum)\*100). In either case, the mean of the two closest  
2647 measures is used as the final measurement. In order to accommodate participants that are  
2648 morbidly obese participants then we will use the Harpenden calipers. Training, certification and  
2649 quality control procedures for SFs are similar to those outlined above for waist circumference  
2650 and other anthropometrics.

2651

2652 **Accelerometers**

2653 Amount of physical activity will be assessed using the ActiGraph GT3M (Actigraph LLC, Ford  
2654 Walton, FL) accelerometer. Accelerometry had been used successfully in studies with adults  
2655 and children<sup>109-113</sup> with a reliability:  $r = 0.93$ <sup>114</sup>. Both a parent and a child will be asked to wear  
2656 the monitor for one week during waking and sleeping hours except when bathing, showering, or  
2657 swimming. A simple 1-page manual (in Spanish and English) will be provided. The monitor will  
2658 be attached to a belt secured at the waist. The monitors will be sent by mail in pre-addressed  
2659 and pre-stamped boxes to the Energy Balance Laboratory at Vanderbilt. We have used this  
2660 technique very successfully in similar studies with children and their families. The activity data  
2661 will be downloaded to a computer and analyzed. Physical activity will be expressed as activity

2662 counts per day. Total and physical activity energy expenditure (kcal/day) will be calculated using  
2663 validated equations.<sup>114,115</sup> Threshold values from a validation study will be used to calculate time  
2664 spent in sedentary, light, moderate, and vigorous activity. Accelerometer use will be  
2665 supplemented with a short physical activity log that collects physical activities and time of  
2666 accelerometer use (hours/day).  
2667

### 2668 **Energy Intake**

2669 We will obtain detailed data on foods and nutrients associated with energy balance and weight  
2670 management from total dietary intakes (foods, beverages and snacks): energy intakes, energy  
2671 density, macronutrient intakes, added sugars, as well as consumption of specific foods and food  
2672 groups that are excessively high (Sugary Sweetened Beverages, desserts) or inadequate (fruits,  
2673 vegetables, milk and dairy products, whole grains and fiber) in the typical diets of U.S. children.  
2674 It is understood that accurate assessment of dietary intakes of free-living individuals is a  
2675 challenging process and there is no single method that is without limitations. To optimize the  
2676 accuracy of the assessment of dietary intake data, we will conduct 24-hour dietary recalls using  
2677 the USDA multi-pass method administered by trained diet recall technicians. Recalls will be  
2678 performed to capture the average of dietary intakes from 2 nonconsecutive week days and 1  
2679 weekend day during the 14-day period of each main study time-point. Diet recall will occur via  
2680 three phone sessions conducted by the two master trainers at the University of North Carolina  
2681 (UNC) at Chapel Hill over a maximum of a 30-day period to collect complete participant  
2682 information. All master trainers will participate in a central in-person training organized by the  
2683 Research Coordinating Unit (RCU) located at UNC. No diet recalls will be conducted until after  
2684 the trainer has been trained and certified. Parents will report on themselves and on their child.  
2685 Analyses will not include data that indicates unrealistically low (eg, <600kcal/d) or high intakes  
2686 (eg, >4000kcal/d). Dietary data will be entered and analyzed using our NDS-R software  
2687 (Nutrient Data System for Research, St. Paul, MN). Added sugars will be calculated using the  
2688 USDA database <http://www.ars.usda.gov/Services/docs.htm?docid=12107>z

2689

### 2690 **Study Questionnaire**

2691 The study questionnaire will measure a variety of domains and will be provided in both English  
2692 and Spanish (**see appendix K for survey**). It will be a computer-administered questionnaire  
2693 completed by parents with paper and pencil questionnaire as back-up. **See Table 1: Collection**  
2694 **of Moderators & Mediators for details**. Survey takes about 30-45 minutes to complete.

### 2695 **Metro Parks Staff Questionnaire on Preschool Programs**

2696 This survey will assess programs that promote healthy lifestyle activities for both English and  
2697 Spanish speaking families with preschool age children (3-5 years) in the 22 Nashville  
2698 Metropolitan Community Recreation Centers. Healthy lifestyle programming includes programs  
2699 or events that encourage good nutrition and/or physical activity. In addition to healthy program  
2700 availability, this survey will assess the presence of teaching kitchens in each facility, whereby  
2701 instructors lead sessions to teach families how to prepare healthy and affordable meals.  
2702 Participants for this survey are the 22 facility coordinators at each recreation center. The survey  
2703 will be administered annually online through email via REDCap and is expected to take 10-15  
2704 minutes to complete. Since all 22 facility coordinator's (directors) emails are publicly available,  
2705 we will actively recruit these metro parks staff via email and include a script consenting for their  
2706 participation to this online survey (**see appendix R for script**). Results of this survey aim to



2707 describe the presence and frequency over time of healthy lifestyle programs specifically  
2708 dedicated to parents and their children at each community center (*see appendix Q*). A waiver  
2709 of consent documentation form (Form #1112) has been completed for the Metro Parks staff who  
2710 will be consented only before they complete the survey.

### 2711 **Social Networks**

2712 We will collect social network data, exploring the potential development of new social ties that  
2713 could result due to the structure of the study (*see appendix L*).  
2714

### 2715 **Patient Activation Survey**

2716 The Patient Activation Measure (PAM) Survey will also be used to determine if obesity-related  
2717 behaviors (i.e., physical activity, willingness to actively manage one's own health, weight loss)  
2718 can spread through new social relationships (see attached for survey). The Patient Activation  
2719 Measure (PAM) is a 13-item measure that assesses patient knowledge, skill, and confidence for  
2720 self-management.<sup>98</sup> The measure was developed using the Rasch analyses and is an interval  
2721 level, unidimensional, Guttman-like measure. Reliability and validity was assessed by Hibbard  
2722 et al., with the 13-item measure. Psychometric properties included scores from 38.6 to 53.0.<sup>98</sup>  
2723 This survey takes about 5-10 minutes to complete and will be administered at T5, and T6 data  
2724 collection sessions. Prior to administering this survey, an additional informed consent form will  
2725 be obtained.

### 2726 **Genetics/Epigenetics**

2727 Saliva will be collected from the parent-child dyad participating in the study<sup>116</sup>. For adults, saliva  
2728 will be obtained utilizing the Oragene saliva kit, collecting 2-3 cc of saliva per participant. For  
2729 young children, saliva will be obtained utilizing the "baby brush" approach, in which small  
2730 sponges attached to plastic handles are inserted between cheek and gumline to absorb saliva.  
2731 Subsequently, the sponges (x4) are cut and placed in the spittoon with DNA preservation  
2732 solution. We will then use a modification of the Puregene DNA (Gentra, Inc) Purification  
2733 Protocol for 4 ml Saliva Samples<sup>116</sup>, consisting of 4 stages: (1) cell lysis and addition of RNase  
2734 to remove RNA from the salivary nucleic acid; (2) DNA precipitation in 100% isopropanol, with  
2735 70% ethanol wash; (3) DNA hydration in reduced TE (Tris EDTA) to approximate concentration  
2736 of 200 ng/u; (4) DNA storage at 4C for working stock, and -80C for archival DNA samples.  
2737

### 2738 **Pregnancy Sub-Cohort (GROW Baby)**

2739 These data will be collected in two forms: 1) a phone survey; and 2) data from chart reviews,  
2740 using previously validated abstraction forms for both pregnancy characteristics and infant  
2741 growth. The phone survey will include questions related to maternal feeding practices between  
2742 the child's third and fourth month of life. We will use the Vanderbilt Survey Research Core to  
2743 administer the survey via phone. The survey will consist of 24 items and will assess both  
2744 parental beliefs and practices about feeding in the first six months of life (see survey attached).  
2745 The survey will be administered when the child is between 3-4 months of age to identify feeding  
2746 practices when rapid weight gain can be most detrimental and to minimize recall bias. Because  
2747 it is a mediator and not a primary outcome, we will only conduct the survey at one point in time  
2748 to minimize participant burden. This phone survey will take approximately 10-15 minutes to  
2749 complete.

2750 To obtain chart reviews and records, research staff will request medical records via secure fax  
2751 from prenatal care, hospital delivery, and nursery records. All chart abstractors will be blinded to  
2752 study condition (i.e., intervention or control group). A chart abstraction methodology has  
2753 previously been developed to calculate maternal gestational weight gain. We will abstract data  
2754 from obstetrical records to obtain at least three additional pregnancy weights, allowing us to use  
2755 a slope-as-outcome approach, maximizing our power to detect a clinically meaningful  
2756 difference. Specifically, we will obtain information on height, weight, any medical conditions, and  
2757 medications they may have taken while pregnant, all of which are typically available in their  
2758 existing medical record. To evaluate rapid infant weight gain, we will obtain medical records  
2759 from the hospital delivery records for birth weight and from pediatricians' offices for height and  
2760 weight measurements through the infants first six months of life.

2761

2762

2763

2764

2765

### 2766 **Family Functioning**

2767 Family functioning will be assessed by collecting both: 1) the Family Adaptability and Cohesion  
2768 Evaluation Scale (FACES IV), and 2) household social network relationships. The FACES IV is  
2769 a 62 item scale that assesses family cohesion and flexibility dimensions, family satisfaction and  
2770 family communication styles. There is significant support for the reliability and validity of the  
2771 scale and it has been used to assess family functioning in almost 500 published studies.  
2772 Coefficient alphas for all scales range from .77 to .89, with the cohesion and flexibility scales  
2773 being .89 and .84.<sup>61,117,118</sup> The two balanced scales, cohesion (7 items) and flexibility (7 items)  
2774 assess the emotional bonding between family members and the quality and expression of family  
2775 roles and organization, respectively.<sup>61</sup> The additional 4 unbalanced scales assess high and low  
2776 extremes of family cohesion (disengaged and enmeshment) and flexibility (rigid and chaotic).  
2777 Respondents are asked to respond to each question on a 5- point Likert scale ranging from (1)  
2778 strongly disagree to (5) strongly agree. The FACES IV scale has been translated into Spanish  
2779 and found to be reliable and valid in Spanish speaking populations.<sup>119</sup> The FACES IV will be  
2780 completed by all consenting household members.

2781

### 2782 **Household Social Network Relationships**

2783 Social ties between the GROW parent-child pair, and other participating household family  
2784 members will be operationalized as multiple relationships (e.g. familial, friendship, cohabitation).  
2785 Size and composition of family network will be assessed. The strength of the relationship ties  
2786 will be determined through the FACES IV scales described above. Family Environmental  
2787 Factors are collected via survey that is delivered in the parent's language of choice verbally (to  
2788 account for low literacy populations) and directly entered a REDCap survey data base.  
2789 Additional data that will be utilized to characterize family environment and are already collected  
2790 as part of the GROW trial.

2791

### 2792 **Qualitative Semi-Structured Interviews**

2793 At the study's final data collection, we will conduct a 30-45 minutes semi-structured interview  
2794 with GROW intervention families to identify how specific behavioral intervention strategies led to

2795 changes in family environment and young siblings' health behaviors (see attached). Our initial  
2796 sample will include 50 families. Should we fail to reach theme saturation with this sample, we  
2797 will conduct additional interviews until no new themes emerge. Research assistants will be  
2798 trained to code on the three initial transcripts, and certified to work once they meet criteria for  
2799 reliable and valid use of the coding system. Twenty-five percent of the transcripts will be coded  
2800 twice, with coders kept blind to which transcripts are being used to assess reliability. Coding  
2801 discrepancies will be reviewed by the coding team, and feedback used to improve the use of the  
2802 coding system. Interviews conducted in Spanish will be translated and transcribed into English.  
2803 Interviewers will also collect field notes during the interviews.

2804

#### 2805 Barriers to Physical Activity Questionnaire

2806 This study survey is based from the *Environmental Supports for Physical Activity*  
2807 *Questionnaire*<sup>120</sup> to assess individual perceptions of physical activity supports in the social and  
2808 physical environment, use of the built environment, current physical activity behavior and  
2809 recreation center use. This survey will take about 15-20 minutes to complete and has been  
2810 validated in previous literature.<sup>121</sup> These data will help describe the policy environment of study  
2811 participants and identify policies that enable or constrain active living for participants. The  
2812 objective of this survey is to link current behavior with local community policies. Specifically, to  
2813 determine specific neighborhood characteristics that enable or constrain participant ability to be  
2814 physically active, match participant responses to one of the three policy types: personal safety,  
2815 transportation, and land use, describe local and state policies that address participant  
2816 responses, and identify untapped policy options for improving physical activity levels in  
2817 participant communities. **Geographical Information Systems (GIS):** Using data obtained from  
2818 external public sources, e.g. data from the Metropolitan Planning Department, the research  
2819 team will track and map six key measures of active living over the course of the study, such as  
2820 the ratio of sidewalks to road mileage. These data will be compared to the subjective survey  
2821 data (i.e., Barriers to Physical Activity Questionnaire – see above) obtained from  
2822 participants. GIS spatial analysis will use participant addresses to determine correlations  
2823 between proximity to specific features of the built environment (i.e., data from Metro Planning  
2824 Dept) and participant data of their perceived built environment (i.e., Barriers to Physical Activity  
2825 Questionnaire). In addition, these data will also be correlated with local policies (i.e., external  
2826 data) that support activity living and recreational use and tracked over the duration of the study.

2827 A research team member will conduct an environmental audit of those geo-coded regions from  
2828 where most of the study participants derive. This will include: 1) block audits where a study  
2829 team member verifies the existence of built environment elements such as grocery stores, fast  
2830 food establishments, and corner stores; and 2) utilization of the Nutrition Environment Measures  
2831 Survey in Stores (NEM-S) to assess the availability and affordability of food/drink in food stores.  
2832 Similar to tracking key measures of active living, GIS spatial analysis will use participant  
2833 addresses to determine correlations between proximity to specific features of the food built  
2834 environment (i.e., environmental audit) and participant data of their perceived food built  
2835 environment (i.e., NEM-S). In addition, these data will be correlated with local policies that  
2836 support healthy availability and affordability of food, and tracked over the duration of the study.

2837

#### 2838 Control Measures

2839 The study will use Stephanie Carlson's Executive Function Scale for Preschoolers to determine  
2840 a comprehensive measure of executive functioning in the child participants of the study. The

2841 battery of hands-on tasks (e.g. card sorting) will be administered by a trained data collector one-  
2842 on-one to each child and is estimated to take approximately 10 minutes. To measure  
2843 intelligence of the child participants, the research team will use the Woodcock-Johnson III Tests  
2844 of Cognitive Abilities – Brief Battery. This tool involves a battery of tasks where children  
2845 expressively (verbally and/or through pointing) respond to an assortment of pictures and words  
2846 in a flipbook. Trained data collectors will administer this test individually with each child. The  
2847 brief battery is estimated to take between 15 and 20 minutes to administer.  
2848

2849

2850

2851 **Incentives**

2852

2853 **Data Collection Incentives**

2854 After each data collection session, participating families will receive gift cards of varying  
2855 amounts throughout the duration of the 3-year trial. At times 1, 2, and 4 participants will receive  
2856 \$40. At time point 5, participants will receive \$50. Also at baseline data collection, families will  
2857 receive a small token of appreciation (value of < \$10). At time point 3, participants will receive  
2858 \$15 gift card. On the final data collection time (T6), participants will receive \$100. For those  
2859 participants that participate in an additional data collection, one year later (T7), participants will  
2860 receive a \$20 gift card. See Table 2 below for more details.

2861

2862 In order to maintain the integrity of the research, Quality Control (QC) measures will be  
2863 conducted to ensure the accuracy of data collection. Specifically, research staff will be trained to  
2864 incorporate one or more secondary measures (i.e., repeat the anthropometric measurements)  
2865 that can be used to verify the quality of information being collected from the participant. For this  
2866 trial, QC measures will be collected with random participants at all data collection points.  
2867 However, due to the additional time and participant burden of these QC checks, an additional  
2868 \$10 gift card will be given to participants (i.e., one per parent and child dyad) to compensate for  
2869 their time. All QC checks will be conducted by a certified Master Data Collector. These  
2870 additional measures will take approximately 15-20 minutes to complete.

2871

2872 Table 2: Data Collection Incentives

2873

| <b>Data Collection Point</b> | <b>Amount</b> | <b>When</b>                                                                                                                                                                                                                     |
|------------------------------|---------------|---------------------------------------------------------------------------------------------------------------------------------------------------------------------------------------------------------------------------------|
| <b>T1 (Baseline)</b>         | \$40.00*      | Half the day of data collection, half on pick up day                                                                                                                                                                            |
| <b>T2 (3-months)</b>         | \$40.00       | Immediately after                                                                                                                                                                                                               |
| <b>T3 (9-months)</b>         | \$15.00       | Immediately after                                                                                                                                                                                                               |
| <b>T4 (12-months)</b>        | \$40.00*      | Half the day of data collection, half on pick up day                                                                                                                                                                            |
| <b>T5 (24-months)</b>        | \$50.00*      | \$20 the day of data collection, \$20 after completing child accelerometry and at least 2 out of the 3 diet recalls, and \$10 for parent accelerometry and completing the third diet recall.                                    |
| <b>T6 (36-months)</b>        | \$100.00**    | \$25 the day of data collection A, \$25 the day of data collection B, \$25 for completing child accelerometry and at least 2 out of the 3 diet recalls, and \$25 for completing parent accelerometry and the third diet recall. |
| <b>T7 (48-months)</b>        | \$20.00       | Immediately after                                                                                                                                                                                                               |

2874 \*Participant will receive half of the incentive upfront prior to wearing the activity monitor and the other half upon its return and  
2875 completion of at least 2 of the 3 diet recalls. Because the 2<sup>nd</sup> half of the incentive is given only after the wearing of the activity  
2876 monitor and completing 2 of the 3 recalls, we will arrange a day for the participant to pick up their gift card in person at the  
2877 community center or we will send it via the US Postal Service.

2878 \*\*Because the 3<sup>rd</sup> part of the incentive is only given after the wearing of the activity monitor and completing 3 of the recalls, we  
2879 will arrange a day for the participant to pick up their gift card in person at the community center or we will send it via the US  
2880 Postal Service.

2881  
2882  
2883  
2884  
2885  
2886  
2887  
2888  
2889  
2890  
2891  
2892  
2893  
2894  
2895  
2896  
2897  
2898  
2899  
2900  
2901  
2902  
2903  
2904  
2905  
2906  
2907  
2908  
2909  
2910  
2911  
2912  
2913  
2914  
2915  
2916  
2917  
2918  
2919  
2920  
2921  
2922  
2923  
2924  
2925  
2926  
2927  
2928  
2929  
2930

**Intervention Incentives**

Intensive Phase: Participants will receive tangible tools or small giveaways during each session. The value of these items will be approximately \$3.50 per parent and child dyad each week when sessions occur. Examples of tangible tools, items to reinforce lessons learned are kitchen ware utensils, measuring spoons, etc. In addition to the tangible tools, in order to encourage attendance during the intensive phase of the intervention (weekly for 3-months), participants will have an opportunity to enter a raffle. These raffles will be held during 2-3 sessions, including items such as hand mixers (\$10 value) or mixing bowls (\$20 value) The odds of winning the raffle in the intervention group is about 1:15, assuming that on average there are 15 people in attendance each week. Notably, the odds vary based on the number of sessions each person attends individually and the number of attendees in the session. Participants in the GROW study will also be invited to aid recruitment efforts by voluntarily filling out the attached referral form at intervention or control sessions with the names, relationship and contact information of other families they may know with a child age 3 to 5. These referred families would be contacted and invited to participate in the study by research staff either by phone or in person. For every family referred who participates in a screening conversation, the participant would receive a small token gift of appreciation valued at \$5 (e.g., cooking utensils, key chain, Band-Aid holder, etc.). For every family referred that has met eligibility and are successfully enrolled in the study, the referring participant would receive a \$10 gift card as a small token of our appreciation. Word-of-mouth recruitment has been an effective recruitment strategy in our formative phase work. Including small incentives for participants that successfully enroll other interested and eligible families, would serve as an additional strategy to assist recruitment efforts with our hard-to-reach target populations. The maximum number of gift cards participants will receive for this would not exceed \$100 over the course of the 3-year trial.

Maintenance Phase: Participants will receive a coupon for a free fitness class of their choice valid at either community center location each month that coaching calls are completed (monthly for 9-months). Fitness classes such as zumba, line dancing, or yoga, etc are routine services offered to the general public at each of the community recreational centers. The value of this coupon is \$2.00. Participants that complete all 9-monthly phone coaching calls during the maintenance phase will receive a value of \$18 worth of fitness classes for 9-months.

Maintenance and Sustainability Phase: Participants will be invited to participate in classes and various community center events throughout the duration of the maintenance and sustainability phases. Apart from the fitness classes, which are offered by the community centers, we will offer GROW-related community events that focus on nutrition and/or physical activity with parents and children once per month throughout the duration of the 3-year trial. For each class or event attended, participants will receive one punch on their punch card. After every 6 punches, participants will redeem the punch card for a gift valued at \$5.00. These small gifts will include kitchen gadgets such as an apple corer, spatula set, wooden spoon set, etc. If participants attended every event during the 3-year trial, participants will have 5 opportunities for a gift valued at \$5.00, resulting in a total amount of \$25 worth of small gifts in 33-months (maintenance and sustainability phases). For both intervention and control groups, these additional incentives should not pose or be considered coercive since families had already consented to participate in the study. All incentives are tied specifically to participation within the trial and were recommended by families in our prior work in the GROW Formative Phase (IRB No: 100591).



2931 **Health-related Incentives**

2932 In addition to these incentives, all participants from both intervention and control groups in the  
2933 study will receive family memberships to their respective community recreational center for one  
2934 year, which allow adults to use the weight room for no cost. These family memberships will be  
2935 given to all intervention families during the study and all control families at the end of the study.  
2936 Moreover, if families use the facility at least once per month, then their family membership will  
2937 be extended year by year up to 3-years. This will encourage families to utilize their built  
2938 environment for family physical activity.

2939  
2940 The value of the parent and child gym membership for one year equates to \$400 at each  
2941 community center. Although this may be interpreted as undue inducement for families to  
2942 participate in a 3-year RCT study, providing gym membership to participants allows increased  
2943 physical activity and healthy living - a direct benefit and positive health advantage to subject  
2944 participants and their families as opposed to compensation of monetary or economic gains.  
2945 Since increasing physical activity is directly related to the outcome of the study, we  
2946 conceptualize offering gym memberships as a bonus and a justified benefit for those that have  
2947 participated. Compensation will also be given to families participating in the additional sub-  
2948 cohorts for this research study. For the GROW Baby sub-cohort, participating women will  
2949 receive a small incentive valued at \$20 as a token of our appreciation.

2950 For the ACTIVATE sub-cohort, each parent participant will receive a gift card valued at \$10 for  
2951 completing the PAM and Social Network Survey at each data collection point (a total of 2 data  
2952 collection points). For all families participating at our data collection sessions, we will provide a  
2953 nutritious snack.

2954  
2955  
2956  
2957  
2958

2959 ***Randomization***

2960  
2961 Randomization Schedule

2962 An identical randomization procedure will be followed for each of the three successive cohorts.  
2963 Available software (e.g., SAS, Stata) will be used to generate a blocked randomization schedule  
2964 per each strata, within both regions, resulting in 4 total schedules (2 language conditions x 2  
2965 regions = 4). Block size will be randomly permuted with the software procedure (although no  
2966 larger than 10), thereby insuring equal representation at intermittent recruitment points while  
2967 minimizing the probability of correctly guessing subsequent condition assignment.

2968  
2969 Each schedule will be identified by stratum and loaded into the recruitment database. The  
2970 database security settings will be specified so that once loaded no one on the study team will  
2971 have write privileges for the schedules, and only the statistician will have read privileges. These  
2972 settings will prevent anticipation (except for the statistician) or subversion of the randomization  
2973 process by any member of the study team.

2974  
2975 Random Assignment

2976 Each potential dyad's contact information, including child age and dominant language use, will  
2977 be loaded into the recruitment database upon identification as a potential participant and  
2978 assigned a unique study identification number (family id). The recruitment database will follow  
2979 each potential dyad from the point of identification through eligibility assessment and enrollment

2980 through disqualification or randomization. The recruitment database will track all eligibility and  
2981 enrollment criteria and include a utility that checks still-eligible study candidates for criteria that  
2982 must be met prior to randomization. Upon identifying dyads who have met all of these criteria,  
2983 recruitment staff will engage a database utility that performs randomization by identifying the  
2984 stratum into which each potential dyad should be randomized, and populating the next available  
2985 slot in the appropriate randomization schedule with the dyad's family id. The database user will  
2986 not be able to see, and will be unlikely to anticipate, the arm assignment (treatment versus  
2987 control) for each dyad, especially when multiple dyads within a stratum are randomized at once.  
2988 Once the dyad is assigned to an arm, a link is established between family id and arm  
2989 assignment (treatment versus control). This link will not be writable by any study staff and will be  
2990 viewable by the study statistician in the randomization schedules. Dyad's assignments will be  
2991 viewable by all study staff on a case by case basis so that the daily activities of managing  
2992 participants, both parents and their children, may be done without hindrance.

#### 2993 Randomization Data Management

2994 The link between family id and arm assignment will be stored in the randomization schedule, to  
2995 which only the statistician will have read access. All randomized dyads will remain in the  
2996 recruitment database for the duration of the study so that recruitment and enrollment reports  
2997 can be generated on demand by all study staff. By viewing a dyad's record, any study staff can  
2998 view but not edit the dyad's arm assignment.

2999 All dyads' family ids will be exported into a measurement database along with the fields  
3000 necessary to conduct timely data collection and on-demand reporting by any study staff. Arm  
3001 assignment will not be exported to the measurement database. As such, it will not be possible  
3002 for measurement staff to know a dyad's arm assignment based on the information available in  
3003 the measurement database.

3004 In addition, once randomized, the family ids (both treatment and control) will be exported into an  
3005 intervention database along with the fields necessary to conduct the treatment and control  
3006 procedures and allow on-demand reporting. Arm assignment will not be exported to the  
3007 intervention database, although its value is implicitly known. As such, intervention staff (in both  
3008 the control and treatment conditions) will know which dyads have been assigned to which arm,  
3009 but this knowledge is unavoidable and redundant with knowledge that will be apparent from  
3010 contact with the dyads within each arm.

#### 3011 Randomization Data Safety

3012 All databases (recruitment, measurement, etc.), will be stored within a password protected  
3013 shared drive within the university computer system. All study staff will have access to the  
3014 databases upon submitting the required password. Access to tables within these databases will  
3015 be made available as needed to perform job responsibilities and in accordance with COPTR  
3016 policies. The randomization schedule will not be stored in the intervention database making it  
3017 impossible to access in this manner.

3018

#### 3019 ***Risk/Benefit Analysis***

3020 There are minimal research related risks associated with this study. For this study, suggested  
3021 exercises will be mild and are unlikely to cause injury. All suggested dietary changes are  
3022 evidence-based and healthy. If any physical injury or illness should occur as a direct result of  
3023 participation in this study, VUMC maintains limited research insurance coverage for the usual

3024 and customary medical fees for reasonable and necessary treatment of such injuries or  
3025 illnesses. The informed consent document will include this statement and will provide pertinent  
3026 contact information.

3027  
3028 The risks to subjects of the study are reasonable, given their minimal nature (e.g., suggested  
3029 low-moderate physical activity options and healthy dietary changes; learning how to engage  
3030 their children in dialogue) and given the safeguards employed, as described above. In contrast,  
3031 we expect tangible benefits to accrue to all subjects of the study: intervention  
3032 group participants are expected to experience improved healthy lifestyle habits and health  
3033 outcomes as a result of participating in the study; control group parents are expected to  
3034 experience empowerment in their ability to prepare their child for school and control group  
3035 children are expected to be better prepared for school as a result of participating in the  
3036 study. Also all participants are expected to experience increased parent-child bonding as a  
3037 result of participating in the study. All participants will receive family memberships to their  
3038 respective community recreational center, depending on which condition will be during or after  
3039 study implementation, which allow adults to use the weight room for no cost.

3040  
3041

### 3042 ***Data Safety and Monitoring Plan***

3043

#### 3044 General Description

3045 Comprehensive measures will be implemented to maintain subject confidentiality as  
3046 appropriate. Study ID number will identify all data collection materials for the study. Only study  
3047 team members will have access to master linkup lists that match participant names to these  
3048 Study ID numbers. The master link-up list linking names and Study ID numbers will also contain  
3049 some basic demographics to be collected for purposes of the study (e.g., gender, maternal  
3050 education) and personal health information (weight, height, body composition). All data  
3051 collection forms will be housed at VUMC.

3052 All study data will be kept at VUMC securely locked in a storage area for this study. All data will  
3053 be obtained specifically for research purposes. The study investigators reviewing the data will  
3054 not be provided with any participant identification information. Study data collection forms will be  
3055 maintained under lock and key for 10 years following completion of the study. Thereafter, they  
3056 will be destroyed. All electronic data files will be stored on a password protected, secure,  
3057 encrypted server. Only key study personnel will have access to the password. Ten years after  
3058 study completion, electronic copies of all datasets will be destroyed. Individuals will not be  
3059 identified in any publications of the study findings.

3060

#### 3061 ***Data Safety and Monitoring Plan***

3062 **Purpose:** The Data and Safety Monitoring Plan is written to ensure the safety of the participants  
3063 and to verify the validity and integrity of the data.

3064 **Assessment:** Participants will be assessed for adverse events at the time of enrollment and  
3065 when the data is collected at each time-point. The Principal Investigator, co-investigators, study  
3066 coordinator, intervention lists and all members of the research staff are responsible for the  
3067 assessment and reporting of adverse events. All spontaneous reports by subjects, observations  
3068 by clinical research staff, and reports to research staff by family or health care providers will be  
3069 investigated. The investigators will assess the relationship of the adverse event as not related,  
3070 possibly related or definitely related using standard criteria for clinical trials.

3071 **Possible** (to qualify, the adverse event must meet 2 of the following conditions):

- 3072 1) has a reasonable temporal relationship to the intervention,  
3073 2) could not readily have been produced by the subject's clinical state,  
3074 3) could not readily have been due to environmental or other interventions,  
3075 4) follows a known pattern of response to intervention,  
3076 5) disappears or decreases with reduction in cessation of intervention.

3077  
3078 **Probable** (to qualify, the adverse event must meet 3 of the following conditions):

- 3079 1) has a reasonable temporal relationship to the intervention,  
3080 2) could not readily have been produced by the subject's clinical state,  
3081 3) could not readily have been due to environmental or other interventions,  
3082 4) follows a known pattern of response to intervention,  
3083 5) disappears or decreases with reduction in cessation of intervention.

3084  
3085 **Definite** (to qualify, the adverse event must meet at least 4 of the following conditions):

- 3086 1) has a reasonable temporal relationship to the intervention,  
3087 2) could not readily have been produced by the subject's clinical state,  
3088 3) could not readily have been due to environmental or other interventions,  
3089 4) follows a known pattern of response to intervention,  
3090 5) disappears or decreases with reduction in cessation of intervention.

3091

3092

### 3093 **Policy for Blinding in COPTR**

3094 **January 26, 2012**

3095 **Revised July 24, 2014**

3096

### 3097 **Introduction**

3098 In all clinical trials, the potential for bias is one of the main concerns. Bias arises from conscious  
3099 or subconscious factors, and can occur from the initial design through study conduct, data  
3100 management, data analysis and interpretation. A general approach to avoid biases is to keep  
3101 the participants and the investigators blinded to the identity of the assigned arms until all data  
3102 points are collected. As stated by Friedman, Furberg and DeMets, a fundamental point is that:  
3103 *"A clinical trial should, ideally, have a double-blind design in order to avoid potential problems of*  
3104 *bias during data collection and assessment. In studies where such a design is impossible, other*  
3105 *measures to reduce potential bias are advocated."*

3106 **Guiding principle #1:** All COPTR personnel that are in a position to change the study protocol  
3107 or its implementation in study participants, should be blinded to information that may allow them  
3108 to do so, from when the study starts until the study ends, with specific exceptions as delineated  
3109 in this document.

3110 Clarification of terms:

- 3111 • The "study starts" at a site when the first participant is randomized.  
3112 • The "study ends" at a site when the outcomes (primary and secondary) of importance to  
3113 the site have been collected on all participants.  
3114 • "Interim" information is information that is collected between the study start and the study  
3115 end at a given site.

3116

3117 As stated in the "Decision Making Protocol," there are Common and Site-specific elements:

- 3118 • **Common elements** refer to those measures that two or more sites collect, protocols  
3119 and manual of procedures related to those measures, and reporting processes.
- 3120 • **Site-specific elements** refer to those measures and operational activities that relate to  
3121 only one site.

3122

3123 With respect to study information/data, the following is to clarify terms:

- 3124 • Study data – any information collected on study participants, which includes
  - 3125 ○ Primary and secondary outcome variables
  - 3126 ○ Demographic variables
  - 3127 ○ Mediators and moderators
- 3128 • Outcome variables – primary and secondary outcomes as described in site protocols
- 3129 • Process variables – e.g. training, recruitment, intervention implementation, fidelity,  
3130 adherence, retention/attrition

3131

3132 Also, data are available at multiple levels:

- 3133 • Individual subject level, including subject’s family or community
- 3134 • Aggregated by arm, that is, collapsed from individual subject level and combined or  
3135 averaged by study arm

3136

3137 **Guiding principle #2:** All COPTR study site personnel (staff and investigators) should be  
3138 blinded to study data aggregated by study arm that have the potential to impact the study’s  
3139 outcome, or if not possible, measures need to be taken to reduce potential bias. Specific  
3140 exceptions are delineated in this document.

3141 Study data ‘that have the potential to impact the study’s outcome include aggregated: arm-level  
3142 outcome variables, mediators, moderators (OMM), and process variables. Individual level  
3143 outcome variables, mediators, moderators, process, and demographic variables are not blinded.  
3144 Arm-level demographic variables are not blinded.

3145 There may be specific process data collected in one or more arms that the Principal Investigator  
3146 and study staff want to review aggregated by arm before the end of the study. Those variables  
3147 will be declared *a priori* by each site, reviewed by the Design and Analysis Working Group, and  
3148 approved by the PI. Those variables will be clearly listed as unblinded variables in the final  
3149 study protocol. Should sites wish to examine additional blinded process variables aggregated  
3150 by arm, after the study has begun, those requests would also be reviewed by the Design and  
3151 Analysis Working group and, if access is approved by the PI and by the DSMB, those variables  
3152 will be clearly listed as unblinded variables in an amendment to the study protocol. Subsequent  
3153 references in this document to process data will distinguish between blinded and unblinded  
3154 process variables.

3155 In clinical trials that require **interim** monitoring, it is an accepted principle that interim OMM and  
3156 blinded process data aggregated by arm should be kept confidential, with such data accessible  
3157 only to a small number of individuals responsible for its analysis and monitoring. Generally,  
3158 blinding to intervention arms should be maintained to the extent possible until the study ends.  
3159 In COPTR, study investigators and sponsors are not privy to interim OMM and blinded process  
3160 data aggregated by arm, and only the study or independent statisticians/analysts preparing and  
3161 presenting the analysis to the DSMB, as well as the DSMB, are unblinded.

3162



3163 The study arms in the 4 trials are, BY DESIGN, not able to be totally blinded. However, some  
 3164 blinding can be maintained. Measurement staff should not be informed of the intervention that  
 3165 individual participants are receiving, and should have **no role** in the delivery of the intervention.  
 3166 Efforts should be made to avoid participant (child/parents) interactions that result in open  
 3167 chatting with assessors about the interventions they have received. Measurement staff should  
 3168 be trained to end any such communication when initiated by participants.

3169 Study investigators and staff are kept blinded as to the ARM level results until study end. That  
 3170 is, they should **never** see or hear OMM and blinded process data aggregated by arms until the  
 3171 DSMB allows it. Exceptions to this policy are made only for individuals and circumstances in  
 3172 which unblinding is necessary for the preparation of reports to the DSMB. Ancillary studies  
 3173 need to adhere to these same principles.

3174

3175 **Table 3. Summary of issues related to maintaining objectivity as applied**  
 3176 **to COPTR**

|                                                                                                                                                              | <b>COPTR</b>         |
|--------------------------------------------------------------------------------------------------------------------------------------------------------------|----------------------|
| Interventions are comparable and suitable for blinding                                                                                                       | <b>NO, BY DESIGN</b> |
| Investigators/staff are blinded as to arm of an <b>individual</b> participant                                                                                | <b>NOT POSSIBLE</b>  |
| <b>Individual</b> child and/or parent participants are blinded as to the intervention they are receiving                                                     | <b>NOT POSSIBLE</b>  |
| Outcome assessors are blinded as to the intervention the <b>individual</b> participant is receiving                                                          | <b>YES</b>           |
| Site investigators and all study staff, except site statisticians/analysts, are blinded as to ALL the aggregated by arm interim OMM and blinded process data | <b>YES</b>           |
| Site Statisticians/analysts at each field site are blinded as to the aggregated by arm interim OMM data on <b>common</b> measures                            | <b>YES</b>           |
| Site Statisticians/analysts at each field site are blinded as to the aggregated by arm interim OMM on <b>site-specific</b> measures                          | <b>NO</b>            |
| Site staff are unblinded to the aggregated by arm process measures identified <i>a priori</i> or by amendment to the protocol as unblinded                   | <b>YES</b>           |

3177

3178 **Guiding principle #3:** In COPTR, the RCU will function as the ‘Independent Statistician,’ while  
 3179 the individual study center statisticians/analysts will function as the ‘Site Statistician.’

3180



3181 The rationale for keeping investigators and sponsors blinded to interim data is generally  
3182 accepted. The possible conflict of interest that could arise for the site statistician or analyst who  
3183 performs the analysis of the interim data and presents it to a data monitoring committee has  
3184 received little attention. Ellenberg and George (2004) describe some potential conflicts for the  
3185 Site Statistician, and approaches that might be taken to minimize them.

3186 Ellenberg & George (2004) argue that a reason for not blinding the Site Statistician is the  
3187 assumption that the Site Statistician is someone “with no obvious intellectual conflicts of interest  
3188 who, by training and temperament, can be trusted to provide a dispassionate analysis of the  
3189 accumulating data.” This objectivity assumption may or may not be true, and there are many  
3190 pressures exerted on the Site Statistician that is employed and part of the team at a study site.

3191 Each of the 4 COPTR sites has identified an individual(s) who will serve as the Site Statistician.  
3192 The **Site Statistician is the person(s) responsible and accountable** for maintaining the blind  
3193 of any site-specific study OMM and blinded process data from all other site study investigators  
3194 and staff. It is the responsibility of the site Principal Investigator to ensure that the Site  
3195 Statistician understands his/her role and responsibilities. The Site Statistician must have no  
3196 communication with others at the site, formally or informally, about trends in OMM and blinded  
3197 process data and side effects. They must also safeguard data files, printed output, log files and  
3198 any emails or correspondence related to the OMM and blinded process data and side effects  
3199 with the RCU and the DSMB. It is their responsibility to take care in destroying printouts and  
3200 correspondence – ideally by shredding. It is also their responsibility to make sure that any  
3201 discussion and communications of blinded data with the RCU and DSMB are confidential.

3202 The Site Statistician:

- 3203 iv. will be blinded to aggregate comparisons by arm of post-randomization COMMON  
3204 OMM data until all endpoint data have been collected at their site unless otherwise  
3205 instructed by the DSMB.
- 3206 v. will remain objective when carrying out the activities of conducting the trials –  
3207 preparing randomization schemes, randomizing individual subjects, processing of the  
3208 data, cleaning and editing the data, preparation of analyses/reports of site-specific  
3209 OMM and blinded process data, and transmitting the COMMON OMM data to the  
3210 RCU; and
- 3211 vi. is responsible and accountable for maintaining the blind of study site investigators  
3212 and staff at their site with respect to OMM and blinded process data aggregated by  
3213 arm.  
3214

3215 The RCU:

- 3216 v. is the only entity that has personnel that are unblinded to the COMMON OMM data  
3217 aggregated by arm during the trial;
- 3218 vi. will prepare analyses/reports to the DSMB of the COMMON OMM data and adverse  
3219 events aggregated by arm, as requested by the DSMB;
- 3220 vii. shares responsibility for maintaining the blind of study site investigators and staff;  
3221 and
- 3222 viii. is responsible and accountable for maintaining the blind of co-investigators from NIH  
3223 and RCU staff who do not need to be unblinded with respect to COMMON OMM  
3224 data aggregated by arm in order to complete their duties.  
3225

3226 **Responsibilities of the Site Statistician and the RCU**

3227 It is imperative that professional ethical conduct guidelines be followed by the Site Statistician  
3228 and the RCU Independent Statisticians at each stage of the study. The Site Statistician  
3229 prepares the randomization scheme and thus handles the list (datafile, database table, etc.)  
3230 linking study ID to assignment that permits looking at the data aggregated by arm. Thus, this  
3231 person(s) must exercise care in protecting the treatment allocation list and ensuring no one –  
3232 including him/herself - conducts any analyses of COMMON OMM variables, adverse event or  
3233 other follow-up information aggregated by arm. The Site Statistician may prepare descriptive  
3234 reports of site-specific data aggregated by study arm if so directed by the DSMB or RCU. All  
3235 study data must be protected in secure, password protected files or databases with only the Site  
3236 Statistician, their programming staff, and the RCU having access to the data files. Note that  
3237 data needed to interact with and track families (e.g., names, ages, contact info, etc), will not be  
3238 blinded to interventionists, of course.

3239

3240 The list (datafile, database table, etc.) created by the Site Statistician that contains the subject  
3241 ID and the allocation to study arm is protected in a secure and password protected manner with  
3242 only the Site Statistician and the RCU having access to the information.

3243 **Blinding of Investigators by Data Type**

3244 All data collected will be categorized *a priori* into one of 7 categories:

- 3245 viii. *Demographic* information, such as age, sex, country of origin, and contact  
3246 information is not blinded, either at the individual level or aggregated by arm.
- 3247 ix. *Study arm assignment* is concealed until the time of randomization.
- 3248 x. Post-randomization, all field center or site personnel are blinded to *common OMM*  
3249 *data, aggregated by arm*, except as allowed by the DSMB.
- 3250 xi. Post-randomization, all site personnel except the site statisticians/analyst are blinded  
3251 to site-specific OMM data, aggregated by arm. The site-specific OMM data,  
3252 aggregated by arm, are held strictly confidential by the Site Statistician, programmers  
3253 they designate, and the RCU as detailed in this document.
- 3254 xii. *Post-randomization, individual level process data* are viewed by the Principal  
3255 Investigators throughout the study and may also be shared with the interventionists,  
3256 Project Coordinator or Manager. *Arm-level process data* may be viewed by the  
3257 Principal Investigators and shared with the interventionists, Project Coordinator or  
3258 Manager, if those variables are first reviewed by the Design and Analysis Working  
3259 Group, approved for access by the PI, and listed *a priori* as unblinded variables in  
3260 the study protocol or as an amendment to the study protocol.
- 3261 xiii. Post-randomization, blinded process data, aggregated by arm, are held strictly  
3262 confidential by the Site Statistician, programmers they designate, and the RCU as  
3263 detailed in this document.
- 3264 xiv. *Safety data* are collected for the purpose of insuring participant safety. Guidelines  
3265 for viewing these data have been designed by the COPTR Subcommittee on  
3266 Recruitment, Retention, Consent, Adverse Events and Safety.

3267

3268

3269

3270 **Blinding of Investigators to Study Data by Study Stage**

- 3271 iv. **All baseline data** from an individual subject are collected prior to allocation to a study  
3272 arm. Following all baseline data collection on an individual subject, allocation  
3273 information on that subject is made available to site study staff as needed.  
3274 Comparative baseline (pre-randomization) data may be viewed by investigators and  
3275 study staff in aggregate by arm (e.g., for reporting comparability of groups in a  
3276 design and/or baseline manuscripts). The site investigators may analyze and publish  
3277 data collected at baseline using the usual policies of subject confidentiality and  
3278 protection and guidelines set by the COPTR Subcommittee on Publications,  
3279 Presentations and Ancillary Studies.
- 3280 v. **Interim Data (post-randomization)**. All analysis of post-randomization data is required  
3281 to have discussion and approval by PPA, D&A, the Steering Committee, and the  
3282 DSMB, with the exception of analyses conducted by the RCU for purpose of  
3283 completing the DSMB report and pre-approved analyses of process-level data. All  
3284 site personnel are blinded to *common OMM data, aggregated by arm*, except as  
3285 allowed by the DSMB. All site personnel except the site statisticians/analyst are  
3286 blinded to site-specific OMM data, aggregated by arm. The site-specific OMM data,  
3287 aggregated by arm, are held strictly confidential by the Site Statistician, programmers  
3288 they designate, and the RCU as detailed in this document. *Individual level process*  
3289 *data* are viewed by the Principal Investigators throughout the study and may also be  
3290 shared with the interventionists, Project Coordinator or Manager. *Arm-level process*  
3291 *data* may be viewed by the Principal Investigators and shared with the  
3292 interventionists, Project Coordinator or Manager, if those variables are first reviewed  
3293 by the Design and Analysis Working Group, approved for access by the PI, and  
3294 listed *a priori* as unblinded variables in the study protocol or as an amendment to the  
3295 study protocol. Blinded process data, aggregated by arm, are held strictly  
3296 confidential by the Site Statistician, programmers they designate, and the RCU as  
3297 detailed in this document. **No interim OMM or blinded process data from any arm**  
3298 **are available for publication or presentation until the end of the study, unless**  
3299 **the plan has been (1) reviewed by the Design and Analysis Working Group and**  
3300 **the Publications Subcommittee and (2) approved by the site PI, the Steering**  
3301 **Committee, and the DSMB.**
- 3302 vi. **Final data**. *Final data* are held private at each site or at the RCU in the same  
3303 manner as the Interim data until the end of the study. The end of the study at each  
3304 site is defined as the moment that the last study data point at that site has been  
3305 collected and recorded. This includes data from all study index children as well as  
3306 data from other individuals and entities at a study site. At the end of the study, all  
3307 study data, including data on study arm assignment, can be accessed by study  
3308 investigators using the usual policies of subject confidentiality and protection and  
3309 guidelines set by the COPTR Subcommittee on Publications, Presentations and  
3310 Ancillary Studies.  
3311

3312 **Preparation of Study Data Reports for the DSMB**

- 3313 v. Accumulated data will be ‘frozen’ at a specified date for the particular report. A copy  
3314 of the ‘frozen raw datafile of COMMON measures’ is sent to the RCU for analysis  
3315 along with the protected list of the treatment allocation.
- 3316 vi. After processing, cleaning, editing, creating derived variables, the dated ‘analysis  
3317 files’ of COMMON variables (including treatment allocation) and relevant  
3318 documentation are sent to the RCU. Site-specific data are not sent to the RCU.

- 3319      vii.      For COMMON variables, the Site Statistician conducts analyses for the purposes of  
 3320 data cleaning and looking for outliers, unusual trends and distributional anomalies of  
 3321 the data from their own site, overall – **not** by study arm. They do not generate  
 3322 comparative analyses by study arm. Information generated (not the raw data) may  
 3323 be shared with other site investigator/s for the purposes of conducting data cleaning.  
 3324 The cleaned COMMON variables data are sent to the RCU, along with means and  
 3325 frequencies for all variables. The RCU will prepare means and frequencies for all  
 3326 variables and compare them to the site results to confirm accurate transfer of data.  
 3327 The RCU will prepare descriptive and quality control tables for presentation to the  
 3328 DSMB, both overall and by study arm. No modeling is done by the RCU unless they  
 3329 are specifically instructed to do so by the DSMB.
- 3330      viii.      For **site-specific** data, the Site Statistician conducts analyses for the purposes of  
 3331 data cleaning and looking for outliers, unusual trends and distributional anomalies  
 3332 from their own site, in a manner similar to that described above for COMMON  
 3333 variables. Different from common variables, the Site Statistician prepares descriptive  
 3334 and qualitative data reports using templates developed in cooperation with the RCU.  
 3335 These reports will not be generated by study arm unless instructed to do so by the  
 3336 DSMB. Otherwise, site-specific variables will be examined only with data from all  
 3337 study arms combined.  
 3338

3339      **Data on Participant Safety**

3340      As with other data, safety data will be blinded, as possible, to the investigators and staff at each  
 3341 site (not possible when obviously related to the intervention or collected during an intervention  
 3342 activity, for example). The objectively collected adverse events data, however, are collected the  
 3343 same way in all arms and will be blinded. Sites should see only aggregate data (all treatment  
 3344 arms combined) although RCU can prepare data for DSMB by arms.

3345      **Treatment condition unblinding recommendations**

3346      Study arms

3347      Decisions to unblind the site investigators to arm-level experimental assignment will be the  
 3348 responsibility of the DSMB according to the following steps.

- 3349      vi.      RCU prepares adverse events and safety reports by unidentified arm (e.g., group A,  
 3350 group B) in the twice-yearly DSMB reports.
- 3351      vii.      DSMB reviews adverse events and other safety-relevant data at their periodic  
 3352 meetings.
- 3353      viii.      If the DSMB identifies a potentially important difference between arms in adverse  
 3354 events or other safety-related data, they may request additional analyses and/or  
 3355 request unblinding of arm assignment (e.g, treatment and control), and may consult  
 3356 with the NIH, RCU and PI(s) to help them interpret the findings. Unblinding, if  
 3357 necessary, should be limited to only those investigators who need to know to protect  
 3358 the safety of participants.
- 3359      ix.      If the DSMB determines that the differential between arms may impact the safety of  
 3360 participants and/or changes the assessment of risk of participation, they will make  
 3361 the appropriate recommendation to the NIH who, in turn, will notify the site PIs,  
 3362 accordingly.
- 3363      x.      It is the responsibility of the site PIs to report to their site IRBs.  
 3364

3365 **Presentation of Reports to the DSMB**

3366 The RCU statisticians will be presenting the report, which includes the report on the common  
3367 measures, plus each site’s site-specific variables report. The Site Statisticians are available to  
3368 be contacted by phone during the DSMB meeting in case questions arise that they are in a  
3369 better position to answer about the site-specific variables and the overall site analyses. Site  
3370 Statisticians may not participate in any portion of the meeting or call in which unblinded common  
3371 OMM data are discussed.

3372 **Timeline for preparation of reports to the DSMB**

3373 Typically there is a roughly a 7-week period prior to the date of the meeting for preparing the  
3374 DSMB report. Adherence to this timeline assumes that data entry and cleaning have been  
3375 ongoing and that templates used to generate tables have already been created. It also  
3376 recognizes that some data, such as blood analyses, actigraph, and diet data, that undergo other  
3377 processing, may be delayed in comparison to other types of data.

3378 **Table 4. Timeline for preparation of reports to the DSMB**

|          |                                                                                                                                                                                                                                        |
|----------|----------------------------------------------------------------------------------------------------------------------------------------------------------------------------------------------------------------------------------------|
| -7 weeks | <ul style="list-style-type: none"><li>• data ‘frozen’ for the report on same date at each field site</li><li>• copy of raw frozen COMMON measures files sent to RCU</li></ul>                                                          |
| -5 weeks | <ul style="list-style-type: none"><li>• data processing, data cleaning, data editing, datafile creation at each field site completed</li><li>• clean COMMON measures files sent to RCU</li></ul>                                       |
| -3 weeks | <ul style="list-style-type: none"><li>• data reports on site-specific variables prepared, reviewed at each field site and sent to RCU</li><li>• data reports on COMMON variables prepared and reviewed internally at the RCU</li></ul> |
| -2 weeks | <ul style="list-style-type: none"><li>• RCU compiles reports, assembles binders and sends to DSMB</li></ul>                                                                                                                            |
| 0 weeks  | <ul style="list-style-type: none"><li>• DSMB meeting</li></ul>                                                                                                                                                                         |

3379

3380 At the meeting, the RCU presents the report, and afterwards collects all reports for archival. The  
3381 RCU communicates with site investigators and Site Statisticians on relevant issues raised by  
3382 the DSMB – such communication is not shared with other site staff or investigators.

3383 **Communication of the Policy for Blinding in COPTR**

3384 In order to insure that this policy is clearly understood and communicated, all COPTR study  
3385 Principal Investigators, the NIH Project officer, the Site Statistician and the RCU members  
3386 involved in data management or analysis will confirm compliance. Over the course of the study  
3387 as new personnel are hired, they will also confirm compliance. This will be done by each of  
3388 these individuals sending an email to the COPTR Communications Manager as follows:

3389 I have read, understood and agree to comply with the 9 page document entitled,  
3390 *Policy for Blinding in COPTR.*

3391 The RCU will maintain a list of the names of individuals from whom this confirmation has been  
3392 received, and this list will be available for inspection by the DSMB.

3393

3394



3395 **References**

- 3396 3. Ellenberg SS, George SL (2004) Should statisticians reporting to data monitoring  
3397 committees be independent of the trial sponsor and leadership? *Statistics in Medicine*  
3398 23:1503–1505.  
3399 4. Friedman LM, Furberg CD, DeMets DL (2010) Fundamentals of Clinical Trials, 4<sup>th</sup> ed.,  
3400 Springer, NY.

3401

3402

3403 ***Study Design, Statistical Consideration and Analysis Plan***

3404

3405 Study Design

3406 The design of the study is a longitudinal non-blinded (open) randomized control trial. Within  
3407 each of two sites, adult-child dyads with children ages 3-5 years will be randomly assigned,  
3408 stratified according to parent language use (English or Spanish), to either the three-year  
3409 prevention program or the control condition. Assessments will occur over six time points within  
3410 each cohort, beginning at baseline and including assessments post-intervention (at 12 weeks/3  
3411 months), and at 9, 12, and 36 months from baseline.

3412

3413 Primary Research Question and Hypothesis

3414 Our primary research question is about the impact of the GROW trial on the growth rate of  
3415 children's BMI over time. Specifically, we hypothesize the following:

3416 Hypothesis 1: The BMI trajectories of children in the treatment group will change at a slower  
3417 rate than those in the control group over time.

3418

3419 Primary Outcome

3420 Although childhood obesity is a well-documented public health concern, most studies have  
3421 assessed the obesity outcome (e.g., BMI) using only a single time point or incorporating a pre-  
3422 post design, leaving us with little knowledge about the actual shape or growth rate of trajectories  
3423 of BMI during this critical period of development. Indeed, few studies have taken a  
3424 developmental perspective in order to understand how and when obesity develops in early  
3425 childhood. By measuring BMI at multiple time points, we will examine growth trajectories in early  
3426 childhood. This will allow us to examine the effect of a prevention program on these varying  
3427 trajectories (Agras, Hammer et al. 2004; Pryor, Tremblay et al. 2011). As Barker et al.  
3428 demonstrated, it is the change in BMI over time in early childhood, rather than BMI at any one  
3429 time point, that is linked with health consequences in adulthood (Barker, Osmond et al. 2005).  
3430 Moreover, an earlier childhood adiposity rebound is associated with an increased risk of later  
3431 obesity (Rolland-Cachera, Deheeger et al. 1984; Cole 2004). Because clinical literature about  
3432 childhood obesity indicates that the shape of the BMI trajectory across ages three to eight is  
3433 curvilinear, we will account for this in our analytic plan (Kuczmarski, Ogden et al. 2002; Cole  
3434 2004) (see below).

3435



3436 Primary Analysis

3437 Statistical model and approach

3438 Our primary analysis will be an intent-to-treat analysis, and we will fit a multilevel mixed-effects  
3439 linear model using a maximum likelihood procedure to handle missing data.

3440 Time-varying BMI will be the outcome at Level 1 nested within children at Level 2. Time at  
3441 Level 1 will be in years since baseline as computed from the date of each child's measurement  
3442 at each time point. The following child-level (Level 2), time invariant variables will be predictors  
3443 of the linear and quadratic BMI growth rates and the intercept at Level 1: age at baseline  
3444 (centered at a value of interest) and random assignment to intervention or control. Child gender  
3445 will be a child-level (Level 2), time invariant predictor of the intercept at Level 1. This approach  
3446 allows the estimation of growth rates based on each child's individual measurement dates, and  
3447 accounts for both age at baseline and time in the study.

3448 The Level 1 equation is as follows:

$$BMI_{ti} = \pi_{0i} + \pi_{1i}(Time)_{ti} + \pi_{2i}(Time)_{ti}^2 + e_{ti}$$

3449 where BMI for each child  $i$  is repeated over time  $t$ . BMI for a given child is a function of the  
3450 individually varying baseline intercept  $\pi_{0i}$ , the linear growth rate  $\pi_{1i}$  across 36 months, the  
3451 quadratic growth rate (acceleration)  $\pi_{2i}$ , and a random error term.

3452

3453 The intercept and two growth parameters will then be regressed on Level 2 (child-level)  
3454 predictors as follows:

3455 BMI Intercept:  $\pi_{0i} = \beta_{00} + \beta_{01}(age - C)_i + \beta_{02}(I)_i + \beta_{03}(F)_i + r_{0i}$

3456 Linear Growth:  $\pi_{1i} = \beta_{10} + \beta_{11}(age - C)_i + \beta_{12}(I)_i + r_{1i}$

3457 Quadratic Growth:  $\pi_{2i} = \beta_{20} + \beta_{21}(age - C)_i + \beta_{22}(I)_i + r_{2i}$

3458 where  $I$  is an indicator for group assignment and equals 1 for the intervention group and 0 for  
3459 the control group, and  $F$  is an indicator for sex and equals 1 for females and 0 for males.  $\beta_{00}$  is  
3460 the mean initial BMI in control group males while adjusting for child age at baseline (centered),  
3461  $\beta_{01}$  is the effect of child age at baseline (centered) on initial BMI,  $\beta_{02}$  is the effect of being  
3462 assigned to the intervention group on initial BMI (expected to be 0),  $\beta_{03}$  is the effect of being  
3463 female on initial BMI, and  $r_{0i}$  is the random error variance.  $\beta_{10}$  represents the linear growth rate  
3464 at baseline in the control group while adjusting for child age at baseline, and  $\beta_{11}$  is the effect of  
3465 child age at baseline on linear growth.  $\beta_{12}$  is the intervention effect on linear growth, and  $\beta_{22}$  is  
3466 the intervention effect on BMI acceleration while adjusting for child age at baseline.

3467 The Level 1 and Level 2 equations can then be combined and regrouped to yield a single  
3468 equation for the model:

$$BMI_{ti} = [\beta_{00} + \beta_{01}(age - C)_i + \beta_{02}(I)_i + \beta_{03}(F)_i] \\ + [\beta_{10}(Time)_{ti} + \beta_{11}(age - C)_i(Time)_{ti} + \beta_{12}(I)_i(Time)_{ti}] \\ + [\beta_{20}(Time)_{ti}^2 + \beta_{21}(age - C)_i(Time)_{ti}^2 + \beta_{22}(I)_i(Time)_{ti}^2] \\ + [r_{0i} + r_{1i}(Time)_{ti} + r_{2i}(Time)_{ti}^2 + e_{ti}]$$

3469 where the terms in the first bracket contribute to the intercept, the second bracket's terms  
3470 contribute to the linear growth, the third bracket's terms contribute to the quadratic growth, and

3471 the final bracket contains all of the random error terms. We will specify an unstructured  
3472 variance-covariance matrix.

3473 We will conduct a likelihood ratio test with two degrees of freedom to test whether the linear and  
3474 quadratic intervention effects ( $\beta_{12}$  and  $\beta_{22}$ , respectively) are jointly equal to zero. If this joint test  
3475 is not significant at  $p < 0.05$  then intervention effectiveness is not demonstrated. If this joint test  
3476 is significant at the  $p < 0.05$  level, then the intervention effect was significant.

3477

3478 *Checking and Sensitivity Analyses:* Once a model has been estimated, we will need to  
3479 investigate its properties not only to ensure that any data idiosyncrasies do not impact the  
3480 results but also to help ensure that the results are generalizable. The first issue is to check for  
3481 systematic differences between the model and the data using graphs, such as comparisons of  
3482 predicted and observed values of BMI, and other standard diagnostics (Snijders 2008). An  
3483 extension of this idea is to simulate new sets of outcomes, based on our model, and use the  
3484 simulated data as a reference test group by comparing this set to the observed result; in this  
3485 case, we would look for situations in which the data appear different from what we would expect  
3486 by using the model to predict the data (Gelman 2007).

3487

3488 A second issue is whether we have left out important features of the model, including, for  
3489 example, (1) age at randomization, (2) measurement occasion, (3) study wave (by which we  
3490 mean enrolled in first year, second year, or third year of the program), or (4) other demographic  
3491 variables (e.g., SES, parent level of education) or substantive covariates (e.g., maternal  
3492 depression). Some of these variables will be tested explicitly as moderators or mediators (see  
3493 previous sections pertaining to moderators and mediators as well as sections 11.6 and 11.7  
3494 below). In addition, trajectories may vary by baseline BMI; this possibility will be checked by  
3495 estimating a model with a baseline BMI by treatment group interaction. We will estimate  
3496 additional models that include one or more of these additional features to check whether  
3497 inclusion of any of these predictors is both statistically reasonable and affects our conclusions.

3498

3499 A third issue is whether age is correctly specified. With six data points, a limit exists as to what  
3500 can reasonably be done. We suggest that the quadratic model should be checked in two ways:  
3501 (1) substitute linear splines with a break between, for example, ages 4 and 5 (anticipated  
3502 adiposity rebound timing); (2) substitute non-linear splines, in particular, restricted cubic splines  
3503 with 4 knots chosen following Harrell's default positions (Harrell 2001).

3504

3505 A fourth issue relates to the potential correlation among the clusters/subgroups in our analysis:  
3506 to what extent are these clusters correlated, what is the effect of that correlation on our results,  
3507 and how accurately have we specified the clusters? Although we will not use the cluster-  
3508 adjusted robust sandwich estimator in our primary analysis, we will, as a safeguard, fit a model  
3509 that assumes a cluster structure within the data and compare the standard errors of this model  
3510 to those from our primary model. If there are substantive changes in the standard errors, further  
3511 work will be done to see which set of standard errors is more appropriate in our situation.

3512

3513 Missing data including level of attrition, lost to follow-up, and missing data treatment

3514 Estimated Attrition: Within each planned cohort of 200 dyads per three cohorts, six waves of  
3515 data collection will occur, with shorter time intervals between the earlier waves and longer time  
3516 intervals later. According to prior community-based studies, subject dropout decelerates over  
3517 time, with the worst losses occurring early. We will make every effort to reduce attrition, with  
3518 particular focus on the earlier waves of the study, to ensure that we retain at least 80% of our  
3519 sample within each cohort, yielding a cohort size of at least 160 and a total sample size, at  
3520 study end, of at least 480. This level of attrition would leave us sufficiently powered (.90) to be  
3521 able to detect a standardized effect size of .40 (a respectable and common effect size unique to  
3522 the analytic method we are using--see sample size and power analysis section). An even larger  
3523 sample size will increase the power to detect a meaningful difference, as explicated in the  
3524 power analysis and sample size section below, and we will strive to ensure that the sample is as  
3525 large as possible at each successive wave. In addition, it is important to note that our analysis is  
3526 an intention-to-treat analysis. Accordingly, we will use all cases in our analyses, even those with  
3527 as few as one wave of data, such that attrited cases will not truly be lost but instead retained in  
3528 our analytic procedures.

3529

3530 Missing Data: Conceptually, we anticipate two types of missing data: (1) people who drop out  
3531 after a measurement occasion and never return [i.e., lost to follow up]; and (2) people who miss  
3532 one or more particular measurement occasions (e.g., occasion three) but are present for each  
3533 of the others, at least one of which is later in time than the one (or more) that they missed.

3534

3535 With six repeated measurements, some participants inevitably will miss one or more occasions  
3536 of outcome data collection. One advantage of the mixed models over older repeated measure  
3537 ANOVA models is the use of all available data without dropping any subjects (Nich and Carroll  
3538 1997). We begin by assuming that the missing occasions meet MCAR or MAR assumptions  
3539 (Little and Rubin 2002). If so, the results of the mixed model (e.g., the effect of time, group by  
3540 time) are robust.

3541

3542 To guard against missingness biasing results, we will also conduct secondary analyses of  
3543 missingness to see how realistic the assumption of MAR or MCAR may be. This check can be  
3544 done in several ways. We will start with descriptive statistics comparing the characteristics of  
3545 observations with and without missing values (e.g., gender, baseline BMI, age at enrollment,  
3546 etc.). The first analysis will use standard multiple-imputation with 100 imputations (Little and  
3547 Rubin 2002). Three possible directions, in addition to standard diagnostics (White, Royston et  
3548 al. 2011) can be pursued when checking whether being missing is non-random (i.e., in checking  
3549 the results of the multiple imputation):

3550

3551 1) The first method is our primary suggestion: we will impute the data using standard  
3552 multiple imputation (MI) software but with constraints on the values that can be imputed.  
3553 These constraints arise because our prime concern regarding non-random missingness  
3554 is that either those who don't need the program (i.e., those who are lean) or those who  
3555 perceive that they are not seeing an effect (i.e., who are, and remain, overweight) will  
3556 miss occasions. For example, in one set of imputations we would constrain all imputed

3557 BMIs to be below, say, "a"; in a different set, we would constrain the imputed BMIs to be  
3558 above, say, "b"; this type of constrained MI is discussed in An and Little(An, Little et al.  
3559 2010) and Jenkins, Burkhauser, Feng, and Larrimore(Jenkins, Burkhauser et al. 2011).  
3560 One hundred imputations will be used for each such constrained MI. We will examine  
3561 the BMI pattern of those who drop out and, if we see evidence of either "a" or "b", use  
3562 the values we observe to set the constraints.

3563 2) A second possible type of sensitivity analysis was originally suggested by Rubin (1987)  
3564 and has been extended by Carpenter, Kenward, and White,(Carpenter, Kenward et al.  
3565 2007) who suggest weighting each imputed result (rather than Rubin's standard simple  
3566 averaging of the results), where the weight depends on the assumed departure from the  
3567 MAR assumption. Their technique relies on at least one strong assumption, but they  
3568 provide a graphical diagnostic to help check this assumption.

3569 3) If drop-outs (situation one above) are much more common than missing an occasion and  
3570 then returning (situation two above), we will estimate a pattern-mixture model (Little  
3571 1993; Hedeker and Gibbons 1997). If missing one or more occasions and then returning  
3572 is relatively common, however, we will not pursue this strategy.

3573

3574 Detectable Difference, Sample Size, and Power

3575 Power and Sample Size Estimation: The power analysis was performed on our primary analysis  
3576 (see below): a quadratic model of the BMI trajectories. For our sample size estimation, we used  
3577 the OD (Spybrook 2011) software so that we would be consistent with our planned analysis.  
3578 This software allowed us to examine two-group repeated-measures trials with quadratic change,  
3579 the same model being used for the analysis.

3580

3581 This software uses a standardized effect size as defined in Raudenbush and Liu, namely, the  
3582 group difference on the polynomial trend divided by the "population standard deviation of the  
3583 polynomial trend of interest" (p. 391; the "population standard deviation" refers to the square  
3584 root of the variance of the random effect) (Raudenbush and Xiao-Feng 2001). This specification,  
3585 particularly the denominator, is quite different from cross-sectional standardized effect sizes  
3586 such as Cohen's D, given that, with a polynomial model (here quadratic), the difference between  
3587 groups depends on the point in time examined. In particular, given our hypothesis (see below),  
3588 we expect that, after adiposity rebound is reached, the BMI of children in the intervention group  
3589 will grow more slowly than that of children in the control group such that the differences between  
3590 their mean BMIs will increase over time. Our expectation implies that we are interested in the  
3591 significance of the quadratic term in the model, and expect that the difference between the  
3592 control and treatment group quadratic effect will be significantly different from zero.

3593

3594 We note one difference between the OD program's assumptions and our study: the OD program  
3595 assumes that the measurement occasions will be equally spaced over time, which is not the  
3596 case in our study. As a result, specifications from the OD program may lead us to overestimate  
3597 power and underestimate sample size. Power is high in the current study, as can be seen in the  
3598 table below, thus we expect that these potential mis-estimations are not problematic.

3599

3600 To determine the power and effect size of the current study, we need estimates of the  
3601 standardized effect size, which we obtained from a subset of our previous Salud Con La Familia  
3602 study. We used only a subset of the Salud subjects because the inclusion criteria for that study  
3603 (i.e., children at any level of baseline BMI) were broader than for the current study (i.e., children  
3604 whose baseline BMI is between the 50<sup>th</sup> and 95<sup>th</sup> ([or 99<sup>th</sup>] percentile). For our estimations, then,  
3605 we used only the Salud data for those from the 50<sup>th</sup> to the 95<sup>th</sup> percentile (and then again from  
3606 the 50<sup>th</sup> to the 99<sup>th</sup> percentile [see below]). Other important differences exist between Salud and  
3607 the current study, however, that limit our ability to estimate power and sample size based solely  
3608 on Salud: (1) the Salud subjects had only three measurement occasions which covered 15  
3609 months rather than six occasions over three years (the GROW trial) and (2) the Salud  
3610 intervention was comparable only to the 12-week intensive phase proposed in the GROW study  
3611 and did not include a maintenance or sustainability phase as proposed in the GROW trial. We  
3612 expect that the increased number of sessions as well as the intensity of the intervention in the  
3613 GROW trial will serve only to increase the power of the GROW study.

3614

3615 When using the OD software, the user can set various values, the most important of which is  
3616 the standardized effect size discussed above. Other possible values to set include the duration  
3617 of the study (here, three years), the number of measurement occasions (here six), and the  
3618 variance of the residuals and the variance of the random effects. We found that even fairly  
3619 sizable changes in value used for the residuals and the variance of the random effects had little  
3620 effect on the projected sample size (e.g., holding other elements constant and changing the  
3621 variance of the random effect of age-squared from the observed standard deviation of 2.8  
3622 [based on the Salud data] to the OD program's default of 1, only increased the sample size at a  
3623 power of 0.8 by about 20 subjects). Using the program defaults for residuals and variance of the  
3624 random effects was a conservative (i.e., produced larger estimates of sample size) approach  
3625 compared to using the results based on Salud, thus we used these defaults in the table below.  
3626 Changing the standardized effect size does have important consequences for the estimated  
3627 sample size, however (see Table 5).

3628

3629 As previously stated, we used the Salud data to estimate our primary model (see below) for  
3630 those within that study who were between the 50<sup>th</sup> and 95<sup>th</sup> BMI percentiles at baseline. The  
3631 control group in the Salud data showed unexpected results with virtually no non-linearity (i.e.,  
3632 their BMI trajectories increased but in a linear fashion over a 15 month period), therefore we  
3633 believe that the effect size from that model, which was quite large and based on different  
3634 assumptions, is an overestimate of the effect that we will see in the GROW study. Instead we  
3635 used the OD program default for the effect size of 0.4, a commonly used effect size in  
3636 longitudinal studies and thus the OD program default, to estimate our required sample size.  
3637 Accordingly, Table 5, below, indicates, for powers of 0.7, 0.8, and 0.9, the estimated sample  
3638 size using the OD program for the default effect size (0.4) and for two additional effects sizes, a  
3639 smaller and more conservative effect size (0.3) and a larger and more liberal effect size (0.5).  
3640 As the table below indicates, we estimate that retaining a sample size of at least 480 will leave  
3641 us adequately powered to determine this middle/medium effect size of 0.4.

3642

3643 **Table 5: Estimated required sample size for given standardized effect sizes**



| Power/Effect Size | Sample size for Standardized Effect size = 0.3 | Sample size for Standardized Effect size = 0.4<br>( <i>OD program default</i> ) | Sample size for Standardized Effect size = 0.5 |
|-------------------|------------------------------------------------|---------------------------------------------------------------------------------|------------------------------------------------|
| 70.00%            | 500                                            | 285                                                                             | 186                                            |
| 80.00%            | 640                                            | 360                                                                             | 232                                            |
| 90.00%            | 860                                            | 480                                                                             | 308                                            |

3644

3645 Because the results of our pilot study currently underway have led us to consider including  
3646 children with higher baseline BMI in the GROW trial than we had originally planned, we also  
3647 estimated our primary model on Salud participants who were between the 50<sup>th</sup> and 99<sup>th</sup>  
3648 percentile of baseline BMI to determine the effects of including these children with a higher BMI.  
3649 While, as expected, the variance increased when we moved to the model that added children  
3650 between the 95<sup>th</sup> and 99<sup>th</sup> percentiles, the difference between groups (control and intervention)  
3651 also increased such that the standardized effect size changed very little and, thus, there was  
3652 virtually no effect on power (i.e., the desired sample size, under various conditions, never  
3653 changed by more than two people). If, then, we decide to extend our criteria in the GROW trial  
3654 to include children who are in the 95<sup>th</sup> to 99<sup>th</sup> percentile of BMI at baseline, our analyses will  
3655 continue to be sufficiently powered.

3656

3657 Currently, the design for the GROW trial includes 600 children, and, though we would expect to  
3658 be adequately powered at a smaller number of subjects, we plan to recruit 600 subjects to allow  
3659 for potential attrition. We note, however, that if recruitment of that higher number of subjects  
3660 becomes problematic (and we have observed in our current pilot study the difficulties inherent in  
3661 recruitment for a similar prevention trial), we will stop subject recruitment at a smaller number of  
3662 subjects, though ideally not less than 480 (see Table 5), such that we are adequately powered.

3663

#### 3664 Analysis for Possible Effect Modifiers

3665 The variables that are listed in the previous section as moderators (e.g., race/ethnicity, genetic  
3666 risk score, etc.) will be entered appropriately into the analytic model as interaction terms in order  
3667 to test the effect of the moderator on the outcome (child BMI trajectory). Relevant three-way  
3668 interactions (e.g., child gender by age by group) will also be tested.

3669

#### 3670 Analysis for Possible Effect Mediators

3671 The variables that are listed in the previous section as mediators/covariates will be entered into  
3672 the analytic model as time-varying covariates and their effects on the outcome will be assessed  
3673 accordingly, controlling for all else in the model.



3674

3675 Secondary Hypotheses and Analysis

3676

3677 Secondary Analyses: We list below two sets of secondary analyses. The first is specific to our  
3678 primary analysis (see Aim 1, Hypothesis 1); the second is specific to the secondary aims and  
3679 related hypotheses (see Aims 2-6) and contained under section 11.9 (below).

3680

3681 **Secondary Analyses in relation to the Primary Hypothesis and Analysis**

3682

3683 1) Timing of adiposity rebound: We anticipate that we will be able to characterize and  
3684 capture the timing of adiposity rebound for many of the children enrolled in the study. At  
3685 time of enrollment, each child is at least three years of age and is less than six years of  
3686 age (and we will know, including fractions, how old they are at enrollment by collecting  
3687 their date of birth); measurement occasion six will occur at least three years after  
3688 enrollment. Using these conditions, those who enroll on their third birthday will be at  
3689 least six years old at measurement occasion six (and everyone else will be older); in this  
3690 scenario it is reasonable to assume that most subjects who enroll at age three will have  
3691 reached adiposity rebound by measurement occasion six, although we will miss some  
3692 children who have earlier/later rebound timing. Also, virtually all children who enroll at  
3693 age four should experience adiposity rebound during the study, but a few might be  
3694 earlier than four or later than seven. Finally, the majority of those who enroll at age five  
3695 should experience adiposity rebound during the study, but a minority will have  
3696 rebounded prior to age five. Note that the mean age at adiposity rebound is a simple  
3697 function of the coefficients from the main model:  $-\beta_2/(2*\beta_3)$  will be the nadir for the control  
3698 group (and a similar calculation captures the intervention group:

3699  $-\beta_4/(2*\beta_5)$ ).

3700 2) The effect of parental change in BMI over the study period on child's growth trajectory: In  
3701 this study, this effect will be modeled by including baseline BMI of the parent as a  
3702 predictor, and also including other measures of parent BMI as time-varying covariates  
3703 (i.e., the value of the covariate depends on the measurement occasion).

3704 3) We will test the difference between mean BMI for both groups at the end of the trial (36  
3705 months) to determine whether they are significantly different from one another, thus  
3706 adding additional information to our analyses.

3707 4) We will test whether the trajectories of both normal and overweight children in the  
3708 treatment group accelerate at a slower rate than those in the control group over time,  
3709 such that those in the treatment group will be less likely to evidence trajectories of  
3710 obesity compared to those in the control group. Each child will be categorized as having,  
3711 or not having, an acceptable BMI trajectory. This binary variable will be the outcome  
3712 variable for this secondary analysis. We will test this first, in an unadjusted analysis (a 2  
3713 by 2 table where one variable is the outcome variable and the other is group [control or  
3714 treatment]), and then in an adjusted analysis using logistic regression. Predictors in the  
3715 logistic regression will include demographics (e.g., gender) and various baseline  
3716 variables, including the baseline BMI weight category (i.e., normal or overweight).

3717 5) In a series of secondary analyses, we will examine the random-effects in more detail:

- 3718 1. Using our original fitted model, we will impose an independent covariance matrix  
3719 (which assumes no correlation between random effects), reducing the resulting  
3720 number of random effects from seven to five. The results of this change to the model  
3721 will inform us about the next two steps (see below).
- 3722 2. We will add the two age-squared terms (for intervention and control) as random  
3723 effects, continuing to use the independence structure, and bringing the number of  
3724 random effects back to seven.
- 3725 3. Keeping the two age-squared terms as random effects, we will return to an  
3726 unstructured covariance matrix, bringing the number of random-effects to 13.
- 3727 4. At each step in the above process, we will evaluate the results of continuing to add  
3728 additional random effects terms, including noting model convergence problems.  
3729 While we believe the model with 13 random effects will have reduced power and thus  
3730 do not propose this model for our primary analysis, we believe that fitting this model  
3731 in a secondary analysis, via the systematic steps outlined above, will allow us to  
3732 examine the consequences of including a large number of random effects and  
3733 determine the viability of this alternate model.
- 3734 5. It is possible that in addition to different ICC's per condition, variability may occur  
3735 across sessions within condition, such that a range of ICCs exists. If that range is  
3736 determined to be sufficiently wide, we will consider adding cluster-adjusted standard  
3737 errors for both the fixed and random-effects. Note that this type of standard error is a  
3738 generalization of the traditional sandwich estimator; StataCorp has provided a FAQ  
3739 on this generalization with citations:  
3740 [http://www.stata.com/support/faqs/stat/robust\\_ref.html](http://www.stata.com/support/faqs/stat/robust_ref.html).

3741

3742 Singer, J.D., & Willett, J. B. (2003). Applied longitudinal data analysis: Modeling change and  
3743 event occurrence. New York, NY: Oxford University Press.

3744 Harold, G. T., et al. (2013). Depressive symptom trajectories among girls in the juvenile justice  
3745 system: 24-month outcomes of an RCT of multidimensional treatment foster care. Prev. Sci.  
3746 (14). DOI: 10.1007/s11121-012-0317-y.

3747

3748 Additional Analyses

3749

### 3750 **Secondary Analyses in relation to the Secondary Aims and Hypotheses**

3751 In addition to the above analyses, we will conduct analyses necessary to support our secondary  
3752 aims of the trial, as outlined below.

3753

3754 **Aim 2: Compare the effect of the intervention in children who made significant changes**  
3755 **in their dietary and/or physical activity behaviors to the effect in children who did not.**  
3756 Hypothesis 2: Relative to children in the control condition, children participating in the treatment  
3757 condition will:

3758 2.1 Have lower sedentary activity levels (as measured by actigraphy data) after the intensive  
3759 phase of the intervention (T2) and at study completion and/or

3760 2.2 Have better adherence to age-specific USDA nutrition recommendations, (e.g., age-  
3761 appropriate total calories increased, fruits and vegetables, decreased sugar sweetened  
3762 beverages [measured via diet recall data]), after the intensive phase (T2) and at study  
3763 completion.

3764

3765 **Analysis:**

3766 **(2.1)** A multiple regression model in which child sedentary activity level is regressed on group,  
3767 controlling for baseline sedentary activity level and including other relevant covariates (e.g.,  
3768 child gender), will be fit at T2 and at study completion.

3769 **(2.2)** Each child will be categorized as evincing, or not evincing, adherence to age-specific  
3770 USDA recommendations (as defined in the hypothesis). This binary variable will be the outcome  
3771 variable for this secondary analysis. We will test this first in an unadjusted analysis (a 2 x 2 table  
3772 in which one variable is the outcome variable and the other is group [treatment or control]), and  
3773 then in an adjusted logistic regression analysis predicting adherence category membership and  
3774 including appropriate covariates (e.g., gender, baseline BMI) in addition to group.

3775

3776 **Aim 3: Evaluate the effect of parents' physical activity levels and dietary behaviors on**  
3777 **children's levels of the same.**

3778 Hypothesis 3: Parents who have significantly lower sedentary activity levels (compared to  
3779 baseline) after treatment or who have better adherence to USDA nutrition recommendations  
3780 (age-appropriate total calories increased fruits and vegetables, decreased sugar sweetened  
3781 beverages [measured via diet recall data]) will be more likely than parents who have higher  
3782 sedentary activity levels or who do not adhere to USDA nutrition recommendations to have  
3783 children who will show

3784 3.1: Decreased sedentary activity levels post-treatment and

3785 3.2: Better adherence to USDA nutrition recommendations (as measured in 2.2, above).

3786

3787 **Analysis:**

3788 Two binary predictors will be created denoting whether parents have significantly lower  
3789 sedentary activity compared to baseline (yes/no) and whether they have appropriate versus  
3790 inappropriate dietary adherence (yes/no). These dichotomous variables will be entered into  
3791 models as follows:

3792 **(3.1)** A multiple regression model will be fit at T2 and at study completion in which child's  
3793 sedentary activity level is regressed on group, controlling for baseline child sedentary level, and  
3794 including the parent dichotomous variables, and two two-way interactions between the parent  
3795 variables and group (treatment or control) (and including other relevant covariates [e.g.,  
3796 gender]).

3797 **(3.2)** A logistic regression model will be fit at T2 and at study completion in which the binary  
3798 child adherence variable (see hypothesis 2.2) is regressed on group and including the parent  
3799 dichotomous variables and two two-way interactions between the parent variables and group  
3800 (treatment or control)

3801 (and including other relevant covariates [e.g., gender]).

3802

3803 **Aim 4: Explore the potential for developing new social networks and their effect on child**  
3804 **nutrition and physical activity.**

3805 Hypothesis 4: Parents in the treatment group will develop new social networks and the strength  
3806 of those social networks will be positively associated with reduced sedentary activity levels and  
3807 improved dietary behaviors (measured as indicated above) among both parents and children.

3808

3809 **Analysis:**

3810 A social network analysis will be conducted to determine the strength and cohesion of parents'  
3811 reported networks. The effect of these networks on parental and child sedentary activity levels  
3812 and dietary behavior will be estimated. Social network analysis will be conducted using the  
3813 software packages UCINET and In-Flow. UCINET will be used for entering and analyzing  
3814 network data and, along with In-flow, for generating network measures and graphical displays.  
3815 This data set will thus contain both network and attribute variables at the individual level of  
3816 analysis. Applying standard statistical techniques (e.g., regression, logistic regression, etc.)  
3817 these independent variables will be modeled with selected dependent variables. The analysis  
3818 will examine the change in these social networks over time and their impact on the main  
3819 outcomes of interest including: growth trajectories (children's BMI); body composition (child and  
3820 adult), parenting practices (child feeding); physical activity (child and adult), and total energy  
3821 intake. The social network hypothesis suggests that members of a given network group will  
3822 share health behavior characteristics more than members of other groups.

3823

3824 **Aim 5: Evaluate the moderating relationship between genetic risk factors and child BMI**  
3825 **trajectories over the course of the study.**

3826 Hypothesis 5: Higher levels of child genetic susceptibility to obesity (i.e., a higher genetic risk  
3827 score (Kathiresan, Voight et al. 2009)) will be significantly associated with heavier-for-age BMI  
3828 at baseline, and this susceptibility will moderate children's growth in BMI over time.

3829

3830 **Analysis:**

3831 "Heavier-for-age-BMI at baseline", the outcome, will be regressed on genetic risk score and the  
3832 interaction between risk score and time, controlling for other covariates as deemed important  
3833 (e.g., child gender, etc.).

3834

3835 **Aim 6: Assess the degree to which implementation of the GROW program encourages**  
3836 **additional lifestyle programming for preschool children and their parents in the Metro**  
3837 **Community Centers.**

3838 Hypothesis 6: The two Metro Community centers participating in the GROW trial will implement  
3839 a higher number of activity or nutrition programs for families (as defined by the centers) with  
3840 young children at the end of the study compared to the number they implemented at baseline,

3841 and they will also implement a higher number after the study compared to the number  
3842 implemented by non-participating Metro Community Centers.

3843

3844 **Analysis:**

3845 A simple count of the number of activity and nutrition programs will be taken at baseline within  
3846 both Community Centers (i.e., East and Coleman) and then again at the end of the study to  
3847 determine whether the number at study end within each center exceeds that at baseline.

3848 Similarly, counts will be taken of these types of programs at non-participating Metro Community  
3849 Centers at baseline and study end and these numbers will be compared to counts at both East  
3850 and Coleman to determine if both participating centers have higher numbers than the non-  
3851 participating centers at baseline and at study end.

3852

3853 **References**

3854

3855 1. Brantley PJ, Myers VH, Roy HJ. Environmental and lifestyle influences on obesity. *J La*  
3856 *State Med Soc* 2005;157 Spec No 1:S19-27.

3857 2. Carnell S, Wardle J. Appetite and adiposity in children: evidence for a behavioral  
3858 susceptibility theory of obesity. *Am J Clin Nutr* 2008;88:22-9.

3859 3. Webber L, Hill C, Saxton J, Van Jaarsveld CH, Wardle J. Eating behaviour and weight in  
3860 children. *Int J Obes (Lond)* 2008.

3861 4. Witkos M, Uttaburanont M, Lang CD, Arora R. Costs of and reasons for obesity. *J*  
3862 *Cardiometab Syndr* 2008;3:173-6.

3863 5. Zizza C, Siega-Riz AM, Popkin BM. Significant Increase in Young Adults' Snacking  
3864 between 1977–1978 and 1994–1996 Represents a Cause for Concern. *Prev Med* 2001;32:303-

3865 10

3866 6. Ogden CL, Flegal KM, Carroll MD, Johnson CL. Prevalence and trends in overweight  
3867 among US children and adolescents, 1999-2000. *Jama* 2002;288:1728-32.

3868 7. Ogden CL, Fryar CD, Carroll MD, Flegal KM. Mean body weight, height, and body mass  
3869 index, United States 1960-2002. *Advance data* 2004:1-17.

3870 8. Suminski RR, Poston WS, Jackson AS, Foreyt JP. Early identification of Mexican  
3871 American children who are at risk for becoming obese. *International journal of obesity and*  
3872 *related metabolic disorders : journal of the International Association for the Study of Obesity*  
3873 1999;23:823-9.

3874 9. Olshansky SJ, Passaro DJ, Hershow RC, et al. A potential decline in life expectancy in  
3875 the United States in the 21st century. *N Engl J Med* 2005;352:1138-45.

3876 10. Nader PR, O'Brien M, Houts R, et al. Identifying risk for obesity in early childhood.  
3877 *Pediatrics* 2006;118:e594-601.

3878 11. Must A, Jacques PF, Dallal GE, Bajema CJ, Dietz WH. Long-term morbidity and  
3879 mortality of overweight adolescents. A follow-up of the Harvard Growth Study of 1922 to 1935.  
3880 *N Engl J Med* 1992;327:1350-5.

3881 12. Barker DJ, Osmond C, Forsen TJ, Kajantie E, Eriksson JG. Trajectories of growth  
3882 among children who have coronary events as adults. *N Engl J Med* 2005;353:1802-9.

3883 13. Leunissen RW, Kerkhof GF, Stijnen T, Hokken-Koelega A. Timing and tempo of first-  
3884 year rapid growth in relation to cardiovascular and metabolic risk profile in early adulthood.  
3885 *JAMA* 2009;301:2234-42.

3886 14. Birch L, Ventura, AK. Preventing childhood obesity: what works? *Int J Obes (Lond)*  
3887 2009;33:74-81.

3888 15. Kropf JA, Keckley PH, Jensen GL. School-based obesity prevention programs: an  
3889 evidence-based review. *Obesity (Silver Spring)* 2008;16:1009-18.

3890 16. Summerbell CD, Waters E, Edmunds LD, Kelly S, Brown T, Campbell KJ. Interventions  
3891 for preventing obesity in children. *Cochrane Database Syst Revs* 2005.

3892 17. Small DM, Jones-Gotman M, Dagher A. Feeding-induced dopamine release in dorsal  
3893 striatum correlates with meal pleasantness ratings in healthy human volunteers. *Neuroimage*  
3894 2003;19:1709-15.

3895 18. Institute of Medicine. Committee on Progress in Preventing Childhood Obesity. *Progress*  
3896 *in Preventing Childhood Obesity: How do we measure up: The National Academies Press;*  
3897 *September 2006.*

3898 19. Levine AS, Kotz CM, Gosnell BA. Sugars and fats: the neurobiology of preference. *The*  
3899 *Journal of nutrition* 2003;133:831S-4S.

3900 20. U.S. Department of Health and Human Services. Strategic plan for NIH obesity  
3901 research: a report of the NIH Obesity Research Task Force, National Institutes of Health.  
3902 Rockville, MD2004.



- 3903 21. Epstein LH, Wing RR, Koeske R, Valoski A. Long-term effects of family-based treatment  
3904 of childhood obesity. *J Consult Clin Psychol* 1987;55:91-5.
- 3905 22. Crockett SJ, Mullis RM, Perry CL. Parent nutrition education: a conceptual model. *J Sch*  
3906 *Health* 1988;58:53-7.
- 3907 23. Strauss RS, Knight J. Influence of the home environment on the development of obesity  
3908 in children. *Pediatrics* 1999;103:e85.
- 3909 24. Wilson TA, Adolph AL, Butte NF. Nutrient adequacy and diet quality in non-overweight  
3910 and overweight Hispanic children of low socioeconomic status: the Viva la Familia Study. *J Am*  
3911 *Diet Assoc* 2009;109:1012-21.
- 3912 25. Epstein LH, Myers MD, Raynor HA, Saelens BE. Treatment of pediatric obesity.  
3913 *Pediatrics* 1998;101:554-70.
- 3914 26. Epstein LH, Valoski A, Wing RR, McCurley J. Ten-year outcomes of behavioral family-  
3915 based treatment for childhood obesity. *Health Psychol* 1994;13:373-83.
- 3916 27. Kamath CC, Vickers KS, Ehrlich A, et al. Clinical review: behavioral interventions to  
3917 prevent childhood obesity: a systematic review and metaanalyses of randomized trials. *The*  
3918 *Journal of clinical endocrinology and metabolism* 2008;93:4606-15.
- 3919 28. Perusse L, Tremblay A, Leblanc C, Bouchard C. Genetic and environmental influences  
3920 on level of habitual physical activity and exercise participation. *Am J Epidemiol* 1989;129:1012-  
3921 22.
- 3922 29. Barkeling B, Ekman S, Rossner S. Eating behaviour in obese and normal weight 11-  
3923 year-old children. *International journal of obesity and related metabolic disorders : journal of the*  
3924 *International Association for the Study of Obesity* 1992;16:355-60.
- 3925 30. Jansen A, Theunissen N, Slechten K, et al. Overweight children overeat after exposure  
3926 to food cues. *Eat Behav* 2003;4:197-209.
- 3927 31. American Dietetic Association. Position of the American Dietetic Association: individual-,  
3928 family-, school-, and community-based interventions for pediatric overweight. *J Am Diet Assoc*  
3929 2006;106:925-45.
- 3930 32. Wilson DK, Kirtland KA, Ainsworth BE, Addy CL. Socioeconomic status and perceptions  
3931 of access and safety for physical activity. *Ann Behav Med* 2004;28:20-8.
- 3932 33. Prevalence of Underweight Among Children and Adolescents: United States, 2003-  
3933 2006. 2009. (Accessed September 30, 2009, at  
3934 [http://www.cdc.gov/nchs/data/hestat/underweight\\_children.pdf](http://www.cdc.gov/nchs/data/hestat/underweight_children.pdf).)
- 3935 34. Sallis JF, Hovell MF, Hofstetter CR, et al. Distance between homes and exercise  
3936 facilities related to frequency of exercise among San Diego residents. *Public Health Rep*  
3937 1990;105:179-85.
- 3938 35. Estabrooks PA, Lee RE, Gyurcsik NC. Resources for physical activity participation: does  
3939 availability and accessibility differ by neighborhood socioeconomic status? *Ann Behav Med*  
3940 2003;25:100-4.
- 3941 36. Gordon-Larsen P, Griffiths P, Bentley ME, et al. Barriers to Physical Activity: Qualitative  
3942 Data on Caregiver-Daughter Perceptions and Practices. *Am J Prev Med* 2004;27:218-23.
- 3943 37. de la Haye K, Robins, G., Mohr, P., Wilson, C. . Obesity-related behaviors in adolescent  
3944 friendship networks. *Soc Networks* 2010;32:161-7.
- 3945 38. Valente TW, Fujimoto K, Chou CP, Spruijt-Metz D. Adolescent affiliations and adiposity:  
3946 a social network analysis of friendships and obesity. *J Adolesc Health* 2009;45:202-4.
- 3947 39. Bahr DB, Browning RC, Wyatt HR, Hill JO. Exploiting social networks to mitigate the  
3948 obesity epidemic. *Obesity (Silver Spring)* 2009;17:723-8.
- 3949 40. Christakis NA, Fowler JH. The spread of obesity in a large social network over 32 years.  
3950 *N Engl J Med* 2007;357:370-9.
- 3951 41. Gesell SB, Tesdahl, E., Ruchman, E. The Distribution of Physical Activity in an  
3952 Afterschool Friendship Network. *Pediatrics* 2012.

3953 42. Gesell SB, Bess, K., Barkin, S.L. Understanding the new social networks that form within  
3954 the context of an obesity prevention intervention. *Journal of Obesity* 2012.  
3955 43. Valente T. In: Gesell S, ed.2011.  
3956 44. Smith KP, Christakis, Nicholas A. *Social Networks and Health. Annual Reviews*  
3957 *2008;34:405-29.*  
3958 45. Coady SA, Jaquish CE, Fabsitz RR, Larson MG, Cupples LA, Myers RH. Genetic  
3959 variability of adult body mass index: a longitudinal assessment in framingham families. *Obes*  
3960 *Res* 2002;10:675-81.  
3961 46. Wardle J, Carnell S, Haworth CM, Plomin R. Evidence for a strong genetic influence on  
3962 childhood adiposity despite the force of the obesogenic environment. *Am J Clin Nutr*  
3963 *2008;87:398-404.*  
3964 47. Willer CJ, Speliotes EK, Loos RJ, et al. Six new loci associated with body mass index  
3965 highlight a neuronal influence on body weight regulation. *Nat Genet* 2009;41:25-34.  
3966 48. Baker DW. The meaning and the measure of health literacy. *J Gen Intern Med*  
3967 *2006;21:878-83.*  
  
3968  
3969  
  
3970

3971  
 3972  
 3973  
 3974  
 3975  
 3976  
 3977  
 3978  
 3979  
 3980  
 3981  
 3982

**Summary of all Amendments of the GROW Trial**

IRB amendments were used in the GROW Trial when changes were proposed from the original plan in any part of the research study including study design, informed consent procedures, or any revisions to the approved research protocol. These changes were proposed and only implemented until the Principal Investigator received final written IRB approval. All amendments involved minor changes that pose no more than minimal risk to subjects. Below are the critical IRB amendments requested for the GROW Trial and sorted in chronological order. Others not included are minor requests (e.g., changes in key study personnel, updating Spanish translations of informed consent documents, etc.).

| Approval Date | Amendments                                                                                                                                                                                                                                                                                                                                                                                                                                                                                                                                                                          |
|---------------|-------------------------------------------------------------------------------------------------------------------------------------------------------------------------------------------------------------------------------------------------------------------------------------------------------------------------------------------------------------------------------------------------------------------------------------------------------------------------------------------------------------------------------------------------------------------------------------|
| 6/12/12       | Adding an online survey for recreational leaders                                                                                                                                                                                                                                                                                                                                                                                                                                                                                                                                    |
| 7/12/12       | <ol style="list-style-type: none"> <li>1) Changing the names of both treatment groups from the “full” group (intervention arm) to “GROW Healthier” and the “lite” group (control arm) to “GROW Smarter”.</li> <li>2) Using StarPanel as a potential retention tool for families that have been lost at final data collection point (T6).</li> </ol>                                                                                                                                                                                                                                 |
| 7/31/12       | Adding performance sites not engaged in research as potential recruitment areas.                                                                                                                                                                                                                                                                                                                                                                                                                                                                                                    |
| 9/19/12       | <ol style="list-style-type: none"> <li>1. Adding an additional procedure (i.e., Geographical Information Systems (GIS)) to correlate between macro-level built environment data from external sources (i.e., Metro Planning Department) of participants' home address to their perceived built environment (i.e., barriers to physical activity survey data).</li> <li>2. Revising parental informed consent form to clarify risk for participants.</li> </ol>                                                                                                                      |
| 12/18/12      | <ol style="list-style-type: none"> <li>1. Adding additional performances sites as potential recruitment areas.</li> <li>2. Changing recruitment strategy from 3-waves to a rolling recruitment cohort strategy.</li> <li>3. Including the availability of make-up phone call sessions for all intervention family participants in the intensive phase and including the availability of make-up data collection sessions for all intervention and control family participants, at all 6-data collection sessions, which may include participant's homes, if they prefer.</li> </ol> |
| 1/18/13       | Offering preliminary data collection at convenient locations including the participants' homes, if requested.                                                                                                                                                                                                                                                                                                                                                                                                                                                                       |
| 2/15/13       | <ol style="list-style-type: none"> <li>1) Using associated visuals during the consent process to increase participant comprehension efficiently with low-literacy targeted participants.</li> <li>2) Updating pre-screen eligibility scrips</li> <li>3) Revising raffle incentives implemented during the intensive phase of the intervention.</li> </ol>                                                                                                                                                                                                                           |
| 3/8/13        | Adding an additional recruitment strategy whereby participants will receive a small compensation for successfully enrolling participants, based on their referrals.                                                                                                                                                                                                                                                                                                                                                                                                                 |
| 3/19/13       | Implementing text messages by research staff to remind study participants of upcoming sessions and providing them with information relevant to the study aims (i.e., promoting health and/or school success).                                                                                                                                                                                                                                                                                                                                                                       |
| 5/14/13       | Using child's height and weight pre-screening data for baseline data collection.                                                                                                                                                                                                                                                                                                                                                                                                                                                                                                    |
| 8/20/13       | <ol style="list-style-type: none"> <li>1. Changing the timing (i.e., data collection points) on our cognitive assessments; and</li> <li>2. administering quality control measures on a random number of participants and compensating them with a \$10 gift card.</li> </ol>                                                                                                                                                                                                                                                                                                        |
| 4/22/14       | Adding 30 additional parent/child dyads for study participation.                                                                                                                                                                                                                                                                                                                                                                                                                                                                                                                    |
| 5/20/14       | Offering an invitational letter to lost study participants that allows opportunities for them to be re-engaged during the maintenance and sustainability phases of the study.                                                                                                                                                                                                                                                                                                                                                                                                       |
| 6/5/14        | Adding new ancillary study aims: 1) ACTIVATE (a sub-cohort that invites family members to participate in a brief survey at T5 and T6 related to social networks); and 2) GROW Baby (a                                                                                                                                                                                                                                                                                                                                                                                               |

|         |                                                                                                                                                                                                                                                                                   |
|---------|-----------------------------------------------------------------------------------------------------------------------------------------------------------------------------------------------------------------------------------------------------------------------------------|
|         | sub-cohort that invites family members that become pregnant to participate in a study that compares pregnancy medical records to study outcomes).                                                                                                                                 |
| 1/21/15 | Revising informed consent to further increase clarification of risk when participating in other community-led programs not related to study.                                                                                                                                      |
| 3/24/15 | Adding 6 questions to an existing and previously approved survey for our study participants, measuring maternal diet and physical activity during pregnancy.                                                                                                                      |
| 7/14/15 | Adding an additional parental consent form at the last data collection time point (i.e., T6) to obtain a second round of saliva from the existing child participants.                                                                                                             |
| 10/1/15 | <ol style="list-style-type: none"> <li>1. Increasing the amount of compensation for our study participants at T5 and T6 (up to \$100) to complete certain data elements.</li> <li>2. Inviting participants to participate in the trial for another follow-up year (T7)</li> </ol> |
| 5/18/17 | Requesting a Certificate of Confidentiality for all of our study participants                                                                                                                                                                                                     |

3983

3984

3985

3986 **Original Statistical Analysis Plan**  
3987 **Reviewed and approved by the DSMB in April, 2012**  
3988

3989  $BMI = \beta_0 C + \beta_1 I + \beta_2 (age-X)C + \beta_3 (age-X)^2 C + \beta_4 (age-X)I + \beta_5 (age-X)^2 I + \dots + \text{error terms}$

3990 where:

3991 “I” is an indicator for group and equals 1 for the intervention group and 0 for the control group;

3992 “C” is an indicator for group and equals 1 for the control group and 0 for the intervention group;  
3993 there is no intercept in this model in the ‘traditional sense’ (see point 2 below);

3994 “X” is the value at which we center age; we plan to use age at enrollment as our centering term,  
3995 which will make the indicator variables interpretable ( $\beta_0$  as the mean BMI at enrollment for those  
3996 in the control group and  $\beta_1$  as the mean BMI at enrollment for the intervention group);

3997 “...” stands for other predictors; at the present time, we believe that the predictors for the main  
3998 model will be gender (coded, e.g., as 1 for female and 0 for male) and ethnicity (we expect there  
3999 to be 3 ethnicity groups and thus 2 indicator variables for these); in addition, gender by age  
4000 interaction terms will be included, since the literature indicates that trajectories may differ by  
4001 gender;

4002 For the primary analysis, "error terms" will include subject, subject X age, and the covariance  
4003 between these random effects, using a heterogeneous variance structure for the fitted model  
4004 (Roberts & Roberts, 2005). For the primary analysis, we will not include a random effect for  
4005 subject X age<sup>2</sup>, given that, with our proposed unstructured covariance matrix, the inclusion of  
4006 this additional random effect would result in 13 random-effects components and may lead to  
4007 convergence problems (see Rabe-Hesketh & Skrondal, 2012, page 348). We will examine the  
4008 consequences of this choice via planned secondary analyses.

4009 A post-hoc test of whether  $\beta_3 = \beta_5$  will allow us to examine whether the quadratic terms differ  
4010 between arms of the trial, thus answering our primary research question.

4011

4012 Interpretation of some terms: the indicator variable for trial arm, the linear term (age) for trial  
4013 arm, and the quadratic term (age)<sup>2</sup> for trial arm jointly describe the trajectory (and starting point)  
4014 for each group (intervention and control), and each can be interpreted as follows: the constant is  
4015 the mean BMI at age on entry into the trial; the linear term indicates the rate of change at entry  
4016 age; and the quadratic term indicates change in rate of growth (acceleration). In our  
4017 specification, this model allows each child to have her/his own BMI intercept at baseline and  
4018 own BMI trajectory. Accordingly, we do not include BMI at baseline as a predictor in our model.  
4019 Additionally, we do not include a BMI by treatment interaction, because BMI is an outcome and  
4020 treatment is a predictor. We plan to examine a baseline BMI by treatment interaction (as well as  
4021 other interactions) in our secondary analysis.

4022

4023 Our hypothesis is that  $\beta_5$ , the quadratic term for the intervention group, will be significantly  
4024 different from  $\beta_3$ , the quadratic term for the control group, at the 0.05 level. We do not have an

4025 hypothesis about the linear terms. Note that we expect the sign of  $\beta_5$  to be positive, and we  
4026 expect the coefficient to be smaller than the coefficient for  $\beta_3$ .

4027



4028 ***Final Statistical Analysis Plan***  
4029 ***Finalized in November, 2016***  
4030

4031 Study Design

4032 The design of the study is a longitudinal non-blinded (open) randomized control trial. Within  
4033 each of two sites, adult-child dyads with children ages 3-5 years will be randomly assigned,  
4034 stratified according to parent language use (English or Spanish), to either the three-year  
4035 prevention program or the control condition. Assessments will occur over 6 time points within  
4036 each cohort, beginning at baseline and including assessments post-intervention (at 12 weeks/3  
4037 months), and at 9, 12, and 36 months from baseline.

4038

4039 Primary Research Question and Hypothesis

4040 Our primary research question is about the impact of the GROW trial on the growth rate of  
4041 children's BMI over time. Specifically, we hypothesize the following:

4042 Hypothesis 1: The BMI trajectories of children in the treatment group will change at a slower  
4043 rate than those in the control group over time.

4044

4045 Primary Outcome

4046 Although childhood obesity is a well-documented public health concern, most studies have  
4047 assessed the obesity outcome (e.g., BMI) using only a single time point or incorporating a pre-  
4048 post design, leaving us with little knowledge about the actual shape or growth rate of trajectories  
4049 of BMI during this critical period of development. Indeed, few studies have taken a  
4050 developmental perspective in order to understand how and when obesity develops in early  
4051 childhood. By measuring BMI at multiple time points, we will examine growth trajectories in early  
4052 childhood.

4053 \* \* \*

4054 Because clinical literature about childhood obesity indicates that the shape of the BMI trajectory  
4055 across ages 3 to 8 is curvilinear, we will account for this in our analytic plan. ([Kuczmarowski, Ogden  
et al. 2002](#); [Cole 2004](#)) (see below).

4057

4058 Primary Analysis

4059

4060 Statistical model and approach

4061

4062 Our primary analysis will be an intent-to-treat analysis, and we will fit a multilevel mixed-effects  
4063 linear model using a maximum likelihood procedure to handle missing data.

4064 Time-varying BMI will be the outcome at Level 1 nested within children at Level 2. Time at  
 4065 Level 1 will be in years since baseline as computed from the date of each child's measurement  
 4066 at each time point. The following child-level (Level 2), time invariant variables will be predictors  
 4067 of the linear and quadratic BMI growth rates and the intercept at Level 1: age at baseline  
 4068 (centered at a value of interest) and random assignment to intervention or control. Child gender  
 4069 will be a child-level (Level 2), time invariant predictor of the intercept at Level 1. This approach  
 4070 allows the estimation of growth rates based on each child's individual measurement dates, and  
 4071 accounts for both age at baseline and time in the study.

4072 The Level 1 equation is as follows:

$$BMI_{ti} = \pi_{0i} + \pi_{1i}(Time)_{ti} + \pi_{2i}(Time)_{ti}^2 + e_{ti}$$

4073 where BMI for each child  $i$  is repeated over time  $t$ . BMI for a given child is a function of the  
 4074 individually varying baseline intercept  $\pi_{0i}$ , the linear growth rate  $\pi_{1i}$  across 36 months, the  
 4075 quadratic growth rate (acceleration)  $\pi_{2i}$ , and a random error term.

4076

4077 The intercept and two growth parameters will then be regressed on Level 2 (child-level)  
 4078 predictors as follows:

4079 BMI Intercept:  $\pi_{0i} = \beta_{00} + \beta_{01}(age - C)_i + \beta_{02}(I)_i + \beta_{03}(F)_i + r_{0i}$

4080 Linear Growth:  $\pi_{1i} = \beta_{10} + \beta_{11}(age - C)_i + \beta_{12}(I)_i + r_{1i}$

4081 Quadratic Growth:  $\pi_{2i} = \beta_{20} + \beta_{21}(age - C)_i + \beta_{22}(I)_i + r_{2i}$

4082 where  $I$  is an indicator for group assignment and equals 1 for the intervention group and 0 for  
 4083 the control group, and  $F$  is an indicator for sex and equals 1 for females and 0 for males.  $\beta_{00}$  is  
 4084 the mean initial BMI in control group males while adjusting for child age at baseline (centered),  
 4085  $\beta_{01}$  is the effect of child age at baseline (centered) on initial BMI,  $\beta_{02}$  is the effect of being  
 4086 assigned to the intervention group on initial BMI (expected to be 0),  $\beta_{03}$  is the effect of being  
 4087 female on initial BMI, and  $r_{0i}$  is the random error variance.  $\beta_{10}$  represents the linear growth rate  
 4088 at baseline in the control group while adjusting for child age at baseline, and  $\beta_{11}$  is the effect of  
 4089 child age at baseline on linear growth.  $\beta_{12}$  is the intervention effect on linear growth, and  $\beta_{22}$  is  
 4090 the intervention effect on BMI acceleration while adjusting for child age at baseline.

4091 The Level 1 and Level 2 equations can then be combined and regrouped to yield a single  
 4092 equation for the model:

$$\begin{aligned}
 BMI_{ti} = & [\beta_{00} + \beta_{01}(age - C)_i + \beta_{02}(I)_i + \beta_{03}(F)_i] \\
 & + [\beta_{10}(Time)_{ti} + \beta_{11}(age - C)_i(Time)_{ti} + \beta_{12}(I)_i(Time)_{ti}] \\
 & + [\beta_{20}(Time)_{ti}^2 + \beta_{21}(age - C)_i(Time)_{ti}^2 + \beta_{22}(I)_i(Time)_{ti}^2] \\
 & + [r_{0i} + r_{1i}(Time)_{ti} + r_{2i}(Time)_{ti}^2 + e_{ti}]
 \end{aligned}$$

4093 where the terms in the first bracket contribute to the intercept, the second bracket's terms  
 4094 contribute to the linear growth, the third bracket's terms contribute to the quadratic growth, and  
 4095 the final bracket contains all of the random error terms. We will specify an unstructured  
 4096 variance-covariance matrix.

4097 We will conduct a likelihood ratio test with two degrees of freedom to test whether the linear and  
4098 quadratic intervention effects ( $\beta_{12}$  and  $\beta_{22}$ , respectively) are jointly equal to zero. If this joint test  
4099 is not significant at  $p < 0.05$  then intervention effectiveness is not demonstrated. If this joint test  
4100 is significant at the  $p < 0.05$  level, then the intervention effect was significant.

4101

4102 Missing data including level of attrition, lost to follow-up, and missing data treatment

4103 With 6 repeated measurements, some participants inevitably will miss one or more occasions of  
4104 outcome data collection. One advantage of the mixed models over older repeated measure  
4105 ANOVA models is the use of all available data without dropping any subjects ([Nich and Carroll  
4106 1997](#)).

4107

4108 References

4109 Singer, J.D., & Willett, J. B. (2003). Applied longitudinal data analysis: Modeling change and  
4110 event occurrence. New York, NY: Oxford University Press.

4111 Harold, G. T., et al. (2013). Depressive symptom trajectories among girls in the juvenile justice  
4112 system: 24-month outcomes of an RCT of multidimensional treatment foster care. *Prev. Sci.*  
4113 (14). DOI: 10.1007/s11121-012-0317-y.

4114

4115

4116 **Summary of Primary Analysis Adjustments, Clarifications and Specifications**  
4117

4118 All changes were made with all study personnel still blinded to non-baseline data aggregated by  
4119 group, including the site-statisticians.

4120 The original analysis plan specified what we thought the predictor variables would be at the  
4121 time. We have now finalized the included predictor variables for the primary analysis plan. We  
4122 still adjust for age at baseline and gender, but we do not adjust for ethnicity because of the  
4123 relative homogeneity of our recruited sample.

4124 Gender is a predictor of the intercept (i.e., initial BMI), and we no longer include a gender by  
4125 age interaction. This is because the literature shows that girls have a lower BMI intercept than  
4126 boys at a given age, but the overall shapes of their respective growth curves are comparable.

4127 The revised plan has clarified that the age predictor is baseline age, and time is longitudinal  
4128 follow-up representing the time a child was exposed to the intervention or control.

4129 The original plan specified that post-hoc secondary analyses would be conducted to determine  
4130 the potential effect of using different methods for handling missing data (e.g., multiple imputation  
4131 [MI] with and without auxiliary variables), and we still plan to do this. The current plan makes it  
4132 clear that we will be using a maximum likelihood (ML) procedure to handle missing data in the  
4133 primary analysis.

4134 The original primary hypothesis was that the quadratic term for the intervention group will be  
4135 different from the quadratic term for the control group at the  $p < 0.05$  level. There was no  
4136 hypothesis for the linear term. In the current plan we will conduct a likelihood ratio test with two  
4137 degrees of freedom to test whether the linear and quadratic intervention effects are jointly equal  
4138 to zero. Intervention effectiveness will be demonstrated if this joint test is significant at the  
4139  $p < 0.05$  level. We made this change because both the linear and quadratic terms determine the  
4140 overall shape of the outcome curve, and this approach is consistent with typical growth  
4141 modeling (Singer & Willett, 2003). It is critical to note again that this determination was made  
4142 with all study personnel blinded to non-baseline data aggregated by group, including the site-  
4143 statisticians.

4144 The original analysis plan proposed a heterogeneous variance structure, allowing for the ICC at  
4145 the level of session to be estimated separately for the intervention arm and not for the control  
4146 arm (because control participants are not assigned to group sessions). We have since decided  
4147 to model a homogeneous variance structure in the primary analysis; we will explore for a  
4148 potential heterogeneous variance structure in secondary analyses.

4149
